# Supplementary material for: Neural control of growth and size in the axolotl limb regenerate
Source: eLife journal article supplement (doi:10.7554/elife.68584), 2021-11-15
Supplement: supp [file elife_poa_e68584_Figure_1_figure_supplement_2_source_data_1.xlsx]

## Sheet: Sheet1
note: raw data for Figure 1 -figure supplement 2A is located in Figure 1 -source data 1 and 2
Figure S2A
AVG	Unamputated Limb	Early Tiny Limb	Late Tiny Limb	Fully Regenerated Limbs
4cm Animals	0.0221429	0.057	0.0362573	0.0218045
10cm Animals	0.022449	0.0405952	0.0214286	0.00305556
20cm Animals	0.00566667	0.0292105	0.0233333	0.00366667
SEM	Unamputated Limb	Early Tiny Limb	Late Tiny Limb	Fully Regenerated Limbs
4cm Animals	0.00177082	0.00281911	0.001368	0.00384203
10cm Animals	0.00246723	0.00119526	0.0027848	0.000873517
20cm Animals	0.00179505	0.00373091	0.00368514	0.000955814
Figure 1 -figure supplement 2B
	4cm Animals													20cm Animals														10cm Animals
	DPA	0	21	23	30	34	44	48	51	69	76			DPA	0	30	44	63	77	89	112	128	200					DPA	0	2	7	14	20	24	28	31	35	38	48	52	56	63	72	77	84	91	97	104	111
	Body Length (cm)	4.1	6.5	6.6	6.9	7.4	8.4	8.7	8.9	11	11.3			Body Length (cm)	19.2	19	19.5	20	20.5	21	21.6	21.8	24					Body Length (cm)	10.2	10.2	11.4	12	12.4	12.75	13.1	13.2	13.3	13.5	14.1	14.2	14.2	14.9	15.6	15.9	16.1	16.6	16.9	17.4	17.9
		4.5	6.2	6.3	6.7	7.2	8.5	9	9.3	11.2	11.6				20.8	21	21.3	21.1	21.7	21.9	22.2	22.5	22.3						11	11	11.3	12.1	12.6	13.4	13.6	13.8	13.9	13.9	14.5	14.7	14.9	15.3	15.8	16.1	16.5	16.9	17.2	17.5	17.8
		4	5.3	5.8	6.3	6.8	7.9	8.4	8.7	10.9	11.4				19.4	19.5	20.2	19.5	20	20.1	20.1	21	24						10.5	10.6	10.9	11.2	11.6	12.2	12.6	12.6	12.9	13	13.4	13.8	14	15.2	15.8	16.1	16.6	16.9	16.9	17.1	17.4
		4.3	6.3	6.7	7.3	7.5	8.6	9	9.2	11.2	11.5				19.8	21	21.4	21.6	22	22.5	22.4	22.7	25.1						10.1	10.2	11.7	12.4	12.7	13.3	13.4	13.7	13.8	14	14.6	14.8	14.9	14.8	15.65	15.9	16.45	16.7	17.5	17.3	17.7
		4.8	5.9	5.8	6.7	6.9	7.9	8.3	8.4	10.1	10.7				18.6	19.5	20	20	19.7	20.4	20.3	20.7	24.9						10.6	10.6	12	12.7	13.1	13.6	14.2	14.3	14.3	14.4	15	15.2	15.3	14.8	15.4	15.7	16.2	16.5	17.4	15.2	15.6
		4.1	5	5.4	5.9	6.1	6.7	7.4	7.4	8.7	9.1				19.2	20.1	20.1	20.4	20.7	20.5	21.2	21.5	21.8						9.4	9.6	11.6	12.4	12.9	13.6	13.5	13.7	13.9	14	14.5	14.8	14.8	14.5	15.3	15.6	16.1	16.5	17.2
		5.2	7	7.2	7.8	8.1	9.3	9.8	10	11.6	12.2				20.2	21	21.7	22	22	22.4	22.7	22.9	22.9						10.8	10.9	11.3	12.2	12.5	12.8	13.3	13.5	13.5	13.7	14.3	14.5	14.5	15	15.8	16.2	16.7	17.2	17.1
		4.7	6.7	7.3	8	8.2	9.1	9.7	10.1	11.4	11.9				20.6	22.1	22.5	23	23.3	23.8	24.1	24.1	22.1						9.9	10	11.1	11.8	12.1	12.6	13	13.2	13.2	13.3	13.6	13.8	13.9	15.1	13.9	16.2	16.7	17	16.6
		5	7.3	7.5	8.2	8.3	9.6	10	10.1	11.5	12				21.6	22	22.5	22.7	22.7	23.3	23.5	24.2	21.9						9.8	9.9	10.6	11.6	12.2	12.8	12.9	13	13	13.3	13.8	14	14.1	14.9	15.7	15.9	16.2	16.6	16.7
		4.9	6.8	6.9	8	8.2	9.4	9.5	10	11.5	11.9				18.5	19.2	20	20	20.1	20.5	20.7	21.5	24.3						11.1	11.2	10.9	11.6	12.1	12.5	12.8	13	13.1	13.4	13.9	14.1	14.3	13.1	13.6	13.9	16.2	14.6	14.8
		4	5.5	5.9	6.9	7	8.3	8.5	9.2	11.2	11.6																		10.9	11.1	11.1	11.9	12.6	13	13.3	13.5	13.6	13.7	14.4	14.6	14.6
		5.3	7.4	8	8.5	9	10	10.3						AVG	19.79	20.44	20.92	21.03	21.27	21.64	21.88	22.29	23.33						10	10.2	10.8	11.4	12.2	12.5	12.9	13.2	13.5	13.6	14.2	14.3	14.3
		4.6	6.9	7.1	7.8	8.2	9.2	9.6	9.7	11.6	12.1			StDev	1.00272	1.13647	1.09929	1.24101	1.23743	1.32178	1.34148	1.21056	1.27284						10.5	10.5	11.1	12	12.5	13	13.4	13.4	13.7	13.7	14.4	14.6	14.6
		4	5.6	5.9	6.9	7.1	8.3	8.7	8.8	10.7	11.1			SEM	0.33424	0.378822	0.366431	0.413671	0.412475	0.440594	0.447158	0.403518	0.424279						10.5	10.6	11.3	11.8	12.6	12.9	13.3	13.5	13.6	13.9	14.4	14.5	14.7
		4.1	5.9	6.4	7.1	7.5	8.5	8.8	9.1	10.7	11.3																		10.1	10.3	10.3	11	12	12.4	12.7	13	13.1	13.4	13.8	14.1	14.3
		4.2	5.4	5.6	6.3	6.6	7.5	8.1	8.3	9.9	10.3																		10.3	10.4	10.7	11.3	12.2	12.5	12.7	13	13.1	13.3	14	14	14.2
		4.4	6.1	6.6	7.1	7.8	8.7	9.3	9.5	11.2	11.8																		9.8	9.9	10.5	11.2	12	12.3	12.8	13	13.2	13.3	13.9	14.1	14.1
		4.2	7.1	7.4	8.4	8.7	9.5	9.9	10.4	11.8	12.6																		9.9	10	10.5	11.3	12.2	12.7	13	13.2	13.3	13.45	14	14.3	14.3
		4.8	6.7	7	7.5	7.8	9	9.5	9.8	11.3	11.7																		10.4	10.5	10.6	11.6	12.4	12.7	13.1	13.3	13.5	13.6	14.2	14.5	14.6
		3.6	4.7	5	5.3	5.8	6.6	7	7.4	8.9	9.6																		10	10.1	10.9	11.5	12.3	12.8	13.1	13.2	13.3	13.3	14	14.3	14.3
																													8.9	8.9	9.3	10	10.5	10.9	11.1	11.3	11.3	11.5	12.2	12.5	12.6
	AVG	4.44	6.215	6.52	7.18	7.51	8.55	8.975	9.17368	10.8632	11.3526																	AVG	10.2238	10.319	10.9476	11.6667	12.2714	12.7262	13.0381	13.219	13.3381	13.4881	14.0571	14.2714	14.3571	14.76	15.255	15.75	16.375	16.55	16.83	16.9	17.28
	StDev	0.456992	0.785577	0.795778	0.856308	0.838482	0.90815	0.866253	0.865282	0.876363	0.884036																	StDev	0.533765	0.532559	0.574995	0.590198	0.526444	0.573502	0.578339	0.57238	0.582646	0.558548	0.561757	0.538649	0.52969	0.625744	0.813924	0.680278	0.24181	0.723034	0.76891	0.961769	0.957601
	SEM	0.102187	0.17566	0.177941	0.191476	0.18749	0.203069	0.1937	0.198509	0.201051	0.202812																	SEM	0.116477	0.116214	0.125474	0.128792	0.114879	0.125148	0.126204	0.124904	0.127144	0.121885	0.122586	0.117543	0.115588	0.197878	0.257385	0.215123	0.0764671	0.228643	0.243151	0.430116	0.428252
		Avg. Body Length (cm)					SEM
		DPA	4cm	10cm	20cm		DPA	4cm	10cm	20cm
		0	4.44	10.2238	19.79		0	0.456992	0.533765	1.00272
		2		10.319			2		0.532559
		7		10.9476			7		0.574995
		14		11.6667			14		0.590198
		20		12.2714			20		0.526444
		21	6.215				21	0.785577
		23	6.52				23	0.795778
		24		12.7262			24		0.573502
		28		13.0381			28		0.578339
		30	7.18		20.44		30	0.856308		1.13647
		31		13.219			31		0.57238
		34	7.51				34	0.838482
		35		13.3381			35		0.582646
		38		13.4881			38		0.558548
		44	8.55		20.92		44	0.90815		1.09929
		48	8.975	14.0571			48	0.866253	0.561757
		51	9.17368				51	0.865282
		52		14.2714			52		0.538649
		56		14.3571			56		0.52969
		63		14.76	21.03		63		0.625744	1.24101
		69	10.8632				69	0.876363
		72		15.255			72		0.813924
		76	11.3526				76	0.884036
		77		15.75	21.27		77		0.680278	1.23743
		84		16.375			84		0.24181
		89			21.64		89			1.32178
		91		16.55			91		0.723034
		97		16.83			97		0.76891
		104		16.9			104		0.961769
		111		17.28			111		0.957601
		112			21.88		112			1.34148
		128		18.13	22.29		128		0.94578	1.21056
		146		18.62			146		0.920326
		200			23.33		200			1.27284
[truncated: 2 more columns]
