# Supplementary material for: Neural control of growth and size in the axolotl limb regenerate
Source: eLife journal article supplement (doi:10.7554/elife.68584), 2021-11-15
Supplement: supp [file elife_poa_e68584_Figure_1_source_data_1.xlsx]

## Sheet: Sheet1
DATA FROM 10 CM ANIMALS
Regenersting Limbs
												Early TL					Late TL																						Early TL					Late TL
Limb Length (cm)	DPA		0	2	7	14	20	24	28	31	35	38	48	52	56	63	72	77	84	91	97	104	111	128	146		Body Length (cm)	DPA		0	2	7	14	20	24	28	31	35	38	48	52	56	63	72	77	84	91	97	104
	512	2.2	0.4	0.5	0.6	0.85	1	1.1	1.2	1.3	1.4	1.55	2.15	2.3														512	10.2	10.2	10.2	11.4	12	12.4	12.75	13.1	13.2	13.3	13.5	14.1	14.2	14.2
	514	2.5	0.5	0.55	0.55	0.8	0.9	1.1	1.25	1.35	1.5	1.7	2.1	2.25														514	11	11	11	11.3	12.1	12.6	13.4	13.6	13.8	13.9	13.9	14.5	14.7	14.9
	517	2.3	0.5	0.5	0.45	0.65	0.8	1	1.05	1.15	1.3	1.5	1.95	2.05														517	10.5	10.5	10.6	10.9	11.2	11.6	12.2	12.6	12.6	12.9	13	13.4	13.8	14
	521	2.3	0.4	0.4	0.45	0.75	0.9	1.1	1.2	1.35	1.55	1.7	2.2	2.2														521	10.1	10.1	10.2	11.7	12.4	12.7	13.3	13.4	13.7	13.8	14	14.6	14.8	14.9
	528	2.2	0.4	0.45	0.55	0.8	0.95	1.15	1.4	1.5	1.7	1.8	2.2	2.4														528	10.6	10.6	10.6	12	12.7	13.1	13.6	14.2	14.3	14.3	14.4	15	15.2	15.3
	529	2.1	0.5	0.55	0.5	0.75	0.9	1	1.1	1.2	1.35	1.5	1.9	2.15														529	9.4	9.4	9.6	11.6	12.4	12.9	13.6	13.5	13.7	13.9	14	14.5	14.8	14.8
	532	2.3	0.4	0.45	0.6	0.85	0.9	1.1	1.3	1.35	1.5	1.7	2	2.25														532	10.8	10.8	10.9	11.3	12.2	12.5	12.8	13.3	13.5	13.5	13.7	14.3	14.5	14.5
	511	2.1	0.4	0.45	0.5	0.8	0.85	1	1.3	1.35	1.5	1.7	2.2	2.3														511	9.9	9.9	10	11.1	11.8	12.1	12.6	13	13.2	13.2	13.3	13.6	13.8	13.9
	515	2.1	0.4	0.45	0.45	0.7	0.8	1	1.1	1.2	1.3	1.55	1.9	2.1														515	9.8	9.8	9.9	10.6	11.6	12.2	12.8	12.9	13	13	13.3	13.8	14	14.1
	530	2.2	0.5	0.55	0.6	0.8	0.85	1	1.15	1.3	1.4	1.6	2	2.1														530	11.1	11.1	11.2	10.9	11.6	12.1	12.5	12.8	13	13.1	13.4	13.9	14.1	14.3
	531	2.3	0.4	0.5	0.5	0.8	1	1	1.3	1.35	1.5	1.7	2.2	2.35														531	10.9	10.9	11.1	11.1	11.9	12.6	13	13.3	13.5	13.6	13.7	14.4	14.6	14.6
	533	2.2	0.5	0.55	0.5	0.75	0.95	1.1	1.25	1.35	1.45	1.65	2.05	2.3	2.35	2.55	2.8	2.85	3	3.15								533	10	10	10.2	10.8	11.4	12.2	12.5	12.9	13.2	13.5	13.6	14.2	14.3	14.3	14.9	15.6	15.9	16.1	16.6	16.9
	534	2.3	0.4	0.45	0.6	0.85	1	1.15	1.2	1.4	1.5	1.65	2	2.2	2.4	2.7	2.9	3	3	3.2								534	10.5	10.5	10.5	11.1	12	12.5	13	13.4	13.4	13.7	13.7	14.4	14.6	14.6	15.3	15.8	16.1	16.5	16.9	17.2
	537	2.3	0.5	0.55	0.45	0.7	0.9	1.05	1.1	1.25	1.45	1.6	2	2.2	2.3	2.5	2.65	2.8	3.15	3.2								537	10.5	10.5	10.6	11.3	11.8	12.6	12.9	13.3	13.5	13.6	13.9	14.4	14.5	14.7	15.2	15.8	16.1	16.6	16.9	16.9
	518	2.1	0.4	0.45	0.55	0.85	0.95	1	1.15	1.3	1.4	1.6	2.05	2.15	2.4	2.7	2.9	3.05	3.25	3.3								518	10.1	10.1	10.3	10.3	11	12	12.4	12.7	13	13.1	13.4	13.8	14.1	14.3	14.8	15.65	15.9	16.45	16.7	17.5
	525	2.2	0.5	0.55	0.45	0.7	0.85	1	1.1	1.25	1.4	1.55	1.9	2.15	2.25	2.5	2.75	2.8	3	3.1								525	10.3	10.3	10.4	10.7	11.3	12.2	12.5	12.7	13	13.1	13.3	14	14	14.2	14.8	15.4	15.7	16.2	16.5	17.4
	527	2.1	0.4	0.45	0.5	0.75	0.95	1.1	1.2	1.3	1.5	1.7	2	2.2	2.3	2.6	2.75	2.85	3.05	3.15	3.3	3.4	3.5	3.8	3.9			527	9.8	9.8	9.9	10.5	11.2	12	12.3	12.8	13	13.2	13.3	13.9	14.1	14.1	14.5	15.3	15.6	16.1	16.5	17.2	17.4
	535	2.2	0.5	0.5	0.45	0.65	0.85	1	1.1	1.2	1.35	1.65	1.95	2.15	2.25	2.55	2.75	2.85	3.05	3.2	3.5	3.5	3.6	3.8	3.9			535	9.9	9.9	10	10.5	11.3	12.2	12.7	13	13.2	13.3	13.45	14	14.3	14.3	15	15.8	16.2	16.7	17.2	17.1	17.5
	536	2.1	0.4	0.45	0.6	0.85	0.9	1.1	1.25	1.3	1.5	1.65	2	2.25	2.3	2.55	2.65	2.8	3.05	3.15	3.35	3.45	3.5	3.75	3.85			536	10.4	10.4	10.5	10.6	11.6	12.4	12.7	13.1	13.3	13.5	13.6	14.2	14.5	14.6	15.1	13.9	16.2	16.7	17	16.6	17.1
	538	2.2	0.4	0.45	0.5	0.75	0.9	1.15	1.25	1.4	1.5	1.65	2.05	2.2	2.3	2.7	2.7	2.9	2.95	3.1	3.2	3.3	3.5	3.75	3.85			538	10	10	10.1	10.9	11.5	12.3	12.8	13.1	13.2	13.3	13.3	14	14.3	14.3	14.9	15.7	15.9	16.2	16.6	16.7	17.3
	539	1.9	0.4	0.45	0.45	0.75	0.7	0.85	1.1	1.15	1.3	1.45	1.8	2.05	2.15	2.45	2.5	2.8	2.9	3	3.1	3.2	3.3	3.5	3.7			539	8.9	8.9	8.9	9.3	10	10.5	10.9	11.1	11.3	11.3	11.5	12.2	12.5	12.6	13.1	13.6	13.9	16.2	14.6	14.8	15.2
	512	2.2	0.4	0.6	0.6	0.8	0.95	1.15	1.25	1.25	1.45	1.6	2.1	2.3														512	10.2	10.2	10.2	11.4	12	12.4	12.75	13.1	13.2	13.3	13.5	14.1	14.2	14.2
	514	2.4	0.5	0.55	0.55	0.8	0.8	1.05	1.15	1.25	1.35	1.6	1.95	2.25														514	11	11	11	11.3	12.1	12.6	13.4	13.6	13.8	13.9	13.9	14.5	14.7	14.9
	517	2.3	0.45	0.5	0.5	0.7	0.8	1	1.1	1.15	1.25	1.4	1.95	2.2														517	10.5	10.5	10.6	10.9	11.2	11.6	12.2	12.6	12.6	12.9	13	13.4	13.8	14
	521	2.2	0.4	0.4	0.45	0.7	0.8	1.1	1.2	1.3	1.5	1.7	2.1	2.25														521	10.1	10.1	10.2	11.7	12.4	12.7	13.3	13.4	13.7	13.8	14	14.6	14.8	14.9
	528	2.3	0.4	0.45	0.55	0.85	1	1.15	1.35	1.45	1.65	1.85	2.25	2.4														528	10.6	10.6	10.6	12	12.7	13.1	13.6	14.2	14.3	14.3	14.4	15	15.2	15.3
	529	2.1	0.5	0.55	0.55	0.8	0.8	1	1.15	1.15	1.3	1.5	2	2.25														529	9.4	9.4	9.6	11.6	12.4	12.9	13.6	13.5	13.7	13.9	14	14.5	14.8	14.8
	532	2.3	0.4	0.4	0.5	0.7	0.9	1.15	1.2	1.3	1.4	1.6	2	2.35														532	10.8	10.8	10.9	11.3	12.2	12.5	12.8	13.3	13.5	13.5	13.7	14.3	14.5	14.5
	511	2	0.4	0.4	0.65	0.9	1	1.1	1.3	1.4	1.55	1.7	2.15	2.3														511	9.9	9.9	10	11.1	11.8	12.1	12.6	13	13.2	13.2	13.3	13.6	13.8	13.9
	515	2.2	0.4	0.45	0.45	0.65	0.7	1	1.1	1.15	1.3	1.5	1.95	2.15														515	9.8	9.8	9.9	10.6	11.6	12.2	12.8	12.9	13	13	13.3	13.8	14	14.1
	530	2.3	0.45	0.5	0.5	0.8	0.9	1.1	1.15	1.3	1.45	1.65	1.9	2.2														530	11.1	11.1	11.2	10.9	11.6	12.1	12.5	12.8	13	13.1	13.4	13.9	14.1	14.3
	531	2.3	0.5	0.55	0.6	0.85	0.9	1.05	1.3	1.35	1.45	1.6	2.1	2.25														531	10.9	10.9	11.1	11.1	11.9	12.6	13	13.3	13.5	13.6	13.7	14.4	14.6	14.6
	533	2.1	0.45	0.5	0.6	0.85	0.95	1.05	1.25	1.35	1.45	1.7	2.05	2.35	2.4	2.55	2.8	2.85	3.1	3.3								533	10	10	10.2	10.8	11.4	12.2	12.5	12.9	13.2	13.5	13.6	14.2	14.3	14.3	14.9	15.6	15.9	16.1	16.6	16.9
	534	2.3	0.5	0.6	0.6	0.85	0.9	1.05	1.2	1.3	1.45	1.65	2.05	2.25	2.35	2.65	2.9	3	3.15	3.3								534	10.5	10.5	10.5	11.1	12	12.5	13	13.4	13.4	13.7	13.7	14.4	14.6	14.6	15.3	15.8	16.1	16.5	16.9	17.2
	537	2.4	0.4	0.45	0.6	0.8	1.05	1.15	1.3	1.35	1.5	1.7	2	2.2	2.35	2.65	2.8	2.9	3.1	3.4								537	10.5	10.5	10.6	11.3	11.8	12.6	12.9	13.3	13.5	13.6	13.9	14.4	14.5	14.7	15.2	15.8	16.1	16.6	16.9	16.9
	518	2.2	0.5	0.5	0.55	0.8	0.9	1	1.15	1.3	1.4	1.6	2.05	2.25	2.35	2.75	3	3.1	3.3	3.4								518	10.1	10.1	10.3	10.3	11	12	12.4	12.7	13	13.1	13.4	13.8	14.1	14.3	14.8	15.65	15.9	16.45	16.7	17.5
	525	2.2	0.5	0.55	0.45	0.7	0.8	1	1.1	1.2	1.4	1.5	2	2.1	2.25	2.5	2.7	2.8	3	3.1								525	10.3	10.3	10.4	10.7	11.3	12.2	12.5	12.7	13	13.1	13.3	14	14	14.2	14.8	15.4	15.7	16.2	16.5	17.4
	527	2.1	0.4	0.45	0.45	0.75	0.95	1.1	1.25	1.3	1.5	1.7	2.1	2.25	2.35	2.6	2.85	2.95	3.15	3.1	3.5	3.5	3.6	3.9	4			527	9.8	9.8	9.9	10.5	11.2	12	12.3	12.8	13	13.2	13.3	13.9	14.1	14.1	14.5	15.3	15.6	16.1	16.5	17.2	17.4
	535	2.1	0.5	0.6	0.45	0.65	0.8	1	1.1	1.2	1.35	1.6	2	2.15	2.25	2.6	2.85	2.9	3.1	3.3	3.6	3.65	3.7	3.9	4			535	9.9	9.9	10	10.5	11.3	12.2	12.7	13	13.2	13.3	13.45	14	14.3	14.3	15	15.8	16.2	16.7	17.2	17.1	17.5
	536	2.2	0.45	0.55	0.65	0.9	0.95	1.1	1.2	1.3	1.45	1.7	2	2.2	2.35	2.6	2.8	2.85	3.1	3.25	3.5	3.55	3.65	3.75	3.85			536	10.4	10.4	10.5	10.6	11.6	12.4	12.7	13.1	13.3	13.5	13.6	14.2	14.5	14.6	15.1	13.9	16.2	16.7	17	16.6	17.1
	538	2.2	0.5	0.6	0.6	0.85	0.9	1.1	1.2	1.3	1.45	1.65	1.95	2.2	2.3	2.6	2.75	2.9	3.1	3.2	3.3	3.4	3.5	3.8	3.85			538	10	10	10.1	10.9	11.5	12.3	12.8	13.1	13.2	13.3	13.3	14	14.3	14.3	14.9	15.7	15.9	16.2	16.6	16.7	17.3
	539	1.8	0.5	0.55	0.55	0.8	0.85	0.9	1.05	1.15	1.35	1.5	1.95	2.15	2.3	2.5	2.8	2.9	3.05	3.2	3.2	3.3	3.45	3.6	3.7			539	8.9	8.9	8.9	9.3	10	10.5	10.9	11.1	11.3	11.3	11.5	12.2	12.5	12.6	13.1	13.6	13.9	16.2	14.6	14.8	15.2
AVG		2.2	0.445238	0.497619	0.528571	0.777381	0.890476	1.05595	1.19286	1.2881	1.43571	1.62262	2.02857	2.22143	2.3125	2.59	2.78	2.8925	3.0775	3.205	3.355	3.425	3.53	3.755	3.86		AVG		10.2238	10.2238	10.319	10.9476	11.6667	12.2714	12.7262	13.0381	13.219	13.3381	13.4881	14.0571	14.2714	14.3571	14.76	15.255	15.75	16.375	16.55	16.83	16.9
SEM		0.0271855	0.00916644	0.0127098	0.0132343	0.0147213	0.0171143	0.015113	0.015447	0.0166987	0.017809	0.0192308	0.0172692	0.0152543	0.0157863	0.0202367	0.0296273	0.0208167	0.0238381	0.029761	0.0518813	0.0423281	0.0359011	0.0390512	0.0323179		SEM		0.10844	0.10844	0.109957	0.121014	0.123048	0.115223	0.123476	0.126147	0.124786	0.129041	0.124499	0.12191	0.117135	0.115651	0.175173	0.226509	0.194903	0.0645251	0.208045	0.212886	0.286744
Unamputated Controls
Limb Length (cm)	DPA (but not amputated)		0		7	14	20	24	28	31	35	38	48	52	56	63	72	77	84	91	97	104	111	128	146		Body Length (cm)	DPA (but not amputated)		0		7	14	20	24	28	31	35	38	48	52	56	63	72	77	84	91	97	104
	513		2.2		2.3	2.4	2.5	2.6	2.7	2.8	2.9	2.9	3	3.15	3.2	3.25	3.5	3.6	3.65	3.7	3.75	3.8	3.85	4	4.1			513		10		10.3	10.9	11.4	11.9	12.3	12.5	12.7	12.7	13.4	13.8	13.9	14.5	15.4	15.9	16.3	16.7	16.9	17.4
	516		2.1		2.3	2.4	2.5	2.6	2.6	2.8	2.9	2.9	3	3.1	3.1	3.2	3.4	3.5	3.75	3.8	3.85	3.9	4	4.1	4.1			516		10.1		10.8	11.6	12.2	12.7	13.2	13.3	13.5	13.7	14.4	14.6	14.7	15.5	16.2	16.7	17.1	17.5	17.75	18.3
	519		2		2.2	2.3	2.5	2.6	2.7	2.8	2.8	2.8	2.9	3.1	3.1	3.4	3.4	3.6	3.6	3.7	3.75	3.85	3.9	4.1	4.1			519		8.9		9.6	10.8	11.3	11.8	12.3	12.4	12.6	12.8	13.4	13.7	13.8	14.5	15.4	15.8	16.2	16.7	17	17.4
	520		2		2.1	2.4	2.5	2.6	2.6	2.7	2.75	2.8	2.9	2.95	3	3.3	3.2	3.3	3.5	3.6	3.7	3.7	3.8	3.9				520		9.5		10.3	11.1	11.7	12.4	12.6	12.8	12.9	13	13.6	13.9	13.9	14.5	15.3	15.7	16	16.5	16.8	17.2
	522		2.1		2.3	2.4	2.5	2.6	2.7	2.8	2.8	2.8	2.9	3.1	3.1	3.3	3.4	3.4	3.4	3.55	3.6	3.65	3.8	3.85	4			522		9.6		10.5	11.1	11.8	12.2	12.6	12.8	12.8	13	13.6	13.8	13.9	14.4	15	15.4	15.8	16.2	16.4	16.8
	523		1.9		2.1	2.2	2.3	2.5	2.7	2.8	2.8	2.8	2.9	3.05	3.1	3.35	3.4	3.4	3.5	3.55	3.65	3.75	3.8	4	4.05			523		8.8		9.4	10.1	10.8	11.5	12	12.2	12.3	12.5	13.2	13.5	13.6	14.3	15.1	15.3	15.8	16.3	16.4	16.9
	524		2		2.1																							524		9.6		10.3
	513		2.2		2.3	2.5	2.6	2.7	2.7	2.8	2.9	2.9	3	3.1	3.15	3.35	3.5	3.6	3.7	3.9	3.9	4	4	4.05	4.1			513		10		10.3	10.9	11.4	11.9	12.3	12.5	12.7	12.7	13.4	13.8	13.9	14.5	15.4	15.9	16.3	16.7	16.9	17.4
	516		2.2		2.3	2.5	2.6	2.7	2.7	2.9	2.9	2.9	3	3.15	3.2	3.3	3.3	3.5	3.8	3.9	3.9	4	4.05	4.15	4.15			516		10.1		10.8	11.6	12.2	12.7	13.2	13.3	13.5	13.7	14.4	14.6	14.7	15.5	16.2	16.7	17.1	17.5	17.75	18.3
	519		1.9		2.2	2.3	2.5	2.7	2.7	2.8	2.8	2.8	2.9	3.1	3.15	3.45	3.35	3.5	3.7	3.7	3.75	3.9	4	4.2	4.25			519		8.9		9.6	10.8	11.3	11.8	12.3	12.4	12.6	12.8	13.4	13.7	13.8	14.5	15.4	15.8	16.2	16.7	17	17.4
	520		2.1		2.2	2.5	2.5	2.7	2.7	2.7	2.75	2.8	2.9	3.1	3.2	3.4	3.5	3.6	3.8	3.85	3.85	3.9	3.95	4.1				520		9.5		10.3	11.1	11.7	12.4	12.6	12.8	12.9	13	13.6	13.9	13.9	14.5	15.3	15.7	16	16.5	16.8	17.2
	522		2.1		2.3	2.5	2.5	2.6	2.7	2.8	2.8	2.8	2.9	3.2	3.2	3.4	3.3	3.5	3.6	3.6	3.7	3.85	3.85	3.95	4			522		9.6		10.5	11.1	11.8	12.2	12.6	12.8	12.8	13	13.6	13.8	13.9	14.4	15	15.4	15.8	16.2	16.4	16.8
	523		1.9		2.1	2.2	2.3	2.5	2.6	2.7	2.7	2.8	2.9	3	3.05	3.4	3.4	3.4	3.55	3.65	3.7	3.85	3.85	4	4.1			523		8.8		9.4	10.1	10.8	11.5	12	12.2	12.3	12.5	13.2	13.5	13.6	14.3	15.1	15.3	15.8	16.3	16.4	16.9
	524		2.1		2.2																							524		9.6		10.3
AVG			2.05714		2.21429	2.38333	2.48333	2.61667	2.675	2.78333	2.81667	2.83333	2.93333	3.09167	3.12917	3.34167	3.3875	3.49167	3.62917	3.70833	3.75833	3.84583	3.90417	4.03333	4.095		AVG			9.5		10.1714	10.9333	11.5333	12.0833	12.5	12.6667	12.8	12.95	13.6	13.8833	13.9667	14.6167	15.4	15.8	16.2	16.65	16.875	17.3333
SEM			0.0291157		0.0231031	0.0321769	0.0270615	0.0207194	0.0130558	0.0166667	0.0197842	0.0142134	0.0142134	0.0192996	0.018928	0.0211715	0.0262022	0.028758	0.0366486	0.0368419	0.0280917	0.0310537	0.026442	0.0297294	0.0229129		SEM			0.127529		0.127283	0.135587	0.132192	0.119869	0.112815	0.106837	0.110096	0.113818	0.11547	0.103597	0.103962	0.121127	0.116775	0.137069	0.133712	0.127624	0.137	0.147367
Ttest - pvalue			6.71249e-57		4.63178e-57	5.1227e-50	3.45084e-49	2.14391e-52	8.11484e-49	2.50386e-48	1.97074e-44	1.60734e-42	5.6632e-35	2.57711e-36	6.28645e-26	3.66216e-22	2.89783e-16	1.76637e-17	1.09324e-14	4.43733e-13	6.22108e-07	8.2082e-08	4.01321e-08	1.20603e-05	1.29602e-05		Ttest - pvalue			3.09331e-05		2.63192e-05	0.000205065	4.66405e-05	0.000608087	0.00354801	0.00245725	0.00367103	0.00272928	0.0104867	0.0215714	0.0191133	0.478751	0.56153	0.821107	0.16563	0.662249	0.853419	0.173163
[truncated: 53 more columns]
