# Supplementary material for: Neural control of growth and size in the axolotl limb regenerate
Source: eLife journal article supplement (doi:10.7554/elife.68584), 2021-11-15
Supplement: supp [file elife_poa_e68584_Figure_1_source_data_2.xlsx]

## Sheet: Sheet1
4cm animals
Limb Length (cm)	DPA	0	0	21	23	30	34	44	48	51	69	76		Growth Rate (cm/day)	DPA	0	0	21	23	30	34	44	48	51	69	76
	Unamputated	1		1.3	1.4	1.8	1.9	2.1	2.1	2.2	2.4	2.7			Unamputated			0.0142857	0.05	0.0571429	0.025	0.02	0	0.0333333	0.0111111	0.0428571
		0.8		1.4	1.5	1.7	1.9	2.1	2.4	2.2	2.7	2.8						0.0285714	0.05	0.0285714	0.05	0.02	0.075	-0.0666667	0.0277778	0.0142857
		1.1		1.6	1.5	1.8	1.9	2.2	2.2	2.3	2.7	2.8						0.0238095	-0.05	0.0428571	0.025	0.03	0	0.0333333	0.0222222	0.0142857
		0.9		1.4	1.8	2.1	2.1	2.4	2.7	2.4	2.8	3.1						0.0238095	0.2	0.0428571	0	0.03	0.075	-0.1	0.0222222	0.0428571
		1.1		1.4	1.4	1.8	1.9	2	2.2	2.2	2.6	2.7						0.0142857	0	0.0571429	0.025	0.01	0.05	0	0.0222222	0.0142857
		1.1		1.2	1.3	1.7	1.8	1.8	2	1.9	2.1	2.2						0.0047619	0.05	0.0571429	0.025	0	0.05	-0.0333333	0.0111111	0.0142857
		0.9		1.5	1.6	2.1	2.2	2.3	2.6	2.5	3	3.3						0.0285714	0.05	0.0714286	0.025	0.01	0.075	-0.0333333	0.0277778	0.0428571
		0.9		1.3	1.6	2	2	2.2	2.5	2.5	2.8	2.9						0.0190476	0.15	0.0571429	0	0.02	0.075	0	0.0166667	0.0142857
		1		1.7	1.7	2.1	2.2	2.5	2.6	2.5	2.8	3						0.0333333	0	0.0571429	0.025	0.03	0.025	-0.0333333	0.0166667	0.0285714
		1.2		1.6	1.9	2.1	2.3	2.4	2.6	2.5	3	2.9						0.0190476	0.15	0.0285714	0.05	0.01	0.05	-0.0333333	0.0277778	-0.0142857
		1		1.6	1.8	1.9	2.1	2.3	2.4	2.4	2.8	3						0.0285714	0.1	0.0142857	0.05	0.02	0.025	0	0.0222222	0.0285714
		1.4		1.8	2	2.4	2.3	2.6	2.7									0.0190476	0.1	0.0571429	-0.025	0.03	0.025
		1		1.7	1.9	2.2	2.2	2.3	2.4	2.6	2.8	2.8						0.0333333	0.1	0.0428571	0	0.01	0.025	0.0666667	0.0111111	0
		1.2		1.4	1.7	1.9	2.1	2.1	2.2	2.2	2.7	2.8						0.00952381	0.15	0.0285714	0.05	0	0.025	0	0.0277778	0.0142857
		1.1		1.5	1.6	2	2	2.2	2.4	2.3	2.7	2.9						0.0190476	0.05	0.0571429	0	0.02	0.05	-0.0333333	0.0222222	0.0285714
		1		1.4	1.8	1.8	2	2	2.2	2.2	2.8	3						0.0190476	0.2	0	0.05	0	0.05	0	0.0333333	0.0285714
		1.2		1.7	1.6	1.9	2.1	2.2	2.4	2.4	2.7	2.7						0.0238095	-0.05	0.0428571	0.05	0.01	0.05	0	0.0166667	0
		0.9		1.6	1.8	2.1	2	2.2	2.4	2.4	2.7	3						0.0333333	0.1	0.0428571	-0.025	0.02	0.05	0	0.0166667	0.0428571
		1.4		1.8	1.8	2.1	2.2	2.2	2.5	2.4	2.8	2.9						0.0190476	0	0.0428571	0.025	0	0.075	-0.0333333	0.0222222	0.0142857
		0.7		1.3	1.5	1.7	1.8	2	2.1	2.1	2.5	2.8						0.0285714	0.1	0.0285714	0.025	0.02	0.025	0	0.0222222	0.0428571
	AVG	1.045	#DIV/0!	1.51	1.66	1.96	2.05	2.205	2.38	2.32632	2.70526	2.85789			AVG	#DIV/0!	#DIV/0!	0.0221429	0.075	0.0428571	0.0225	0.0155	0.04375	-0.0122807	0.0210526	0.0218045
	Sdev	0.179106	#DIV/0!	0.177408	0.190291	0.190291	0.153897	0.187715	0.206729	0.172698	0.204053	0.219382			Sdev	#DIV/0!	#DIV/0!	0.00791936	0.0734489	0.0173422	0.0241977	0.0105006	0.0241636	0.0372024	0.00630145	0.016747
	SEM	0.0400493	#DIV/0!	0.0396697	0.0425503	0.0425503	0.0344124	0.0419743	0.046226	0.0396196	0.0468129	0.0503298			SEM	#DIV/0!	#DIV/0!	0.00177082	0.0164237	0.00387783	0.00541076	0.00234801	0.00540315	0.00853481	0.00144565	0.00384203
	Regenerating	1	0.2	0.3	0.4	0.5	0.7	1.3	1.5	1.5	2.3	2.5			Regenerating			0.0047619	0.05	0.0142857	0.05	0.06	0.05	0	0.0444444	0.0285714
		0.9	0.2	0.3	0.4	0.6	0.7	1.4	1.7	1.8	2.5	2.6						0.0047619	0.05	0.0285714	0.025	0.07	0.075	0.0333333	0.0388889	0.0142857
		0.6	0.2	0.4	0.5	0.7	0.9	1.4	1.5	1.7	2.3	2.4						0.00952381	0.05	0.0285714	0.05	0.05	0.025	0.0666667	0.0333333	0.0142857
		1	0.2	0.5	0.5	0.6	0.9	1.5	1.9	1.9	2.4	2.8						0.0142857	0	0.0142857	0.075	0.06	0.1	0	0.0277778	0.0571429
		1.2	0.2	0.5	0.5	0.6	0.8	1.3	1.6	1.7	2.2	2.5						0.0142857	0	0.0142857	0.05	0.05	0.075	0.0333333	0.0277778	0.0428571
		1.2	0.2	0.3	0.6	0.7	0.7	1.4	1.7	1.5	2	2.3						0.0047619	0.15	0.0142857	0	0.07	0.075	-0.0666667	0.0277778	0.0428571
		0.9	0.2	0.5	0.6	0.8	0.9	1.5	1.8	1.7	2.4	2.8						0.0142857	0.05	0.0285714	0.025	0.06	0.075	-0.0333333	0.0388889	0.0571429
		1.2	0.2	0.6	0.5	0.8	0.9	1.4	1.8	1.8	2.4	2.7						0.0190476	-0.05	0.0428571	0.025	0.05	0.1	0	0.0333333	0.0428571
		1.1	0.2	0.6	0.5	0.9	0.8	1.5	1.9	1.8	2.5	2.6						0.0190476	-0.05	0.0571429	-0.025	0.07	0.1	-0.0333333	0.0388889	0.0142857
		1.1	0.2	0.6	0.6	0.8	1	1.5	1.8	1.8	2.4	2.6						0.0190476	0	0.0285714	0.05	0.05	0.075	0	0.0333333	0.0285714
		0.7	0.2	0.4	0.4	0.6	0.6	1.4	1.7	1.7	2.5	2.6						0.00952381	0	0.0285714	0	0.08	0.075	0	0.0444444	0.0142857
		1.3	0.2	0.6	0.4	0.6	0.6	0.8	0.7									0.0190476	-0.1	0.0285714	0	0.02	-0.025
		1.1	0.2	0.6	0.5	0.9	0.9	1.5	1.7	1.8	2.6	2.9						0.0190476	-0.05	0.0571429	0	0.06	0.05	0.0333333	0.0444444	0.0428571
		1.1	0.2	0.5	0.6	0.8	0.8	1.3	1.4	1.7	2.4	2.5						0.0142857	0.05	0.0285714	0	0.05	0.025	0.1	0.0388889	0.0142857
		1.2	0.2	0.6	0.5	0.8	0.8	1.4	1.7	1.8	2.4	2.7						0.0190476	-0.05	0.0428571	0	0.06	0.075	0.0333333	0.0333333	0.0428571
		0.5	0.2	0.4	0.5	0.7	0.8	1.3	1.6	1.8	2.5	2.6						0.00952381	0.05	0.0285714	0.025	0.05	0.075	0.0666667	0.0388889	0.0142857
		1.2	0.2	0.5	0.7	0.8	0.9	1.5	1.7	1.9	2.4	2.6						0.0142857	0.1	0.0142857	0.025	0.06	0.05	0.0666667	0.0277778	0.0285714
		1	0.2	0.6	0.7	0.8	0.8	1.5	1.7	1.7	2.5	2.6						0.0190476	0.05	0.0142857	0	0.07	0.05	0	0.0444444	0.0142857
		1.2	0.2	0.6	0.5	0.8	0.8	1.3	1.8	1.8	2.5	2.6						0.0190476	-0.05	0.0428571	0	0.05	0.125	0	0.0388889	0.0142857
		0.6	0.2	0.4	0.4	0.6	0.8	1.3	1.6	1.6	2.2	2.4						0.00952381	0	0.0285714	0.05	0.05	0.075	0	0.0333333	0.0285714
	AVG	1.005	0.2	0.49	0.515	0.72	0.805	1.375	1.64	1.73684	2.38947	2.59474			AVG	#DIV/0!	#DIV/0!	0.0138095	0.0125	0.0292857	0.02125	0.057	0.06625	0.0157895	0.0362573	0.0293233
	Sdev	0.235025	2.84766e-17	0.111921	0.0933302	0.115166	0.105006	0.158529	0.256289	0.111607	0.141007	0.147097			Sdev	#DIV/0!	#DIV/0!	0.00532957	0.0604261	0.013493	0.0259997	0.0126074	0.0327219	0.0406254	0.00596297	0.015411
	SEM	0.0525532	6.36757e-18	0.0250263	0.0208693	0.0257519	0.0234801	0.0354483	0.057308	0.0256044	0.0323493	0.0337463			SEM	#DIV/0!	#DIV/0!	0.00119173	0.0135117	0.00301714	0.00581372	0.00281911	0.00731684	0.0093201	0.001368	0.00353552
	TTEST	0.548525	1.39345e-22	4.81355e-23	1.14818e-24	3.7255e-25	5.27961e-28	1.19341e-17	2.96711e-12	1.17806e-14	2.77993e-06	0.000109594			TTEST	#DIV/0!	#DIV/0!	0.000374889	0.00557676	0.00879797	0.87577	9.97473e-14	0.0179545	0.0327175	4.84839e-09	0.158495
note: data from 10 cm animals is located in Figure 1-source data 1
20cm animals
Limb Length (cm)	DPA	0	0	30	44	63	77	89	112	128	200			Growth Rate (cm/day)	DPA	0	0	30	44	63	77	89	112	128	200
	Unamputated	3.3		3.1	3.7	3.4	3.9	4	4.1	4.3	4.25				Unamputated			-0.00952381	0.3	-0.0428571	0.125	0.01	0.025	0.0666667	-0.00277778
		3.1		3.2	3.3	3.3	3.6	3.8	3.7	4.1	4.25							0.0047619	0.05	0	0.075	0.02	-0.025	0.133333	0.00833333
		3		3.4	3.2	3.6	3.7	4	3.9	4.2	4.2							0.0190476	-0.1	0.0571429	0.025	0.03	-0.025	0.1	0
		3.3		3.2	3.5	3.4	3.8	3.9	3.8	4.1	4.25							-0.0047619	0.15	-0.0142857	0.1	0.01	-0.025	0.1	0.00833333
		3.7		3.8	3.8	3.9	4.1	4.4	4.2	4.5	4.4							0.0047619	0	0.0142857	0.05	0.03	-0.05	0.1	-0.00555556
		3		3.5	3.6	3.4	3.9	3.8	3.9	4.1	4.5							0.0238095	0.05	-0.0285714	0.125	-0.01	0.025	0.0666667	0.0222222
		3.4		3.4	3.85	3.6	4.1	4.2	4.2	4.4	4.2							-2.11471e-17	0.225	-0.0357143	0.125	0.01	0	0.0666667	-0.0111111
		3.7		3.4	3.8	3.7	4.1	4	4.2	4.3	4.25							-0.0142857	0.2	-0.0142857	0.1	-0.01	0.05	0.0333333	-0.00277778
		3		2.8	3.3	3.4	3.6	3.6	3.6	3.9	4.2							-0.00952381	0.25	0.0142857	0.05	0	0	0.1	0.0166667
		3		3.3	3.4	3.4	3.8	3.8	3.9	4.1	4.55							0.0142857	0.05	0	0.1	0	0.025	0.0666667	0.025
	AVG	3.25		3.31	3.545	3.51	3.86	3.95	3.95	4.2	4.305				AVG			0.00285714	0.1175	-0.005	0.0875	0.009	0	0.0833333	0.00583333
	Sdev	0.279881		0.264365	0.238572	0.185293	0.195505	0.227303	0.217307	0.176383	0.130064				Sdev			0.0129343	0.126957	0.029364	0.035843	0.0144914	0.0311805	0.0283279	0.0123152
	SEM	0.0885061		0.0835996	0.0754431	0.0585947	0.0618241	0.0718795	0.0687184	0.0557773	0.0411299				SEM			0.00409019	0.0401473	0.00928571	0.0113346	0.00458258	0.00986013	0.00895806	0.0038944
	Regenerating	3.6	0.75	1.2	1.75	2.4	3	3.3	3.5	3.7	4.25				Regenerating			0.015	0.0392857	0.0342105	0.0428571	0.025	0.00869565	0.0125	0.00763889
		3.6	0.6	0.9	1.3	2.1	2.6	2.9	3.1	3.5	4.25							0.01	0.0285714	0.0421053	0.0357143	0.025	0.00869565	0.025	0.0104167
		3.4	0.55	1.2	1.4	2.2	2.8	3	3.4	3.5	4.2							0.0216667	0.0142857	0.0421053	0.0428571	0.0166667	0.0173913	0.00625	0.00972222
		3.3	0.6	1.1	1.4	1.9	2.7	3.1	3.3	3.4	4.25							0.0166667	0.0214286	0.0263158	0.0571429	0.0333333	0.00869565	0.00625	0.0118056
		3.7	0.6	1.1	1.6	2.2	3	3.2	3.3	3.5	4.35							0.0166667	0.0357143	0.0315789	0.0571429	0.0166667	0.00434783	0.0125	0.0118056
		3.2	0.65	1.1	1.6	2.1	2.8	3.4	3.5	3.7	4.5							0.015	0.0357143	0.0263158	0.05	0.05	0.00434783	0.0125	0.0111111
		3.7	0.7	1.1	1.6	2.4	2.9	3.1	3.6	3.6	4.2							0.0133333	0.0357143	0.0421053	0.0357143	0.0166667	0.0217391	0	0.00833333
		3.65	0.7	1.3	1.8	2.3	3.2	3.3	3.4	3.6	4.2							0.02	0.0357143	0.0263158	0.0642857	0.00833333	0.00434783	0.0125	0.00833333
		2.9	0.5	1	1.7	1.9	2.7	2.9	3.3	3.6	4.2							0.0166667	0.05	0.0105263	0.0571429	0.0166667	0.0173913	0.01875	0.00833333
		3.2	0.7	1	1.6	1.8	2.8	3.1	3.2	3.6	4.5							0.01	0.0428571	0.0105263	0.0714286	0.025	0.00434783	0.025	0.0125
	AVG	3.425	0.635	1.1	1.575	2.13	2.85	3.13	3.36	3.57	4.29				AVG			0.0155	0.0339286	0.0292105	0.0514286	0.0233333	0.01	0.013125	0.01
	Sdev	0.270031	0.0783511	0.11547	0.162019	0.211082	0.177951	0.170294	0.150555	0.0948683	0.119722				Sdev			0.00377205	0.0102754	0.0117982	0.0120468	0.0116534	0.00649754	0.00804177	0.00176898
	SEM	0.0853913	0.0247768	0.0365148	0.0512348	0.0667499	0.0562731	0.0538516	0.0476095	0.03	0.0378594				SEM			0.00119283	0.00324937	0.00373091	0.00380952	0.00368514	0.0020547	0.00254303	0.0005594
	Ttest - Pvalue	0.171851	2.04173e-16	3.44062e-15	2.53705e-14	7.1444e-12	4.52575e-10	3.55617e-08	1.39206e-06	9.6859e-09	0.791498				Ttest - Pvalue			0.00824928	0.0526158	0.00306275	0.0074127	0.0253936	0.33394	5.64126e-07	0.303585
Figure 1C
4cm						10cm				20cm
DPA	Limb Length	SEM	Growth Rate	SEM		DPA	Limb Length	Growth Rate		DPA		Limb Length	Growth Rate
0	1.005	0.0525532				0	2.2			0		4
0	0.2	6.36757e-18	0			0	0.445238	0		0		0.635	0		Blastema Stage
21	0.49	0.0250263	0.0138095	0.00119173		2	0.497619	0.0261905		30		1.1	0.0155		Early Tiny Limb Stage
23	0.515	0.0208693	0.0125	0.0135117		7	0.528571	0.00619048		44		1.575	0.0339286		Late Tiny Limb Stage
30	0.72	0.0257519	0.0292857	0.00301714		14	0.777381	0.0177721		63		2.13	0.0292105
34	0.805	0.0234801	0.02125	0.00581372		20	0.890476	0.0188492		77		2.85	0.0514286
44	1.375	0.0354483	0.057	0.00281911		24	1.05595	0.041369		89		3.13	0.0233333
48	1.64	0.057308	0.06625	0.00731684		28	1.19286	0.0342262		112		3.36	0.01
51	1.73684	0.0256044	0.0157895	0.0093201		31	1.2881	0.031746		128		3.57	0.013125
69	2.38947	0.0323493	0.0362573	0.001368		35	1.43571	0.0369048		200		4.29	0.01
76	2.59474	0.0337463	0.0293233	0.00353552		38	1.62262	0.0267007
						48	2.02857	0.0405952
						52	2.22143	0.0482143
						56	2.30357	0.0205357
						63	2.59	0.0396429
						72	2.78	0.0201058
						77	2.8925	0.0214286
						84	3.0775	0.0251701
						91	3.205	0.0173469
						97	3.3375	0.0210317
						104	3.425	0.00909091
						111	3.53	0.0136364
						128	3.755	0.0120321
						146	3.86	0.00530303
