# Supplementary material for: Neural control of growth and size in the axolotl limb regenerate
Source: eLife journal article supplement (doi:10.7554/elife.68584), 2021-11-15
Supplement: supp [file elife_poa_e68584_Figure_2_source_data_1.xlsx]

## Sheet: Source data
Figure 2A - Cell Proliferation in the Epidermis						Figure 2A - Cell Proliferation in the Soft Tissue						Figure 2A - Cell Proliferation in the Skeleton
Regeneration Stage	Unamputated Limb	Early Tiny Limb	Late Tiny Limb	Fully Regenerated Limb		Regeneration Stage	Unamputated Limb	Early Tiny Limb	Late Tiny Limb	Fully Regenerated Limb		Regeneration Stage	Unamputated Limb	Early Tiny Limb	Late Tiny Limb	Fully Regenerated Limb
Avg. labeling index from biological replicate	1.35203	6.69371	9.83726	2.04082		Avg. labeling index from biological replicate	1.09339	4.68898	3.17744	1.56613		Avg. labeling index from biological replicate	0	0.240385	0	0
	2.00094	6.78074	9.86908	2.33903			1.36889	5.49344	3.61506	1.59574			0.45045	1.49254	0	0
	2.00211	7.75281	9.89937	2.44476			1.95306	5.75565	3.84422	2.12238			0.930233	1.82371	0	0.757576
	2.39472	9.13621	9.90618	2.51711			2.41461	6.44025	3.89807	2.29508			0.966184	2.26131	0	0.78125
	2.56917	9.17508	10.3298	3.1967			2.53275	6.51397	4.4201	3.09061			0.990099	2.66667	0.473934	1.2987
	3.55889	10.1175	10.6992	4.62085			2.69268	7.39576	4.55537	3.27681			1.36986	2.8169	0.543478	1.35501
	3.62255	11.3653	10.8198				2.92602	7.9572	4.73538				2.0202	2.94118	0.840336
		12.7935	12.6256					8.1413	4.91921					2.95858	2.20264
			13.8917					9.92436	5.88966					4	2.39044
Avg.	2.50006	9.22685	10.8753	2.85988		Avg.	2.1402	6.92343	4.33939	2.32446		Avg.	0.961004	2.3557	0.716759	0.698757
Stdev	0.837857	2.16039	1.43506	0.943021		Stdev	0.692566	1.60402	0.81119	0.726875		Stdev	0.642272	1.07418	0.946592	0.59622
SEM	0.31668	0.763812	0.478352	0.384987		SEM	0.261765	0.534674	0.270397	0.296746		SEM	0.242756	0.35806	0.315531	0.243406
ANOVA P-Value		4.8196e-12				ANOVA P-Value		2.7698e-09				ANOVA P-Value		0.0013
TUKEY Pvalues						TUKEY Pvalues						TUKEY Pvalues
Comparison:		P-Value	Indication in Figure			Comparison:		P-Value	Indication in Figure			Comparison:		P-Value	Indication in Figure
Intact-ETL		0.0010053	**			Intact-ETL		0.0010053	**			Intact-ETL		0.0188518	*
Intact-LTL		0.0010053	**			Intact-LTL		0.0020797	**			Intact-LTL		0.899995	N.S.
Intact-Regen		0.899995	N.S.			Intact-Regen		0.899995	N.S.			Intact-Regen		0.899995	N.S.
ETL-LTL		0.129948	N.S.			ETL-LTL		0.0010053	**			ETL-LTL		0.002515	**
ETL-Regen		0.0010053	**			ETL-Regen		0.0010053	**			ETL-Regen		0.0066053	*
LTL-Regen		0.0010053	**			LTL-Regen		0.00744	*			LTL-Regen		0.899995	N.S.
Figure 2B - Cell Death in the Epidermis						Figure 2B - Cell Death in the Soft Tissue						Figure 2B - Cell Death in the Skeleton
Regeneration Stage	Unamputated Limb	Early Tiny Limb	Late Tiny Limb	Fully Regenerated Limb		Regeneration Stage	Unamputated Limb	Early Tiny Limb	Late Tiny Limb	Fully Regenerated Limb		Regeneration Stage	Unamputated Limb	Early Tiny Limb	Late Tiny Limb	Fully Regenerated Limb
Avg. % TUNEL Positive from biological replicate	1.42816	0.408859	0.999487	2.21563		Avg. % TUNEL Positive from biological replicate	2.00164	1.0351	0.28023	4.16412		Avg. % TUNEL Positive from biological replicate	5.07614	0.900901	1.18343	5.90717
	1.61987	0.582298	0.568182	2.52749			3.65684	1.5136	0.571732	4.89474			6.98925	0.316456	1.36364	8.13953
	1.63358	0.675139	1.50192	2.98876			4.47445	1.60416	1.04235	4.9761			8.18966	0	2.0979	8.15603
	1.73568		1.30571	1.85502			4.5176		1.46606	5.30527			9.27835		2.20264	8.38323
	1.90527		1.67057	2.30789			4.86258		2.16438	5.38989			9.94152		4.22535	8.96861
	2.51479		1.17918	2.05051			5.30484		2.85088	5.4914			11.1111		4.49438	9.55056
				1.57674						6.28391						9.79021
				1.46905						7.08196						10.0917
Avg.	1.80622	0.555432	1.20418	2.12389		Avg.	4.13633	1.38429	1.39594	5.44842		Avg.	8.431	0.405786	2.59456	8.62339
Stdev	0.380612	0.135158	0.390768	0.50129		Stdev	1.17808	0.305773	0.975849	0.892135		Stdev	2.17139	0.457045	1.42657	1.33011
SEM	0.155384	0.0780334	0.15953	0.177233		SEM	0.480949	0.176538	0.398389	0.315417		SEM	0.886466	0.263875	0.582395	0.470266
ANOVA P-Value		8.0838e-05				ANOVA P-Value		5.4812e-07				ANOVA P-Value		6.7936e-08
TUKEY Pvalues						TUKEY Pvalues						TUKEY Pvalues
Comparison:		P-Value	Indication in Figure			Comparison:		P-Value	Indication in Figure			Comparison:		P-Value	Indication in Figure
Intact-ETL		0.0022185	**			Intact-ETL		0.0034247	**			Intact-ETL		0.0010053	**
Intact-LTL		0.090628	N.S.			Intact-LTL		0.0010053	**			Intact-LTL		0.0010053	**
Intact-Regen		0.505308	N.S.			Intact-Regen		0.0863774	N.S.			Intact-Regen		0.899995	N.S.
ETL-LTL		0.15725	N.S.			ETL-LTL		0.899995	N.S.			ETL-LTL		0.231143	N.S.
ETL-Regen		0.0010053	**			ETL-Regen		0.0010053	**			ETL-Regen		0.0010053	**
LTL-Regen		0.0031564	**			LTL-Regen		0.0010053	**			LTL-Regen		0.0010053	**
Figure 2C - Cell Size in the Epidermis						Figure 2C - Cell Size in the Muscle						Figure 2C - Cell Size in the Skeleton							Unamputated Limb - Epidermis															Early Tiny Limb - Epidermis												Late Tiny Limb - Epidermis
Regeneration Stage	Unamputated Limb	Early Tiny Limb	Late Tiny Limb	Fully Regenerated Limb		Regeneration Stage	Unamputated Limb	Early Tiny Limb	Late Tiny Limb	Fully Regenerated Limb		Regeneration Stage	Unamputated Limb	Early Tiny Limb	Late Tiny Limb	Fully Regenerated Limb			Bio Rep 1			Bio Rep 2			Bio Rep 3			Bio Rep 4			Bio Rep 5			Bio Rep 1			Bio Rep 2			Bio Rep 3			Bio Rep 4			Bio Rep 1			Bio Rep 2
Avg.	304.438	220.347	333.681	320.195		Avg.	557.064	123.303	171.516	346.36		Avg.	617.894	322.707	507.576	715.941			Cell Areas	AVG	SEM	Cell Areas	AVG	SEM	Cell Areas	AVG	SEM	Cell Areas	AVG	SEM	Cell Areas	AVG	SEM	Cell Areas	AVG	SEM	Cell Areas	AVG	SEM	Cell Areas	AVG	SEM	Cell Areas	AVG	SEM	Cell Areas	AVG	SEM	Cell Areas
Stdev	525.171	224.666	523.759	490.294		Stdev	560.505	101.28	106.647	274.803		Stdev	374.377	234.367	311.533	417.502			198.469	226.84	19.9397	1974.03	311.75	37.6319	51.968	408.408	49.6054	91.577	328.897	53.3333	91.577	440.648	96.8485	521.471	205.362	17.0463	79.113	195.489	12.2871	140.587	207.215	23.2353	246.529	295.369	26.1813	186.956	261.464	31.7117	239.874
SEM	17.8152	9.91926	23.0796	21.6893		SEM	23.9874	4.99577	6.30616	15.787		SEM	20.0687	8.3017	11.368	20.6694			28.519			2702.1			90.943			217.799			115.765			1291.48			68.656			112.596			714.87			70.663			120.307
ANOVA P-Value		0.0004				ANOVA P-Value		1.1102e-16				ANOVA P-Value		1.1102e-16					144.073			1395.41			60.312			116.927			105.308			692.161			71.297			175.866			136.468			74.571			138.052
TUKEY Pvalues						TUKEY Pvalues						TUKEY Pvalues							113.019			536.892			139.531			72.353			168.261			740.748			147.769			184.633			146.079			44.891			154.741
Comparison:		P-Value	Indication in Figure			Comparison:		P-Value	Indication in Figure			Comparison:		P-Value	Indication in Figure				119.779			1507.59			100.027			62.424			70.029			1066.28			87.986			148.403			462.004			128.123			336.099
Intact-ETL		0.0071051	*			Intact-ETL		0.0010053	**			Intact-ETL		0.0010053	**				49.644			354.689			153.79			80.169			131.926			746.663			85.239			169.845			564.883			66.438			217.376
Intact-LTL		0.655919	N.S.			Intact-LTL		0.0010053	**			Intact-LTL		0.0010053	**				109.005			931.19			90.838			126.961			109.533			1323.9			30.737			83.866			91.894			67.072			329.973
Intact-Regen		0.899995	N.S.			Intact-Regen		0.0010053	**			Intact-Regen		0.0010053	**				177.873			146.079			32.638			40.454			19.752			383.102			41.088			113.124			176.288			113.969			223.925
ETL-LTL		0.00110053	**			ETL-LTL		0.307464	N.S.			ETL-LTL		0.0010053	**				184.316			85.662			60.523			205.335			78.902			669.134			83.233			144.918			212.201			123.053			218.116
ETL-Regen		0.0037382	**			ETL-Regen		0.0010053	**			ETL-Regen		0.0010053	**				103.935			53.763			157.276			59.678			55.031			821.974			158.543			119.356			78.796			77.951			217.799
LTL-Regen		0.899995	N.S.			LTL-Regen		0.0010053	**			LTL-Regen		0.0010053	**				176.922			121.68			1880.12			57.671			35.068			467.919			520.837			261.211			563.404			92.211			124.215
																			135.517			51.017			961.188			42.673			3115.51			536.786			147.347			127.278			845.211			77.951			2456.52
																			54.08			80.592			1750.1			31.054			3002.81			724.271			303.672			79.324			1229.69			55.348			1712.6
																			65.804			150.093			1897.45			58.305			1672.47			602.274			425.563			191.815			95.379			163.402			94.851
Figure 2D - ECM Size in the Epidermis						Figure 2D - ECM Size in the Muscle						Figure 2D - ECM Size in the Skeleton							42.884			132.876			1271.83			79.113			1996.84			102.245			146.291			221.812			121.997			117.561			112.068
Regeneration Stage	Unamputated Limb	Early Tiny Limb	Late Tiny Limb	Fully Regenerated Limb		Regeneration Stage	Unamputated Limb	Early Tiny Limb	Late Tiny Limb	Fully Regenerated Limb		Regeneration Stage	Unamputated Limb	Early Tiny Limb	Late Tiny Limb	Fully Regenerated Limb			108.054			105.731			484.924			132.982			64.22			58.516			488.833			102.034			145.34			60.523			1044.21
Normalized ECM Area	47.0025	59.5932	39.6523	48.7948		Normalized ECM Area	27.0882	45.8774	43.1988	36.0745		Normalized ECM Area	65.8388	75.5465	64.2	66.156			118.828			59.889			118.089			90.943			107.632			90.415			65.699			540.906			634.067			104.569			133.299
	39.3674	49.3067	39.4622	45.4259			31.2391	39.5559	47.8994	40.7912			65.5715	58.7068	64.0935	68.031			112.174			117.877			116.927			130.658			60.101			75.839			494.536			110.589			144.178			79.641			868.66
	34.8513	49.8885	43.9979	42.7231			49.6311	39.0653	38.4001	38.7018			68.2644	76.3934	82.2824	70.2915			178.189			86.084			106.259			2470.36			48.799			127.701			126.116			1893.22			952.421			82.282			123.687
	40.2269	37.2511	35.5702	41.5924			28.8459	44.8351					94.3695	75.0174	73.9149	65.7007			77.423			31.688			188.963			1961.24			60.206			107.209			31.159			1197.26			72.248			52.179			259.838
	38.8893			48.2874			36.7781						99.9831	78.5885	82.6719	61.9081			106.47			115.871			119.99			1645			72.142			47.531			148.826			184.844			137.629			211.673			91.049
													61.5317	74.7036	80.6917	61.5875			104.569			56.298			97.809			256.035			116.927			59.889			127.384			101.189			193.716			294.377			108.054
																			157.593			36.863			51.651			84.289			142.594			171.641			100.872			232.903			236.494			56.826			297.017
																			1284.51			37.391			103.407			75.311			259.943			98.865			162.874			70.769			62.741			72.987			150.304
																			85.768			108.899			84.817			102.984			119.251			113.758			121.574			249.486			1091.32			111.751			177.239
Avg.	40.0675	49.0099	39.6707	45.3647		Avg.	34.7165	42.3334	43.1661	38.5225		Avg.	78.8055	72.8505	73.4325	66.4175			190.442			113.019			92.105			113.758			70.241			57.249			76.578			161.184			140.481			35.596			84.183
Stdev	4.39338	9.14939	3.44396	3.22178		Stdev	9.10277	3.52198	4.74976	2.36346		Stdev	16.9198	8.02317	9.17029	3.10353			142.066			73.832			2131.62			125.588			106.998			68.868			549.884			99.71			96.013			84.817			915.452
SEM	1.96478	4.5747	1.72198	1.44083		SEM	4.07088	1.76099	2.74227	1.36454		SEM	7.56677	3.58807	4.10108	1.38794			155.163			121.891			1240.99			118.723			180.936			92.422			168.472			284.131			716.982			54.186			73.304
ANOVA P-Value		0.0692				ANOVA P-Value		0.24				ANOVA P-Value		0.3265					160.656			134.989			110.589			101.823			153.156			80.803			698.393			98.654			141.221			46.369			162.029
																			60.206			73.198			443.625			82.704			91.154			164.247			145.763			50.806			683.288			79.008			100.344
																			188.752			139.108			1400.9			51.334			67.494			106.998			87.352			271.879			26.618			137.524			104.78
																			76.367			175.338			1448.75			116.716			55.981			114.392			491.684			165.937			116.082			112.068			184.421
																			132.771			73.304			2216.75			47.003			77.106			214.841			192.766			121.046			41.722			115.554			283.498
																			89.993			203.751			1501.99			48.482			1518.89			127.278			220.756			148.509			81.331			92.211			164.669
																			76.473			1865.76			681.493			147.558			94.112			104.886			83.549			128.968			144.812			106.048			895.911
																			119.251			1355.38			926.754			74.782			57.883			136.89			200.899			127.912			198.047			120.307			1520.79
																			166.571			1146.24			1771.86			86.19			1708.8			159.494			54.608			99.182			233.854			97.386			798.208
																			64.22			625.089			52.707			109.322			2093.38			166.993			57.143			204.49			521.682			179.774			75.944
																			1106.11			36.124			74.043			37.919			77.634			208.398			637.447			146.819			150.621			79.641			162.029
																			77.318			137.524			103.618			39.504			67.283			106.259			130.13			71.191			932.457			205.758			235.121
																			121.786			82.388			46.264			106.153			99.182			142.171			203.328			169.317			111.118			179.985			154.001
																			112.068			169.317			81.437			82.282			84.5			133.51			65.487			154.741			116.716			97.598			130.869
																			797.258			95.168			88.619			52.707			151.889			130.975			146.291			61.896			161.078			90.098			28.096
																			47.531			128.018			80.803			56.404			90.943			179.668			677.268			107.315			778.456			79.958			285.293
																			55.77			141.115			53.235			100.344			1275.53			145.657			115.976			129.074			109.427			42.567			856.619
																			88.936			52.601			76.05			64.959			80.909			160.022			134.778			172.38			391.341			66.332			144.495
																			1629.48			84.923			83.127			3048.34			153.79			83.021			376.131			165.514			142.699			99.499			104.569
																			141.96			206.286			421.338			145.551			117.983			149.459			172.486			88.936			75.205			139.847			111.012
																			92.528			144.601			77.318			123.793			1956.7			124.532			127.701			187.801			57.883			137.735			141.854
																			156.114			102.245			107.843			62.636			135.2			100.661			105.519			118.723			74.149			113.758			183.471
																			108.266			127.912			69.396			115.659			109.216			143.227			113.864			140.693			93.901			71.403			82.071
																			78.585			111.857			58.094			207.87			106.153			134.355			538.265			118.723			589.176			145.868			219.806
																			49.855			65.593			124.426			161.501			158.438			174.176			62.953			57.249			82.704			144.178			1418.76
																			1354.64			86.084			115.448			111.857			176.816			62.108			100.449			208.504			154.318			88.408			211.673
																			79.747			55.242			109.85			85.134			124.743			139.531			133.51			966.891			906.474			159.916			106.576
																			102.034			933.514			55.242			110.801			103.513			114.814			206.074			109.639			120.941			97.386			86.084
																			64.748			1806.5			98.231			1690.85			126.433			77.423			193.294			528.442			161.184			116.082			62.319
																			92.105			864.752			55.242			2528.35			249.381			145.974			303.249			86.401			209.138			79.324			106.576
																			101.4			100.978			91.366			193.083			136.784			71.719			697.019			101.4			173.436			56.298			187.379
																			58.516			73.726			88.197			1273.84			2862.97			101.928			273.041			131.081			85.556			234.276			62.424
																			120.307			52.39			183.259			157.698			139.319			90.626			171.113			166.676			185.372			44.574			35.173
																			75.733			57.038			134.038			132.454			91.999			171.324			134.778			119.462			885.771			49.855			110.906
																			99.921			115.765			87.986			72.036			65.91			172.908			209.454			129.074			685.189			147.664			115.659
																			187.907			161.289			143.227			53.446			231.319			132.559			114.075			212.518			760.183			101.083			168.155
																			2449.97			63.269			78.902			68.762			141.96			133.933			534.462			157.487			761.768			90.732			53.869
																			88.302			149.459			101.928			53.763			1869.56			187.907			154.424			58.939			93.689			133.51			151.678
																			82.388			132.982			97.598			58.939						123.264			81.859			181.253			97.914			131.714			133.721
																			137.946			186.956			1359.71			86.718						189.491			62.108			102.139			150.41			124.532			54.291
																			138.369			118.617			1132.83			66.966						189.808			169.634			62.741			147.347			78.057			72.248
																			62.319			113.969			104.252			52.707						190.97			183.893			189.069			140.27			82.176			2089.05
																			54.608			244.839			115.871			35.701						72.142			118.194			113.019			546.821			83.866			72.459
																			196.568			113.969			36.758			113.653						61.051			115.976			135.939			73.938			80.381			89.887
																			237.234			133.933			39.187			53.974						179.879			109.322			209.454			85.451			83.866			1205.92
																			175.443			1813.9			68.868			66.227						251.81			145.974			195.829			91.894			102.245			2858.11
																			209.983			1342.49			85.662			100.238						203.328			69.924			74.466			578.297			90.098			1566.84
																			76.473			138.052			93.373			112.068						164.986			51.756			289.835			149.354			95.802			186.851
																			130.13			113.758			142.383			95.274						70.98			344.338			158.226			83.021			175.549			221.918
																			248.641			65.276			115.448			78.479						103.09			462.532			178.612			261.739			128.863			233.537
																			168.366			119.99			159.177			60.946						132.982			62.213			133.193			103.09			115.554			296.912
																			91.894			188.435			109.744			73.726						76.473			88.619			125.06			243.149			145.446			115.448
																			240.719			252.233			127.806			109.005						132.982			121.152			249.803			412.043			79.219			679.274
																			1617.33			826.516			64.431			105.097						150.516			387.538			206.497			140.164			186.745			122.631
																			106.787			701.984			106.048			68.762						218.221			75.311			125.483			874.153			133.404			1381.68
																			159.071			187.062			84.289			96.119						277.688			84.5			163.719			114.498			91.999			94.429
																			120.201			153.051			58.833			57.46						119.673			110.589			59.573			152.206			253.078			43.94
																			139.108			81.12			94.64			3470.1						56.721			121.68			79.958			588.859			216.743			222.446
																			34.645			122.103			1370.27			1792.03						71.719			110.061			76.473			172.274			170.69			3291.28
																			180.196			155.691			2085.99			954.111						223.925			129.708			246.212			218.433			143.65			215.158
																			77.212			136.362			146.396			122.525						160.022			95.696			218.327			178.718			104.252			185.161
																			202.378			190.336			136.679			171.852						214.736			175.232			177.661			87.774			109.744			129.813
																			55.559			99.499			98.971			77.106						310.538			159.705			274.519			168.155			224.242			99.921
																			128.651			170.162			183.787			128.123						207.342			153.896			117.561			432.64			108.477			188.858
																			126.011			93.373			117.455			152.523						103.724			160.761			96.964			1044.42			2005.71			160.339
																			43.518			450.491			117.772			1699.72						102.984			206.814			131.926			81.543			1728.13			117.772
																			215.053			85.662			86.718			2098.14						169.951			192.132			112.491			645.263			120.307			283.075
																			136.362			70.558			61.685			179.774						149.565			211.778			107.632			188.646			1799.74			203.539
																			1390.55			162.451			884.715			82.282						134.038			151.994			190.231			146.924			197.096			256.774
																			166.993			103.09			140.059			111.118						145.234			105.942			88.725			179.562			256.352			115.976
																			138.157			59.15			135.728			75.311						129.813			148.086			327.966			95.379			78.268			72.248
																			113.758			1109.91			155.058			117.033						89.781			241.036			936.577			106.998			88.197			215.898
																			79.747			794.723			943.337			98.126						106.47			123.264			154.846			84.817			286.138			1433.65
																			144.918			1145.19			91.788			117.877						78.796			81.12			301.665			68.762			133.193			167.838
																			151.149			1176.24			692.161			1172.33						146.291			83.761			104.463			408.135			1155.01			131.503
																			1552.9			1195.46			1225.99			41.933						136.784			139.636			59.784			118.194			1116.77			2084.51
																			91.049			79.219			160.022			2795.15						155.797			192.026			984.319			111.118			164.775
																			102.879			48.165			1649.55			181.569						216.531			134.461			878.483			155.163			1274.26
																			56.087			62.213			123.898			40.243						149.459			103.301			102.984			313.918			1970.22
																			98.865			28.836			1428.16			160.55						200.265			85.345			159.494			171.429			136.679
																			124.215			60.523			743.178			65.487						135.939			56.087			189.069			219.383			120.307
																			142.277			102.351			79.008			115.871						115.237			265.436			157.381			847.535			83.655
																			157.487			73.515			77.318			60.946						160.233			325.748			231.213			899.291			147.453
																			88.091			47.637			117.772			80.592						133.616			550.729			91.577			175.021			128.229
																			51.545			122.103			224.876			203.434						112.702			517.774			175.654			140.798			181.041
																			41.088			203.223			110.906			70.874						186.534			315.924			107.315			95.908			138.897
																			1579.31			210.616			112.702			44.574						141.432			168.261						162.662			135.306
																			125.483			53.024			152.945			52.179						148.403			226.777						226.037			160.867
																			98.759			144.073			2215.27			82.282						157.593			132.982						216.426			100.978
																			41.194			148.931			879.011			28.413						235.016			135.2						109.639			1128.92
																			47.214			157.909			565.728			29.364						119.568			140.587									33.589
																			70.663			146.713			149.882			46.581						139.108			145.763									167.733
																			119.99			101.506			1253.66			77.74						145.34			117.349									73.093
																			221.073			95.062			1841.04			101.506						73.515			306.524									636.602
																			111.223			80.486			75.733			121.574						218.433			124.426									160.022
																			68.762			165.303			224.348			100.978						118.089			141.96									1363.2
																			151.889			256.141			154.424			107.737						196.674			197.096									168.578
																			72.353			54.503			215.792			71.614						192.132			180.091									277.688
																			186.745			235.544			107.526			104.463						126.856			241.776									96.013
																			81.859			87.035			180.091			1161.35						133.827			477.742									1070.83
																			213.574			107.315			100.661			123.053						128.757			343.07									102.034
																			1935.37			115.659			61.051			102.245						202.061			613.787									79.324
																			186.428			1275.11			884.398			69.29						133.51			232.586									78.479
																			722.686			92.211			89.676			83.021						116.293			108.899									93.795
																			173.225			62.108			64.748			81.226						99.71			176.288									221.812
																			90.943			85.768			177.028			1931.56						68.445			364.301									173.225
																			116.927			190.653			149.988			1684.82						153.579			100.133									374.863
																			89.57			93.795			154.529			1253.13						193.083			136.151									167.838
																			99.076			1143.81			1726.97			75.099						190.864			229.101									257.619
																			303.038			1209.19			156.853			148.614						106.364			279.906									255.718
																			520.309			46.581						146.185						100.238			315.185									114.181
																			77.318			56.404						201.004						181.675			109.639									1504.42
																			137.735			136.89						159.494						154.424			236.917									74.466
																			75.839			170.479						1177.3						156.431			159.811									1353.48
																			42.144			889.785						130.13						88.408			49.432									169
																			246.106			84.394						205.018						72.564			111.223									125.166
																			174.281			142.277						121.046						323.846			100.766									122.314
																			180.724			88.408						138.474						127.701			124.109									225.087
																			142.488			223.186						155.797						142.488			181.886									40.56
																			199.314			129.074						177.133						92.422			59.678									228.256
																			141.537			213.574												132.454			48.165									253.289
																			52.179			106.681												201.744												181.041
																			141.96			111.012												197.096												117.561
																			2087.99			154.846												115.343												1180.04
																			149.037			154.107												934.148												49.644
																			151.889			791.554												643.362												53.341
																			131.82			45.313												642.094												1573.81
																			93.584															120.096												301.454
																			43.095															156.853												217.165
																			132.031															155.058												1774.92
																			89.57																											81.859
																			114.498																											1085.83
																			34.011																											759.232
																			93.267																											208.715
																			198.364																											123.793
																			202.483																											160.444
																			231.108																											192.449
																			140.481																											161.395
																			163.719
																			91.26
																			201.004
																			133.827
																			147.03
																			126.961
																			109.533
																			114.709
																			637.024
																			68.868
																			68.656
																			80.803
																			70.874
																			83.127
																			44.363
																			84.817
																			90.415
																			63.798
																			63.586
																			177.556
																			53.869
																			46.053
																			1148.46
																			574.706
																			1191.03
																			882.074
																			648.432
																			117.455
																			51.439
																			69.079
																			123.687
																			128.334
																			140.376
																			101.506
																			73.409
																			118.511
																			90.415
																			66.121
																			44.046
																			38.236
																			41.405
																			69.29
																			80.169
																			93.689
																			76.578
																			72.67
																			75.416
																			52.284
																			23.449
																			71.191
																			1311.23
																			67.706
																			105.625
																			79.536
																			64.959
																			79.324
																			31.371
																			28.519
																			30.42
																			180.513
																			72.67
																			56.404
																			132.559
[truncated: 140 more columns]
