# Supplementary material for: Neural control of growth and size in the axolotl limb regenerate
Source: eLife journal article supplement (doi:10.7554/elife.68584), 2021-11-15
Supplement: supp [file elife_poa_e68584_Figure_3_source_data_1.xlsx]

## Sheet: Sheet1
Regeneration Stage:	Unamputated Limb						Early Tiny Limb						Late Tiny Limb						Fully Regenerated Limb								Nerve Area (in pixels)							Nerve Area (in mm2 - Figure 3-figure supplement 1)
Biological Repicate	1	2	3	4	5		1	2	3	4	5		1	2	3	4	5		1	2	3	4	5					Un-amputated Limb	Early Tiny Limb	Late Tiny Limb	Fully Regenerated Limb				Un-amputated Limb	Early Tiny Limb	Late Tiny Limb	Fully Regenerated Limb
Innervation/Anti-body Positive Area (pixels)	703.674	134.461	372.011	333.353	1233.7		1557.55	1.69	212.412	40.771	960.343		887.884	265.541	491.79	187.907	79.958		562.77	249.381	434.013	200.793	2594.57				Bio Reps	115006	61796.1	151771	154869			Bio Reps	74751.9	40166.5	98648.8	100662
	274.097	33.272	23.343	108.688	26.618		450.808	3.697	161.923	79.958	32.849		598.366	76.789	61.368	296.067	9.506		55.77	92.528	260.788	97.175	93.795					111387	64751.3	117762	137863				72399.8	42087.3	76543.2	89609
	34.117	7.816	40.032	59.361	1474.95		125.483	15.738	1.268	29.258	4.647		84.078	35.384	44.151	234.065	154.635		84.606	134.038	251.599	12.358	10.246					84899.1	79233.7	117554	100069				55183	51500.6	76408.2	65043.5
	38.764	4.331	375.074	119.673	82.81		112.702	8.133	220.968	27.251	149.882		3.697	17.428	187.907	128.123	99.71		285.716	20.28	149.565	24.399	152.839					111501	82327.3	111019	97168.9				72474.2	53511.4	72160.7	63158.2
	16.9	25.878	113.124	111.646	100.027		4946.1	52.707	72.987	29.258	25.561		27.463	14.893	5.915	12.147	72.248		6.76	170.584	176.816	2364.84	138.686					108263	66974.2	126668	93986.5				70369.3	43532.1	82332.3	61089.7
	47.848	20.597	3.591	249.381	12.569		1399.95	492.213	835.494	37.497	83.866		2.007	48.165	137.418	24.822	19.224		43.518	0.739	52.39	99.816	288.567
	22.921	12.253	49.327	288.779	116.082		608.4	849.648	4.753	75.099	176.183		28.519	60.101	152.206	56.615	23.977		202.8	60.523	17.534	28.73	57.566				AVG	106211	71016.5	124955	116791			AVG	69035.6	46159.6	81218.6	75912.5
	13.309	309.481	28.836	60.206	84.183		1012.42	14.682	35.384	102.139	90.204		251.599	26.301	445.632	11.302	49.749		174.598	72.776	56.193	30.631	65.171				SEM	5433.87	4099.17	7151.1	12406.9			SEM	3531.93	2664.4	4648.1	8064.31
	106.048	2.746	49.961	29.681	304.411		49.01	42.144	110.378	168.049	67.072		48.059	23.871	39.821	21.019	23.766		32.004	8.556	628.997	12.464	75.839				ANOVA p-value	0.001						ANOVA p-value		0.001
	47.003	38.764	35.068	14.048	107.209		252.021	2.429	195.829	300.609	163.508		7.288	76.789	18.273	19.858	82.81		393.77	15.633	25.667	510.697	236.178				Tukey HSD Results:							Tukey HSD Results:
	53.341	50.594	91.154	3.591	24.505		16.266	6.866	209.771	109.533	778.245		153.79	10.562	308.636	374.969	60.629		567.312	47.743	93.267	138.686	26.512				Comparison:	P-value:	Indication in figure:					Comparison:	P-value:	Indication in figure:
	128.334	78.374	18.379	103.407	4.119		509.324	41.405	28.202	465.173	130.869		95.379	16.794	356.273	380.144	9.929		370.004	42.356	139.108	228.044	8.556				Unamp-ETL	0.0291126	*					Unamp-ETL	0.0291126	*
	63.164	12.147	8.239	93.056	12.886		1138.11	42.356	6.971	3.486	286.349		16.266	35.384	218.961	613.364	93.373		55.981	26.618	8.873	101.506	75.839				Unamp-LTL	0.370284	N.S.					Unamp-LTL	0.370284	N.S.
	12.147	2.852	39.715	92.739	432.323		102.456	9.612	11.196	23.132	191.709		18.696	6.443	44.679	335.571	14.999		2.852	14.154	28.413	70.98	14.048				Unamp-Regen	0.761947	N.S.					Unamp-Regen	0.761947	N.S.
	80.064	16.9	41.722	38.553	20.28		135.411	10.351	12.041	6.549	18.696		71.086	107.104	78.796	389.334	39.609		352.259	483.868	102.351	43.623	154.635				ETL-LTL	0.0010053	**					ETL-LTL	0.0010053	**
	24.611	15.421	20.597	201.744	15.844		105.414	1.796	55.348	91.894	25.35		101.4	3.908	193.505	230.474	16.9		8.873	1.584	8.661	17.534	42.039				ETL-Regen	0.0043308	**					ETL-Regen	0.0043308	**
	89.464	0.423	6.654	83.655	23.871		2.852	0.951	91.577	83.021	9.506		45.102	28.73	9.823	169.317	115.554		6.232	344.126	69.184	10.562	875.103				LTL-Regen	0.878122	N.S.					LTL-Regen	0.878122	N.S.
	4.753	0.845	2.746	74.254	7.394		149.671	0.951	2244.43	143.544	160.127		528.231	6.549	26.301	582.839	25.456		8.661	19.646	120.307	143.65	244.311
	22.181	72.459	9.929	3.063	19.752		22.287	59.044	73.726	12.147	134.249		33.061	63.269	3.38	7.816	469.292		7.605	170.056	104.674	62.108	83.761				Tissue Area (in pixels)
	8.45	94.64	62.319	50.278	25.033		35.596	4.859	58.728	297.017	17.745		4.225	331.451	7.499	34.117	40.032		27.991	97.703	16.266	216.954	8.873					Un-amputated Limb	Early Tiny Limb	Late Tiny Limb	Fully Regenerated Limb
	10.668	36.229	22.921	52.812	8.133		35.384	11.408	105.625	1289.58	611.886		4.436	137.629	7.394	94.112	3.591		57.354	29.786	310.96	4.436	72.353				Bio Reps	1.38076e+07	4.15465e+06	1.19106e+07	1.58452e+07
	125.483	8.133	57.777	38.131	15.316		19.752	1.162	65.171	270.928	291.736		4.119	116.082	3.486	47.743	8.239		148.509	53.763	71.719	40.56	26.195					1.4073e+07	4.01403e+06	1.02516e+07	1.4276e+07
	26.301	16.583	70.241	10.879	15.738		80.275	5.176	48.693	7.288	26.934		28.308	41.828	37.391	720.151	246.74		25.033	6.232	77.74	50.489	16.9					1.21313e+07	4.28456e+06	1.08178e+07	1.28839e+07
	203.645	12.569	2.113	0.951	6.126		41.616	1.479	32.216	1.796	58.094		60.629	21.019	24.611	2.852	27.04		10.351	50.7	32.11	29.786	385.743					1.18778e+07	4.16212e+06	1.04667e+07	1.33054e+07
	36.124	23.343	20.597	837.184	225.192		4.119	3.274	67.072	30.103	138.686		7.394	9.295	39.293	13.414	61.474		393.981	193.294	20.174	2.218	32.744					1.17436e+07	4.02793e+06	1.16626e+07	1.01814e+07
	10.14	0.951	35.279	79.958	3.591		3.486	2.852	20.386	22.921	107.949		213.679	5.493	41.405	1.796	9.401		5.704	3778.95	25.033	6.443	951.048
	3.486	195.301	247.479	224.242	9.929		9.084	2.535	5.493	68.023	32.638		11.091	3.063	50.172	149.143	1.584		5.493	50.172	15.738	43.94	59.995				AVG	1.27267e+07	4.12866e+06	1.10219e+07	1.32984e+07
	133.721	3.169	28.941	760.606	4.753		67.811	4.119	3.697	25.878	1659.58		1.69	7.922	57.777	28.941	18.59		3.274	30.103	130.764	2.324	267.654				SEM	501122	49691.9	327377	930849
	126.328	2.113	233.748	28.941	0.317		393.031	0.211	12.886	2.324	703.462		16.794	11.513	29.892	40.138	14.682		822.819	26.618	322.896	16.689	196.04
	70.135	70.663	15.421	154.529	76.261		16.161	31.054	3.169	185.266	1033.43		46.792	43.518	670.93	534.991	16.372		104.146	335.782	64.748	33.378	141.009				Relative Innervation (Figure 3)
	47.743	1297.71	7.394	39.081	2.218		1.69	9.718	56.298	4.436	27.251		6.866	1.373	73.515	84.923	58.516		342.647	19.963	77.951	1.901	7.394					Un-amputated Limb	Early Tiny Limb	Late Tiny Limb	Fully Regenerated Limb
	7.605	8.027	29.681	96.541	17.217		13.731	37.814	33.061	4.331	25.456		3.063	126.644	112.491	6.549	376.025		202.589	59.467	5.281	3.38	30.737				Bio Reps	0.83292	1.4874	1.27425	0.977385
	17.428	1.479	17.111	23.026	655.298		6.866	22.287	114.498	4.542	22.393		78.902	68.128	37.602	4.542	106.998		1445.27	40.032	28.202	9.823	2.113					0.791494	1.61312	1.14872	0.965699
	1037.45	4.436	38.447	26.618	119.99		3.486	0.951	31.265	3.908	2.218		41.088	20.069	213.257	102.139	116.716		14.576	129.708	2.429	25.033	170.69					0.699836	1.84928	1.08667	0.776704
	35.173	6.76	67.706	24.822	49.432		2.324	19.752	496.015	1090.47	5.281		42.567	274.625	15.949	9.189	15.949		22.498	81.437	8.767	284.343	157.276					0.938735	1.97801	1.06069	0.730296
	164.141	3.908	58.094	55.348	49.644		2.218	24.611	138.791	2364.63	329.233		39.398	108.583	36.652	383.736	1.796		3643.75	22.921	24.611	180.302	16.055					0.921893	1.66274	1.08611	0.92312
	42.778	2.113	26.301	255.507	3.697		21.97	34.856	72.353	106.048	8.344		1050.34	8.661	12.464	397.15	0.951		21.019	10.985	169	91.366	14.259
	41.933	86.929	103.513	4.014	37.708		7.711	10.879	75.522	29.681	32.849		23.66	2.324	44.046	17.745	7.605		87.246	71.825	23.554	5.07	78.057				AVG	0.836975	1.71811	1.13129	0.874641
	5.809	63.903	178.718	19.329	463.06		4.964	31.054	74.782	16.478	11.302		17.006	3.063	63.058	76.578	66.227		254.239	117.455	5.07	98.548	22.604				SEM	0.043851	0.0871988	0.0385743	0.0508062
	91.894	19.646	2.007	27.991	130.341		4.753	1.268	2.113	92.211	3.274		59.15	19.435	114.709	6.021	1.162		151.678	135.728	29.364	175.971	471.299				ANOVA p-value	2.8751e-08
	9.295	21.864	34.962	21.547	0.634		35.173	0.951	1.584	11.196	190.759		8.556	35.596	205.652	42.144	2.746		21.864	44.996	15.421	39.293	34.539				Tukey HSD Results:
	8.45	8.978	11.196	342.647	25.984		20.703	35.49	2.535	6.971	397.784		32.216	267.548	34.962	22.498	0.845		2.113	69.396	612.414	41.405	58.411				Comparison:	P-value:	Indication in figure:
	3.803	8.767	12.464	10.457	9.929		52.179	0.423	23.449	42.567	627.624		189.069	0.951	6.126	96.541	17.323		4.859	496.543	117.561	26.406	37.18				Unamp-ETL	0.0010053	**
	10.457	3.803	22.709	3.803	6.971		5.176	0.528	6.021	13.731	84.606		44.046	1.479	12.041	73.304	159.071		19.224	2.535	142.066	58.094	11.513				Unamp-LTL	0.0122952	*
	20.28	14.787	503.937	2.218	178.718		18.484	2.324	1.162	114.814	47.109		24.188	6.76	36.863	4.014	355.851		45.102	54.608	7.711	37.814	73.093				Unamp-Regen	0.899995	N.S.
	63.481	3.063	7.077	8.45	0.528		40.983	116.927	12.147	54.397	84.817		33.483	0.634	269.978	25.139	45.313		298.813	226.037	210.616	45.736	37.18				ETL-LTL	0.0010053	**
	237.973	9.084	12.253	9.295	24.822		111.857	9.401	360.709	93.267	23.449		290.469	1.268	380.673	50.911	20.069		15.104	260.049	116.293	48.482	10.879				ETL-Regen	0.0010053	**
	160.022	9.084	4.753	54.714	186.851		24.716	23.132	76.684	20.491	10.457		65.699	75.733	169.211	67.283	5.07		207.659	267.759	113.864	38.236	6.443				LTL-Regen	0.0306632	*
	14.259	12.886	23.026	413.522	157.804		35.384	8.45	46.264	3.063	27.568		48.165	6.338	13.203	65.804	16.689		12.041	93.478	101.717	30.42	0.634
	1.69	0.528	106.787	13.52	143.861		46.369	2.324	49.644	5.809	2.113		28.836	3.591	82.493	326.064	26.512		102.245	32.321	210.828	43.306	8.767
	38.131	8.978	734.939	8.556	57.038		1.162	27.251	9.612	5.387	4.014		9.612	12.569	2.535	397.467	2.113		13.309	0.739	14.787	104.886	22.604
	24.822	50.383	13.837	10.879	228.889		23.871	335.465	4.225	14.999	110.167		22.287	55.453	2.852	111.751	169.739		4.647	1398.37	17.956	8.556	133.088
	27.357	57.777	12.358	11.513	79.536		10.457	13.309	14.048	133.933	0.634		4.542	10.034	1.268	146.924	10.034		60.418	30.103	257.514	33.166	6.549
	9.929	22.181	167.416	37.919	18.907		2.429	21.759	8.344	112.491	30.209		49.01	6.232	88.619	6.021	525.168		23.026	36.652	145.446	16.583	24.399
	21.547	12.253	86.401	2.324	2.429		13.098	10.034	1877.27	4.225	183.048		11.091	23.766	43.412	14.365	14.682		11.513	66.332	1.056	179.351	3.486
	41.828	12.358	0.423	24.294	253.817		62.424	0.211	34.751	4.119	97.069		2.429	2.007	144.918	123.053	23.449		10.14	4.331	94.218	182.731	503.937
	13.837	72.881	0.951	14.999	16.372		230.157	0.739	16.583	102.456	15.316		0.739	31.899	25.033	612.836	1.479		41.088	5.176	101.294	14.154	157.804
	27.357	18.801	38.342	15.844	13.309		9.401	31.582	14.893	71.508	6.866		16.9	4.014	39.821	1347.14	19.541		93.267	66.438	72.881	733.249	59.15
	322.579	2.113	61.157	38.131	2.007		103.196	399.368	67.811	2.218	9.718		6.232	331.346	366.096	87.141	42.989		27.251	228.15	52.812	387.327	7.183
	52.179	47.743	9.084	2.324	26.934		0.739	5.809	6.232	1.268	6.338		6.126	12.781	17.323	6.866	3.697		527.069	45.313	10.562	442.252	17.745
	7.711	1.162	11.196	118.828	42.673		0.845	8.873	417.008	1.479	77.106		5.387	47.637	83.233	7.394	26.723		85.451	115.448	18.168	93.056	72.776
	17.745	1.268	1.69	7.499	46.898		31.793	45.63	535.73	0.528	4.647		38.025	33.166	19.752	182.203	188.013		126.116	7.288	22.921	67.917	17.639
	6.971	425.035	3.908	42.461	19.012		160.867	49.221	744.445	9.295	63.269		92.422	246.423	21.019	14.787	80.803		215.053	98.759	11.724	985.164	38.342
	9.612	11.513	7.077	297.334	2.324		1.056	210.722	168.789	27.146	127.067		0.845	25.878	8.027	644.841	162.451		19.012	19.224	13.943	10.774	15.316
	110.695	27.357	2.429	91.894	19.012		1.796	39.926	859.365	41.933	50.172		22.921	19.012	131.186	18.379	57.883		138.052	3.803	13.731	117.455	25.561
	10.774	2.218	64.326	14.365	93.901		6.338	87.035	111.118	1.056	63.903		89.253	416.479	24.399	34.539	13.731		51.228	4.859	159.811	413.839	3.063
	14.893	304.834	25.984	20.808	65.91		2.958	9.823	25.773	27.885	60.629		261.316	7.711	289.835	5.281	4.225		361.343	95.485	69.501	259.415	5.07
	15.633	518.513	6.021	31.688	5.281		2.641	93.689	23.132	174.915	19.118		2231.43	3.697	73.938	49.116	19.963		42.144	4.331	10.14	1119.94	6.232
	30.209	118.723	0.951	12.147	5.915		7.499	284.343	4.859	117.455	65.487		18.379	2.641	24.188	335.571	2.324		76.684	40.032	1.056	16.9	19.858
	13.731	121.152	6.654	15.421	7.394		25.244	346.873	13.52	14.682	74.36		4342.98	3.591	27.991	8.556	53.446		51.017	2.429	85.134	4.964	46.475
	119.356	305.468	4.331	32.004	19.118		21.231	99.076	2.958	18.801	43.729		48.059	0.951	165.409	14.365	265.224		14.682	656.776	47.531	19.118	38.131
	492.107	1.268	4.014	44.151	18.801		49.538	131.398	953.688	5.493	2.958		70.874	32.638	8.133	609.139	26.089		26.195	27.674	49.432	25.033	6.549
	33.694	24.822	2.429	3.803	39.715		1444.42	29.892	72.142	12.253	77.001		34.011	3.38	4.119	75.311	71.508		47.32	181.041	0.423	55.136	13.414
	59.044	7.922	24.611	25.244	18.062		394.193	1.162	121.786	2.958	20.914		67.494	52.601	7.288	58.094	2.113		153.79	12.253	130.764	23.132	24.083
	7.394	127.489	7.394	6.866	11.936		7.711	2.218	109.956	1.901	21.97		143.861	23.132	25.244	21.442	3.38		2.535	109.956	140.376	39.926	89.993
	11.936	10.562	12.147	334.937	32.533		9.295	26.195	62.002	69.396	134.883		12.675	1.69	34.751	13.626	5.809		467.602	107.104	326.064	9.612	125.694
	12.253	1.901	41.828	82.071	55.136		4.014	282.653	17.745	110.061	46.053		1.479	565.516	2.535	136.573	132.454		116.188	187.907	316.453	6.232	67.072
	14.154	76.05	21.231	16.161	18.59		38.236	36.863	24.611	62.108	41.722		5.809	5.915	5.281	157.276	1.162		27.991	223.608	26.829	2.113	344.866
	10.246	7.499	171.535	6.232	7.288		25.139	0.317	1.162	91.471	30.209		120.307	10.034	18.273	40.454	526.858		12.781	9.506	179.351	376.87	46.264
	26.829	0.845	5.598	30.42	0.423		32.004	26.723	12.464	214.524	16.372		145.657	19.963	523.689	28.202	164.036		35.596	19.435	5.809	6.021	4.647
	4.331	6.971	13.731	22.287	16.478		51.334	0.423	140.376	171.852	6.232		180.196	9.823	329.656	65.065	4.647		38.342	35.913	10.351	38.976	3.803
	22.815	1.162	27.04	6.866	19.329		18.062	49.432	1.479	9.189	3.591		191.921	49.221	36.335	164.564	18.696		24.399	8.767	43.412	21.97	3.486
	99.499	8.556	26.618	361.554	1.901		1.056	1.796	44.151	103.513	3.38		58.094	49.116	3.591	273.674	32.11		84.5	4.014	263.957	33.8	82.916
	0.423	6.654	8.661	211.778	135.728		4.225	0.634	40.771	214.102	1.373		15.527	14.893	17.639	32.427	54.608		11.83	46.581	4.119	1.268	1.056
	6.443	51.334	3.486	207.131	11.302		159.705	2.007	104.991	130.764	2.429		2.429	94.957	116.716	56.404	6.021		36.969	114.603	57.249	22.498	12.041
	28.202	8.344	28.624	153.156	17.639		1.162	0.739	3.169	33.166	64.642		17.745	16.794	2.113	36.969	143.756		8.027	64.114	52.496	86.612	2.113
	13.52	7.077	5.387	6.443	56.087		49.855	72.776	9.612	13.203	16.266		220.968	35.596	10.457	11.936	12.675		242.409	0.739	43.412	32.216	3.38
	1.479	40.138	19.329	95.802	13.309		0.951	0.317	34.751	8.556	211.778		152.1	57.354	9.823	2.113	21.442		17.428	1091.63	3.169	17.006	24.928
	170.796	2.324	65.804	296.701	24.611		3.803	117.033	169.317	61.896	9.189		4.542	14.893	68.868	63.903	47.214		32.638	45.63	13.837	39.609	464.75
	19.118	217.165	13.943	691.316	353.104		7.183	12.569	150.304	39.398	5.387		160.233	6.866	167.521	14.682	21.759		35.173	3.908	2.218	14.787	194.35
	24.399	4.647	13.943	55.559	14.048		16.055	33.378	34.962	19.963	265.964		121.574	6.338	5.281	98.865	20.386		21.231	5.598	4.014	16.689	591.289
	7.394	64.009	1.796	29.575	18.59		0.528	1030.16	24.188	12.041	9.506		27.885	73.938	318.882	227.411	106.576		523.372	2.641	14.365	1.584	2.324
	1.901	51.968	3.38	19.435	325.959		1177.82	0.634	2.429	48.482	10.774		5.281	12.041	66.016	24.294	31.371		36.018	1.69	10.034	35.913	22.498
	4.647	2.113	244.733	34.645	3.803		32.638	10.457	13.731	469.609	154.846		28.519	1.268	598.154	71.719	8.873		9.189	8.556	28.413	24.399	15.633
	95.908	36.863	4.753	125.483	6.443		0.951	1.584	180.091	252.549	19.963		10.985	2.852	105.942	37.708	19.118		2.113	23.449	35.173	28.836	117.983
	22.709	95.591	1.901	32.533	10.985		1.056	7.605	278.85	1307.64	8.661		2.429	59.256	500.557	12.041	239.874		1.268	4.964	14.365	6.443	3.38
	37.708	16.9	0.845	14.365	5.281		2.535	0.951	12.147	28.836	114.392		2.218	4.436	218.327	7.922	52.073		3.38	2.218	140.059	18.59	5.915
	32.004	16.055	58.411	8.344	1080.02		356.907	0.739	12.569	97.914	200.476		3.591	1.796	67.706	15.104	40.349		55.77	27.885	332.296	9.929	3.169
	1.584	10.774	3.274	5.493	55.242		14.576	3.486	11.936	25.033	47.637		35.807	241.142	44.785	19.329	4.014		35.596	20.174	96.858	40.243	66.861
	5.387	18.379	1.901	2.958	4.225		56.509	764.619	27.779	13.731	3.063		35.596	4.859	17.851	6.126	2.324		18.379	2.324	89.042	80.803	18.696
	0.211	54.819	8.239	155.269	93.478		367.258	0.951	67.706	55.031	4.859		20.174	49.855	12120	101.294	12.781		17.534	51.756	10.457	4.225	85.345
	4.647	9.612	137.524	11.83	12.675		6.971	308.848	437.076	2.007	6.549		3.908	23.977	586.43	43.623	4.542		70.346	2.958	24.822	17.956	5.07
	155.797	7.816	10.562	4.542	19.224		7.077	24.611	67.6	253.711	1922.27		8.45	76.895	47.426	63.798	5.704		255.401	5.915	3.486	4.753	152.945
	481.228	5.176	45.841	134.778	14.893		4.542	9.401	17.534	14.048	1.69		3.169	34.539	51.968	0.423	20.491		18.379	5.809	12.569	23.977	22.498
	38.659	0.845	2.958	2.007	1.162		90.626	3.169	68.339	4.647	3.697		1.796	79.641	142.805	1480.76	86.824		75.205	8.978	1.584	16.055	11.302
	17.745	5.387	25.561	26.195	284.554		24.928	1.268	454.399	58.411	27.779		3.169	208.292	2.429	153.684	46.898		136.784	16.478	131.714	6.654	10.034
	23.238	5.809	33.694	246.106	150.304		287.511	2.958	86.296	1.796	262.056		4.647	280.223	7.288	418.486	224.664		5.387	2.852	26.406	5.704	37.814
	251.916	0.317	27.251	1.056	17.111		27.674	0.423	1087.73	144.389	1441.78		47.531	9.718	57.46	97.703	10.879		128.863	9.823	3.697	2.324	5.07
	185.266	14.471	907.213	58.622	431.373		35.173	0.634	24.716	33.694	320.466		16.583	20.491	31.054	31.265	16.372		120.307	9.612	35.279	248.324	3.803
	15.421	26.512	153.684	37.286	71.086		8.027	0.951	7.077	431.056	1.268		21.442	68.023	541.645	236.178	48.904		105.836	127.278	3.063	528.231	14.999
	44.996	478.904	7.288	263.64	6.76		12.886	2.218	1942.13	4.647	2.852		296.384	1.162	383.947	72.459	100.027		12.041	17.639	131.714	70.663	73.304
	25.456	55.031	6.76	27.568	22.287		104.991	13.626	298.391	68.551	4.859		32.955	2.746	40.032	25.139	19.118		121.68	27.568	5.387	5.281	47.954
	38.764	1.479	171.429	9.718	16.794		36.652	123.37	16.794	12.358	583.367		12.358	130.447	138.791	12.358	36.758		23.766	34.117	1.268	60.84	17.323
	31.582	169.528	4.753	17.006	20.703		1.162	7.605	14.259	391.974	3.803		4.331	32.321	6.866	52.284	160.972		18.168	190.653	1.056	21.97	8.661
	658.149	324.48	7.605	3.169	1.796		51.545	267.126	47.109	80.381	14.787		2.641	52.918	3.38	32.638	1.584		11.619	8.661	116.504	135.939	80.592
	520.942	21.125	24.083	10.351	8.978		15.21	20.174	31.265	167.521	20.597		69.396	26.829	54.714	8.344	47.637		717.194	11.408	13.943	171.535	11.936
	81.014	3.063	71.614	190.231	4.542		0.951	10.246	149.671	172.38	7.288		467.708	32.744	150.621	1.162	30.209		5.915	474.256	3.169	176.711	6.126
	0.845	23.449	52.496	17.639	85.345		106.681	3.169	15.633	18.907	2643.69		2.324	116.927	14.471	18.484	31.054		53.024	8.133	252.655	174.809	28.941
	5.598	41.194	10.774	4.436	559.707		14.048	5.704	6.443	0.951	21.97		4.225	71.191	8.873	1.268	44.996		298.391	20.174	1.69	172.169	2.113
	11.724	2.535	18.379	11.408	113.547		45.841	26.723	7.711	78.691	7.922		26.089	34.856	14.576	15.844	679.486		360.287	18.907	0.634	3.38	112.913
	16.161	0.739	23.449	47.426	6.76		50.806	19.435	4.542	35.384	10.562		5.281	55.031	20.597	3.486	198.153		306.946	12.675	6.549	2.746	39.293
	108.16	3.274	50.172	85.662	35.701		53.657	3.063	15.844	2.746	3.063		101.717	413.944	9.612	9.823	28.413		1061.11	15.844	86.718	67.706	12.147
	312.333	4.542	25.561	4.014	2.429		15.316	17.851	4.647	12.041	11.619		2.113	57.143	8.978	43.518	37.497		355.851	1.901	50.806	23.66	302.827
	2.007	5.07	52.601	32.638	4.225		16.583	49.01	14.259	76.367	0.634		14.999	278.744	462.426	29.047	10.246		7.816	213.891	5.176	7.077	575.762
	700.928	20.491	142.911	24.928	6.549		21.864	0.528	2.641	1.479	7.288		1.479	223.608	155.058	11.513	54.503		314.446	2.429	94.957	434.964	96.436
	2.852	29.047	209.983	49.116	12.041		3.274	1.373	216.32	20.914	10.246		70.029	8.239	1.69	17.217	15.421		195.089	123.793	285.927	9.929	57.988
	12.781	14.576	23.871	10.879	1.268		2.324	5.598	132.876	54.08	13.837		13.203	13.626	12.992	318.354	64.22		124.109	21.547	75.733	50.594	21.864
	8.556	4.119	51.439	78.268	1.373		17.217	10.668	2.641	4.647	2.429		123.159	332.507	160.55	22.815	13.626		63.375	48.376	32.216	6.338	153.368
	14.365	52.496	80.169	84.183	47.426		20.28	4.436	51.123	3.591	30.948		14.893	251.388	124.004	19.752	1.268		71.191	63.481	171.746	44.679	72.459
	4.859	189.386	18.273	4.542	25.456		7.605	0.211	429.154	2.324	5.493		3.591	325.114	14.259	55.664	9.823		7.816	4.753	71.297	11.936	4.859
	50.066	273.886	4.542	8.873	4.436		18.062	379.194	358.386	7.183	2.535		2.218	116.399	32.321	61.474	3.908		4.542	0.423	49.855	4.014	49.644
	18.168	12.147	11.196	4.542	5.493		132.559	243.994	86.084	3.063	23.449		33.166	35.49	5.07	10.351	9.929		4.753	0.951	90.838	6.338	13.098
	44.679	12.675	33.061	1.69	12.781		2.113	1.373	7.605	3.697	331.24		19.329	142.594	98.443	914.924	2.641		9.401	29.364	19.752	36.441	13.52
	27.357	9.506	11.302	15.421	117.983		14.471	2.429	4.964	4.647	1368.48		348.774	12.569	15.527	1808.72	2.324		1.901	17.534	418.064	4.225	33.8
	3.38	2.218	7704.82	24.611	29.364		11.408	1.162	4.119	4.225	260.154		12.992	44.468	793.349	514.183	66.966		23.977	33.906	2.852	2.641	3.38
	40.771	41.511	6.866	3.697	12.041		13.203	103.09	28.308	18.379	11.408		2.535	14.471	593.613	101.4	2.535		69.29	2.641	0.739	4.225	1.056
	20.174	32.216	54.608	36.335	47.848		4.436	169.634	11.302	1.162	155.586		52.073	1.373	909.643	12.569	34.856		1120.15	69.396	79.747	17.111	20.808
	52.707	42.461	23.977	41.828	30.737		1.373	99.499	18.273	1.479	130.13		211.567	4.436	210.616	768.211	62.108		2087.26	3.697	163.085	10.034	9.401
	364.301	2.113	2.641	43.729	48.799		20.174	2.218	90.309	3.803	1169.8		2.641	11.196	66.438	25.984	64.959		400.53	34.539	176.816	7.922	93.584
	8.45	45.208	2.113	36.124	53.763		8.133	0.951	3.908	152.945	10.668		4.859	2.535	17.006	10.351	2.429		121.574	14.787	51.968	79.008	152.311
	75.416	60.946	102.245	22.393	6.021		5.176	1.056	26.406	7.288	43.412		26.512	41.511	105.836	0.845	2.535		51.756	22.815	2.641	28.096	6.126
	6.443	11.196	10.562	48.376	81.014		1.056	76.895	12.253	21.759	6.443		19.118	46.581	89.148	58.622	23.766		12.675	44.363	2.641	1066.71	9.929
	38.236	0.317	15.421	53.552	37.497		2.324	24.611	7.077	307.58	85.239		3.063	3.486	338.423	63.692	35.49		48.271	132.454	11.936	17.956	0.634
	104.886	8.978	4.542	80.909	4.964		1.479	12.886	48.587	114.603	8.873		11.302	2.641	110.061	63.586	391.129		92.211	60.523	5.598	148.826	53.235
	7893.67	4.014	12.147	5379.9	33.166		0.317	28.836	20.808	862.851	95.802		4.542	5.281	58.833	322.896	38.342		1.162	7.499	48.693	81.648	66.227
	191.393	259.309	18.801	4213.7	9.084		1.69	1.056	0.845	86.718	84.394		3.697	224.136	445.738	158.332	0.211		6.338	39.398	14.999	235.966	63.481
	97.598	138.052	523.689	5977.42	52.812		7.288	8.133	12.041	55.348	18.484		7.394	114.92	181.886	1527.13	2.218		7.394	9.506	1.056	38.553	89.359
	22.815	126.75	17.323	9.823	68.234		6.232	1010.73	3.486	335.254	5.387		4.753	10.14	28.836	124.109	2.852		203.856	2.429	168.366	128.018	4.225
	30.42	9.295	3.274	2.958	276.632		15.316	67.178	198.258	7.711	2.007		4.014	7.183	564.988	79.008	33.483		80.486	7.922	176.183	14.682	26.301
	21.547	62.636	39.821	32.955	131.186		6.126	13.309	43.095	394.193	50.172		45.841	1.69	453.765	4.753	3.274		37.497	3.274	114.92	552.524	14.048
	33.483	2.641	5.809	2.113	31.159		24.294	15.527	98.337	31.054	17.956		19.118	3.169	109.956	66.649	2.958		8.661	8.027	109.956	229.734	23.132
	29.469	2.535	3.908	13.626	130.447		2.641	26.089	122.842	784.688	0.845		99.182	1.162	567.629	57.671	28.413		4.119	29.469	20.174	252.549	59.784
	33.694	2.641	11.302	3.697	25.878		126.644	22.921	43.834	88.831	1451.39		407.924	362.399	357.012	6.654	138.263		3.38	13.203	53.763	15.527	4.014
	68.762	3.908	25.878	6.443	8.556		1007.45	5.493	8.239	183.154	42.25		297.017	38.87	13.837	0.739	2.007		2.324	5.387	10.351	157.381	45.419
	148.403	3.908	109.85	22.921	1.796		107.949	2.746	25.35	384.792	109.85		551.891	11.196	1250.07	0.951	7.816		0.634	3.591	3.697	68.234	254.979
	6.971	2.324	184.21	5.809	103.407		7.183	0.423	29.786	159.388	1.268		8.556	4.225	955.484	79.113	21.653		9.189	5.493	6.338	210.828	25.878
	40.983	1.796	51.862	24.188	157.276		45.524	1392.35	363.878	358.386	105.625		29.364	2.641	7.922	1.373	9.823		4.647	190.125	63.586	57.671	4.542
	24.188	2.113	12.041	195.195	40.56		350.041	169.317	108.583	2141.97	27.146		18.484	9.823	48.482	60.946	45.102		8.767	3.591	2.746	328.388	194.984
	99.816	38.342	370.321	173.753	58.199		389.123	247.796	17.323	424.084	5.598		21.97	2.852	39.504	72.459	832.219		1122.9	3.486	346.45	17.217	69.713
	14.259	22.498	158.015	7.394	25.033		38.553	1315.24	1161.14	56.826	4.859		171.324	4.436	11.619	12.253	16.583		164.775	22.287	22.287	10.457	486.192
	232.903	16.055	65.382	52.601	12.041		4.542	8.556	306.735	79.113	0.845		92.739	3.274	7.394	1.268	6.021		80.592	6.866	2.958	10.562	34.539
	10.457	51.545	10.246	22.076	6.654		11.513	12.147	166.571	194.984	1.373		128.229	78.902	5.07	7.711	9.929		172.908	10.246	1.268	8.767	6.338
	127.067	9.401	17.111	31.054	118.934		44.363	2.958	320.044	11.302	28.941		57.988	5.387	33.378	40.243	6.971		2.641	29.469	50.7	224.031	4.859
	56.404	1.162	3.169	13.098	27.568		6.76	8.556	34.539	8.556	1.69		7.394	194.561	55.031	8.978	14.893		8.873	137.841	1.056	131.186	3.591
	79.008	200.899	3.063	950.836	52.496		2754.49	1.796	14.048	302.51	5.281		6.971	61.685	17.534	7.183	1.584		1.796	16.689	15.104	191.815	17.534
	23.238	18.907	1.69	17.956	3.063		49.961	24.505	6.021	1960.4	1.901		12.358	22.287	19.646	12.569	14.576		192.449	1.69	12.464	12.147	39.293
	90.098	182.52	3.274	2.007	1234.33		1072.83	560.974	13.203	127.278	3.38		3.697	15.421	920.522	187.907	29.047		7.288	11.408	45.419	25.878	617.273
	8241.39	6.232	8.767	64.431	3.38		56.087	45.102	390.918	10.351	3.803		4.542	199.314	123.687	116.504	114.498		24.611	8.45	204.067	139.002	160.55
	32.955	2.324	27.779	13.731	7.605		6.232	124.532	153.79	21.231	767.366		29.469	2.958	119.356	57.143	55.136		37.919	526.541	252.338	12.041	16.055
	169.634	11.936	51.228	159.177	7.394		26.934	96.541	20.174	7.711	19.224		2.958	101.294	7.394	15.527	132.454		64.22	48.693	252.655	9.823	4.436
	518.091	1.584	197.308	202.166	5.493		14.154	3037.88	7.922	17.217	50.383		124.638	34.223	1301.93	127.489	5.387		107.949	17.534	91.154	524.639	11.091
	50.594	19.435	14.787	243.783	10.246		2.218	1357.91	467.496	14.682	25.033		19.858	3.38	787.962	15.633	3.063		64.642	88.514	0.951	2.746	77.846
	295.539	15.738	42.989	11.408	2.535		1679.97	12.992	138.157	8.133	532.139		58.094	8.027	35.596	7.394	64.959		18.801	21.547	23.554	6.549	8.344
	179.034	6.76	3.803	15.949	2.429		16.794	3.697	13.098	11.513	347.612		6.232	5.07	13.731	4.964	70.874		56.404	7.394	3.591	1.056	36.863
	10.985	173.648	3.274	0.951	39.821		20.597	23.026	90.943	20.703	375.814		6.76	3.697	5082.04	2.746	3.169		12.886	15.21	202.272	3.908	4.542
	38.131	127.384	60.101	0.951	171.852		16.161	2.007	294.166	105.414	33.378		54.608	130.024	23.343	1.056	35.807		9.506	7.711	168.789	128.334	19.752
	63.481	11.936	1983.11	28.624	85.768		1.162	101.823	114.286	59.044	149.354		31.371	385.531	102.984	13.943	16.161		11.619	9.401	51.017	174.281	175.76
	24.399	3.486	42.567	36.441	3.591		23.871	5.809	4.119	10.14	11.196		3.38	33.8	15.949	6.549	22.815		11.83	6.443	201.849	3.063	32.321
	7.288	8.767	26.934	67.494	12.675		3.274	79.008	4.964	31.159	1112.76		1.796	14.999	345.499	120.201	2.429		8.873	1.268	133.933	4.436	151.149
	45.63	24.083	22.287	5.809	548.827		32.427	1.373	4.964	21.336	4.331		5.176	9.189	47.426	66.861	4.542		117.877	393.031	565.199	4.436	120.835
	1.901	9.506	208.398	16.372	123.687		17.428	0.951	7.605	47.848	8.978		34.751	8.767	2.218	44.891	21.547		0.845	281.174	27.991	5.704	68.868
	22.498	4.542	46.898	114.075	19.329		42.144	13.098	115.448	95.168	2.535		42.989	5.281	38.025	6.443	3.697		5.387	2.641	279.589	191.181	30.209
	4.014	9.612	64.748	1345.77	5.493		49.961	25.773	10.879	3.274	4.119		16.583	107.737	6.232	10.985	3.591		23.66	3.274	98.654	17.428	8.344
	66.332	7890.72	24.399	21.759	19.646		37.391	177.45	10.774	3.697	6.549		62.213	176.922	78.163	5827.01	3.063		4.436	115.343	10.985	10.562	293.109
	48.693	3.169	4236.72	37.602	21.336		45.524	0.951	85.873	100.133	2.324		28.413	31.159	3.38	220.756	4.014		20.597	72.459	124.004	309.904	40.243
	14.154	5055.64	62.741	31.159	23.871		926.543	1215.11	33.378	8.344	12.253		6.232	3.591	100.344	117.244	3.169		7.499	1.69	1.69	162.346	74.043
	18.801	892.003	309.059	183.471	17.428		55.77	32.638	22.815	35.068	7.922		8.344	2.852	16.583	17.428	11.513		163.402	201.744	4.119	13.098	76.05
	105.519	0.634	2.007	8.661	13.52		14.365	8.239	63.375	1.268	1240.46		2.535	39.187	1.268	0.739	5.07		72.036	83.549	27.146	26.934	47.214
	1.056	12.992	441.618	260.999	15.104		6.971	5.493	1.901	18.484	78.585		10.351	20.386	2.429	53.446	3.274		226.037	63.692	11.83	8.873	197.836
	1.69	12.253	282.547	65.171	0.528		30.314	10.351	206.074	20.069	274.308		88.831	6.76	198.786	30.103	11.302		85.873	32.004	4.753	14.576	238.29
	13.098	131.926	40.771	52.707	616.744		37.18	6.971	97.703	3.486	126.75		22.709	68.551	27.146	2.429	39.398		3.591	14.893	241.881	12.886	439.189
	13.626	20.914	1675.53	8.767	9.506		162.346	2.958	365.674	13.52	98.443		113.019	36.335	28.519	6.126	20.597		18.801	1.796	383.102	1.056	112.279
	1.796	7.605	1072.09	0.106	263.957		23.766	3.803	96.013	185.689	6.126		53.129	1.479	8.978	13.626	10.457		18.273	2.535	17.006	127.384	45.419
	58.939	424.084	20.28	5.176	9.718		8.133	1.584	9.295	0.951	74.677		5.598	1438.19	303.989	67.494	206.18		2.958	276.209	25.773	50.7	448.061
	14.154	21.125	94.006	3.486	24.822		59.467	2.113	4.542	13.309	24.822		18.801	129.074	27.779	3.274	1.796		1.056	152.417	520.837	9.612	22.815
	0.739	4.964	14.471	16.9	11.408		36.441	6.021	18.907	40.032	0.634		2.746	79.113	10.562	4.225	4.436		3.697	30.103	34.434	2.324	33.483
	11.83	89.148	209.454	10.457	65.276		200.265	0.951	37.286	172.274	2.007		106.259	256.246	264.485	25.033	2.746		2.852	59.995	30.526	59.678	69.924
	6.021	49.538	14.154	4.436	6.654		5.598	367.998	17.111	139.742	132.771		208.292	2.535	129.179	156.959	44.679		154.635	8.556	1.796	24.716	72.987
	31.054	1199.79	1.056	6.443	19.329		144.812	438.238	67.494	802.116	43.518		15.633	9.823	25.878	2.958	3.591		19.646	27.779	27.568	30.526	119.568
	2.113	7.394	9.506	4.119	26.723		4.753	266.703	32.849	1487.83	89.042		34.434	11.619	213.468	5.493	5.07		45.841	23.766	16.161	62.002	127.067
	19.012	6.021	3.169	65.171	49.538		55.242	10.774	10.351	22.287	278.005		39.926	56.615	19.541	3.591	8.133		7.499	6.866	17.851	23.449	1.479
	5.704	77.212	6.76	75.099	6.971		420.81	1.901	4.225	8.344	4.859		2.958	19.646	29.469	5.809	26.618		16.266	6.971	211.884	28.413	3.274
	2.641	1.373	95.591	232.586	8.45		0.739	39.187	6.021	33.589	219.594		2.852	7.922	4.331	7.077	2.746		14.365	35.913	12.041	33.906	29.786
	7.605	30.314	131.503	66.861	6.232		486.298	0.317	3471.47	308.214	15.104		23.132	38.025	15.21	34.539	6.549		167.099	17.428	5.809	47.32	1418.54
	11.302	24.928	5.387	106.787	1.69		317.72	7.922	67.811	899.503	30.103		27.885	23.871	9.612	8.027	5.704		101.928	4.225	24.188	0.951	592.873
	8.344	70.558	0.845	21.864	1082.87		7.394	931.507	435.492	14.259	97.175		17.428	31.159	48.271	23.766	7.499		359.019	80.698	216.637	2.113	20.069
	14.471	31.054	48.799	1.584	27.674		288.673	113.969	702.301	2.958	139.108		24.716	23.449	7.816	11.724	143.544		152.628	155.058	6972.2	24.505	55.031
	3.697	166.571	2085.35	11.724	9.189		784.16	603.964	65.804	35.384	75.944		2.641	54.186	6.126	8.133	4.225		79.324	188.224	735.889	17.745	4324.92
	5.493	53.024	59.044	2.641	70.241		132.348	671.775	151.044	50.806	6.549		1.056	23.132	2.218	115.659	1.056		4.753	2.852	237.339	3.908	51.228
	35.807	4.014	80.381	19.012	55.031		55.348	1879.17	4.753	110.273	543.335		96.541	40.349	31.582	15.104	2.429		42.884	13.098	256.563	11.936	126.116
	4.859	1630.96	2.429	0.423	4.647		66.966	44.785	18.801	3.697	4.542		45.841	9.401	11.302	17.428	22.815		1829.11	49.538	23.66	4.436	12.886
	3.169	490.734	50.7	20.597	18.484		175.654	1.162	1662.85	9.401	6.654		117.033	46.053	7.499	6.232	2.641		315.924	46.369	43.94	31.793	32.11
	7.605	4.119	76.156	6.76	2.429		337.049	3.591	131.186	284.765	104.146		4.647	27.568	11.724	3.063	7.922		42.884	10.668	4.331	45.208	474.784
	32.955	56.509	18.273	14.787	37.708		14.682	6.021	31.688	421.021	85.134		14.576	6.971	45.524	227.939	32.216		5.07	10.351	19.963	8.027	8.556
	74.149	80.909	9.506	28.73	37.286		18.168	7.711	122.736	69.607	20.069		206.603	2248.33	0.211	228.995	14.893		16.161	4.331	5.387	8.027	1.373
	25.561	8.873	3.169	0.739	2.958		206.708	2.324	30.42	14.999	24.294		127.701	2.641	244.733	122.525	3.274		16.161	19.224	17.111	5.281	5.704
	22.393	71.086	3.274	24.716	5.281		1580.26	4.542	68.128	92.316	0.951		16.055	93.795	17.217	392.397	0.634		23.449	28.73	49.855	3.063	6.338
	55.559	25.561	3.169	7.922	317.509		22.181	0.951	15.949	301.243	1.479		202.378	35.279	603.753	36.758	11.196		267.865	34.645	477.531	147.453	6.76
	75.311	156.008	12.992	19.646	0.739		2.852	2.007	151.678	80.169	1106.63		5.809	0.317	7.288	1201.27	0.106		104.569	30.631	210.194	40.56	14.999
	46.369	37.18	12.358	246.212	9.189		0.634	1.69	4.647	19.646	322.473		6.232	49.749	11.724	79.536	17.006		171.218	21.125	1.901	25.244	53.235
	12.992	4.331	71.614	5.704	38.342		1247.96	23.766	24.083	98.654	13.203		2.007	4409.42	3.38	68.234	155.586		86.507	0.739	8.45	7.394	158.86
	19.118	2.324	2.324	0.739	2.958		27.146	76.05	1690.95	3.486	9.612		14.999	16.689	6.549	116.082	6.443		3.697	87.246	34.011	7.183	81.331
	81.014	68.445	5.704	399.791	47.531		10.562	6.654	81.859	187.273	2795.89		10.562	5654.74	3.38	72.142	7.816		68.128	23.554	4.859	16.689	174.809
	1670.78	1926.18	20.069	21.231	8.767		2535	8.661	52.707	54.925	35.279		13.309	7.288	14.787	55.876	2.746		16.478	26.829	369.159	27.674	2308.65
	2009.3	25.35	11.302	327.543	17.323		0.317	15.844	494.536	29.047	124.954		9.401	39.081	28.73	281.491	21.759		3.169	7.183	127.384	23.026	81.965
	594.88	0.845	14.048	13.626	2.007		14.365	656.143	159.177	15.527	36.969		84.817	139.953	80.592	154.107	0.739		7.711	4.542	22.921	32.744	23.132
	36.758	14.048	2.218	293.743	12.992		31.476	4.859	28.836	2.218	110.801		31.688	64.642	36.018	22.393	46.053		94.534	1016.32	10.246	2.324	19.858
	102.456	6.021	24.611	430.422	12.464		5.915	414.05	11.091	0.951	480.277		63.481	12.781	1.162	234.593	0.423		567.418	103.301	31.265	4.542	16.478
	336.521	7.288	40.56	1.162	6.549		3.274	2.218	134.355	89.359	1315.98		45.736	7.922	0.634	510.38	1.268		34.223	14.154	29.575	21.336	23.238
	3.486	3.803	23.132	18.801	12.781		11.83	1.796	32.638	107.949	97.914		23.343	2.429	8.344	1.162	2.958		9.295	1907.9	1.268	0.739	14.682
	51.545	2.641	6.971	10.351	14.154		5.387	2149.57	159.811	105.731	2001.28		28.624	2.113	110.484	6.76	44.257		19.224	79.219	358.597	2.852	17.639
	2.429	38.342	20.069	159.494	2.852		11.724	314.762	33.061	166.359	15.949		13.731	8.45	128.44	1.162	6.126		4.753	13.098	394.826	3.38	13.52
	18.062	24.399	17.217	181.253	1.479		14.154	1.479	6.021	8.978	4.964		4.014	0.739	45.102	6.126	7.605		14.787	5.915	4.859	4.014	43.518
	91.999	13.52	7.816	91.26	32.744		4.964	62.636	332.719	249.803	17.217		2.641	577.346	9.929	29.469	29.153		43.518	22.287	121.152	13.098	6.021
	53.341	2.958	25.456	203.328	92.844		19.012	3.38	68.128	10.774	176.499		7.183	184.21	27.463	33.8	23.66		28.202	0.845	8.556	3.486	68.023
	3.38	3.697	14.259	611.041	46.792		36.758	31.899	52.918	24.505	3399.54		6.126	28.519	163.824	20.386	1.901		274.097	11.408	25.667	4.225	41.933
	33.589	16.266	0.951	15.421	44.679		14.259	1.056	1.796	12.886	2.958		11.196	37.391	198.258	1.796	0.528		7.077	128.863	19.012	5.07	58.833
	35.596	7.605	1.796	8.45	112.279		0.634	371.694	29.153	40.243	90.943		180.408	9.718	848.803	9.295	4.014		80.803	3.908	86.084	2.746	121.574
	6.021	46.475	4.225	32.004	6.971		416.691	445.843	23.449	166.254	24.822		20.28	20.174	1146.24	9.401	33.694		26.406	23.66	10.774	1.69	110.167
	18.484	26.512	5.493	152.945	36.969		140.376	268.076	14.365	50.806	26.301		3.803	6.232	297.863	406.234	14.787		8.873	2.535	0.951	2.641	31.371
	1.901	50.066	0.845	51.862	8.873		63.903	176.499	30.631	97.281	1.901		5.281	52.918	1224.3	2.746	19.329		29.047	3.697	207.87	174.809	71.297
	5.809	8034.58	273.463	1.901	11.619		17.639	809.299	125.06	81.331	12.781		135.094	32.533	51.545	3.908	1.162		50.594	3.803	4.647	290.046	24.716
	0.951	49.432	213.891	6.021	2.535		38.131	26.089	6.866	690.576	18.484		5.598	1.796	974.919	3.591	16.583		17.111	0.951	30.42	7.077	18.168
	7.288	32.004	45.947	232.269	3142.03		121.68	154.107	3.591	27.674	4.859		102.245	36.652	28.73	27.04	39.926		7.077	1.479	19.435	2.218	41.616
	3.908	20.597	3.697	265.647	0.317		28.413	6.549	10.14	23.871	100.978		260.26	23.766	12.992	10.985	590.233		8.45	527.174	1.162	5.387	1078.33
	8.133	509.429	5.387	1.162	388.7		1.373	0.634	4.542	9.929	4.436		279.906	6.443	6.021	87.141	29.364		18.801	3.169	7.711	131.186	105.625
	3.063	91.049	2.641	57.143	206.497		8.133	12.041	13.626	2.641	14.154		7.077	14.576	110.378	630.476	1.69		33.694	10.14	8.133	30.314	364.618
	4.119	11.724	10.774	238.396	395.143		278.005	22.709	11.196	2.852	0.634		16.794	10.668	307.474	3.063	11.196		5.07	24.399	31.159	39.821	57.46
	95.379	21.759	154.107	326.064	134.566		1.69	74.571	494.748	860.421	1.796		4.436	55.348	403.171	18.696	42.144		639.876	52.39	2.535	10.246	122.948
	17.956	34.434	62.53	75.522	33.061		7.922	32.004	91.366	3.063	16.9		117.983	23.026	11.408	2.429	5.281		1008.4	187.167	56.087	15.104	9.823
	2.641	2.852	227.728	6.126	44.468		177.661	25.244	7.816	65.276	0.951		5.704	8.767	475.101	47.848	55.453		81.437	2010.04	3.908	6.338	254.451
	9.295	9.189	121.469	7373.89	8.239		418.803	27.885	49.855	195.301	4.119		75.733	1.69	463.166	464.539	255.084		254.345	0.951	3.38	0.634	92.316
	18.696	0.739	3.063	15.844	2.007		2.113	3.486	46.053	29.997	5.915		114.392	2.429	4.859	41.299	8.978		15.633	216.637	443.731	6.126	4.119
	9.295	24.611	8.027	19.012	1.268		7.183	2.852	64.537	19.224	8.027		8.344	76.05	110.906	86.401	356.273		6.549	78.585	402.748	9.718	21.231
	5.809	4.753	3.063	2.218	20.597		24.294	41.828	4.859	89.57	7.711		6.126	24.611	7641.34	4.964	185.161		235.227	62.213	3892.49	74.466	16.161
	18.273	1.901	0.423	3.803	6.76		96.647	75.733	1.69	19.435	83.761		10.034	3.169	899.608	18.801	2.958		43.518	12.569	15.421	59.361	50.911
	18.907	18.484	158.015	1.69	1.69		340.113	44.996	46.581	53.446	30.314		1.69	580.409	262.478	3.697	10.985		120.307	20.069	13.626	5.915	49.432
	3.697	149.565	20.914	3.169	15.421		45.102	1051.71	33.378	14.259	13.414		331.663	50.489	1914.14	42.356	10.457		64.854	100.978	2.218	10.985	31.159
	8.556	46.158	58.622	2.852	41.299		18.273	1.373	194.033	32.216	10.351		80.698	42.039	499.712	508.056	12.886		84.817	1159.87	129.602	10.351	23.449
	77.001	39.504	12.464	4.436	19.118		11.513	198.681	29.364	12.675	5.281		11.83	168.049	1530.08	26.512	13.837		211.039	33.8	52.707	128.863	6.549
	3.169	16.055	56.509	0.106	397.678		51.545	71.825	30.42	8.873	20.491		63.798	162.979	468.764	16.9	11.196		541.011	50.489	3.803	244.416	9.295
	13.943	0.317	38.976	2.324	14.576		13.414	18.801	212.623	12.781	105.308		51.017	1666.23	1.056	50.383	8.133		164.458	77.951	71.931	46.158	5.915
	2.218	4.436	17.851	6.021	47.109		10.562	10.668	468.13	287.194	11.302		31.054	13.837	1.901	1951.21	2.535		88.725	103.301	50.278	20.491	18.59
	1.373	31.793	22.287	17.745	23.554		95.168	61.791	21.653	51.439	43.94		318.988	54.714	3.169	1894.6	21.97		69.29	906.474	4.753	118.089	15.421
	5.809	2.641	95.168	15.316	123.793		25.244	84.078	648.854	2464.55	3.486		61.474	18.168	36.652	992.453	50.7		35.596	25.456	4.753	29.681	63.586
	0.423	7.183	2.113	5.809	105.836		234.065	4.647	62.741	83.021	17.534		282.441	12.464	20.597	5.598	42.673		15.738	1.901	2142.81	4.436	94.006
	18.379	10.351	8.344	24.822	7.711		23.871	315.924	68.234	627.518	121.997		6.126	7.077	11.408	108.583	21.231		2.746	2.535	200.054	15.633	56.615
	5.598	44.257	14.576	4.753	426.197		6.549	83.761	334.409	20.069	19.012		8.133	367.681	8.873	15.527	11.408		4.859	20.808	126.433	18.379	31.159
	4.859	28.096	31.899	21.442	5129.47		189.174	6.232	1328.76	35.068	4.964		98.443	74.571	2.535	9.612	50.594		8.873	70.663	86.824	4.647	25.561
	6.443	0.317	7.288	180.724	853.661		99.71	0.211	91.471	71.403	0.423		105.836	56.404	106.048	93.689	22.393		74.677	34.962	29.469	53.657	5.915
	10.14	41.511	29.997	10.774	15.104		215.581	0.423	28.519	31.371	8.767		86.824	17.006	29.997	354.583	0.951		128.651	5.809	2.007	43.834	7.816
	3.697	202.589	586.43	17.956	88.619		129.391	48.271	8.344	19.752	238.079		7.499	2.218	34.539	26.723	56.404		156.959	759.444	27.674	22.498	56.298
	3.38	60.418	28.836	1.162	15.21		67.283	19.012	9.718	73.304	23.238		92.528	58.833	226.566	0.106	50.383		129.813	50.806	764.514	3.169	12.569
	7.605	15.104	19.541	10.985	3.274		0.634	40.032	12.253	13.52	0.845		10.14	23.238	197.202	12.675	16.583		41.722	38.87	173.119	37.18	13.626
	14.893	85.979	80.064	15.527	31.371		1.796	5.176	7.499	36.229	7.077		82.599	54.714	1752.85	160.761	4.436		45.313	34.751	61.157	48.059	101.083
	188.329	2.007	91.683	6.971	6.549		34.011	28.624	6.654	14.893	16.372		1.056	159.599	4.331	17.006	0.951		102.351	414.789	818.383	5.387	96.224
	101.506	11.83	11439.5	12.886	5.809		23.132	0.423	2.007	94.112	153.051		75.839	1373.65	16.055	14.154	40.877		5.387	192.449	107.843	6.971	29.469
	12.464	17.006	14.576	3.908	3.591		17.534	1.056	24.716	244.839	24.399		6.654	92.422	1882.13	14.471	23.554		7.711	12.358	1804.92	15.844	58.516
	4.119	4.859	366.73	57.671	9.612		124.849	7.499	391.869	141.221	0.528		25.244	22.287	30.209	406.339	37.814		8.661	1768.06	222.024	3.591	68.339
	16.055	10.562	31.582	49.961	40.877		458.518	13.943	140.587	1.796	14.999		49.221	0.423	13.52	71.403	58.199		5.704	100.872	481.967	5.493	43.729
	3.591	7.711	0.739	8698.43	6.971		47.954	9.929	12.781	725.433	0.317		67.494	0.739	25.878	45.947	101.4		3.803	27.568	60.946	12.041	12.569
	56.298	4.753	9.823	41.828	89.781		6.76	1568.85	1165.68	54.291	1717.67		128.968	34.011	109.85	4.859	17.217		1.69	258.359	64.854	17.111	34.434
	3.908	211.673	1.373	44.257	15.21		47.003	138.263	37.708	85.134	138.474		41.405	563.826	9.401	15.844	52.918		7.816	1.373	23.132	121.046	4.753
	103.829	9.084	3.38	92.211	85.028		151.044	151.678	16.689	381.306	5.387		30.737	27.146	7.288	6.232	283.603		38.236	38.659	36.018	42.25	74.677
	16.266	9.823	33.483	54.08	11.196		60.629	12.675	73.093	3.697	89.042		425.986	7.711	18.379	30.948	15.104		25.456	21.442	3.169	2.852	88.197
	3.908	13.52	3.169	80.592	14.471		119.145	4.014	13.626	1771.33	7.922		11.302	74.149	24.822	0.423	11.513		333.458	513.866	49.855	173.964	48.165
	7.605	6.443	19.858	13.52	4.014		129.391	8.661	1434.39	217.165	27.568		3.486	23.343	16.9	1567.05	97.598		12.253	559.812	58.094	8.239	175.126
	47.637	10.14	4.331	6.443	36.018		0.634	1.268	816.376	931.929	192.554		3.063	7.499	49.538	5622.63	56.404		34.962	129.074	51.334	950.731	33.8
	64.326	17.639	3.38	40.56	14.365		10.668	16.055	13.309	7.183	189.386		2.007	2.535	4.542	95.485	18.168		11.408	328.494	6.443	8.556	67.917
	25.139	15.316	3.063	78.479	23.343		5.176	3844.86	23.766	9.823	23.026		6.76	3.38	2.641	493.586	107.737		111.54	1786.65	16.372	28.73	374.546
	9.506	25.878	5.809	137.524	10.879		257.725	30.103	89.57	150.833	123.476		257.514	15.104	4.542	538.265	9.295		30.631	2176.09	303.566	39.926	135.411
	6.549	0.845	9.401	7.394	3800.39		49.116	130.341	37.814	3.274	14.999		6.021	223.925	69.818	1144.97	0.845		11.619	1.162	167.733	6.76	11.302
	49.961	17.111	0.845	128.863	78.479		20.808	3.908	5.704	25.667	94.323		2.007	38.342	23.977	21.547	152.628		46.792	7.711	51.123	2.535	6.866
	42.356	11.408	14.893	55.031	16.372		87.458	7.499	384.686	991.924	33.378		46.053	55.453	771.485	675.683	31.371		51.334	97.914	224.453	109.322	11.196
	25.033	8.661	47.531	280.118	19.752		295.222	2520.21	4729.99	2.324	1.796		4.119	1.479	127.595	302.088	32.533		20.597	0.845	4.225	117.033	12.464
	11536.2	17.745	22.709	54.608	24.505		259.415	4127.3	8.027	3.063	31.476		54.186	4.225	171.958	4.753	36.652		74.677	1.584	778.984	11.619	17.534
	12.675	103.09	29.469	44.891	22.921		2.641	86.084	11.302	19.435	8.978		10.668	6.338	102.773	6.338	41.933		189.703	11.513	344.232	405.283	1.268
	17.323	5.809	1.268	2.535	14.154		2729.03	554.426	32.004	62.636	121.786		20.174	1.162	54.714	41.194	15.527		6.126	6.76	144.495	186.956	63.481
	19.118	7.394	115.871	41.722	10.034		3023.2	4.331	28.73	352.048	93.689		15.21	0.423	164.881	5.915	77.529		10.351	26.195	368.526	63.481	17.851
	16.9	3.803	249.592	9.929	25.456		1220.6	8.661	884.926	84.183	4.753		2.113	4.753	3736.59	3.803	42.884		16.583	29.153	521.259	405.706	22.709
	17.428	2.958	3.591	1.901	5.176		20.597	28.202	181.781	11.936	7.077		2.535	4.436	5817.61	27.885	76.367		8.45	13.52	53.341	48.904	67.811
	478.904	11.302	44.046	126.539	11.091		3.169	318.142	2399.17	41.405	32.321		84.289	17.851	1306.79	27.146	3.486		1283.45	94.957	33.272	10.14	265.119
	31.582	167.204	27.04	30.631	3.169		134.566	85.662	19.012	8.661	24.294		23.026	169.528	3461.23	19.541	2.852		26.195	0.845	183.365	10.457	113.653
	18.379	210.933	20.914	10.668	1267.08		17.956	4.014	768.105	5.809	376.025		18.59	85.451	64.537	24.716	3.169		19.012	13.098	68.445	23.766	10.457
	28.73	22.181	1.162	0.951	48.271		9.401	155.163	723.743	2269.14	7.922		25.033	2.641	9.506	114.498	77.212		54.186	24.294	25.773	28.202	15.21
	71.614	15.316	10.246	2.218	40.138		17.745	2.429	42.567	11.302	63.058		27.568	2.958	52.707	137.101	29.997		1878.43	10.668	1.373	24.399	3.063
	48.059	5.915	3927.45	26.406	22.815		7.711	1.162	6.021	45.102	3464.18		35.701	1.162	7.077	145.657	11.936		3.38	66.649	95.908	28.624	0.951
	24.822	0.739	4237.99	13.309	5.493		46.369	26.406	45.313	2138.7	48.376		4.859	23.026	23.871	117.033	584.317		23.132	9.084	342.859	63.692	136.362
	27.251	258.887	44.046	13.626	51.439		33.906	105.625	53.024	135.306	4.859		3.591	2.535	14.259	6.232	440.351		3.803	24.294	1103.78	140.693	392.186
	9.084	256.88	16.689	17.745	6.549		9.084	13.837	57.46	32.533	4.542		9.189	5.176	36.018	82.493	8.556		3.486	28.836	846.796	25.773	111.963
	6.443	6.866	80.909	1.268	8.027		21.547	30.526	18.062	9.929	5.387		3.063	9.823	19.963	58.939	2.958		2.113	18.907	92.422	5.493	97.492
	28.73	33.694	140.27	78.163	185.583		35.49	6.866	6.549	224.981	14.576		2.324	153.262	212.412	102.773	14.259		2.324	7.394	146.291	30.948	13.837
	17.639	20.491	234.065	4.542	3.486		16.689	62.53	3.486	67.811	33.8		3.38	262.901	100.978	19.541	188.752		13.837	1.056	172.274	9.084	128.229
	55.031	50.489	137.312	12.041	38.236		5.809	152.523	102.879	5498.63	24.716		247.585	23.66	180.83	10.034	47.32		37.708	10.668	179.457	20.703	3.063
	35.913	230.896	17.956	1.584	11.091		15.844	67.6	4.647	549.567	96.647		30.103	24.928	786.695	11.724	34.645		16.055	2.641	311.171	39.821	19.435
	14.893	82.599	112.491	51.228	10.14		9.823	85.556	4.225	60.312	0.317		124.638	25.35	13.414	18.696	57.566		39.926	10.034	28.202	461.581	17.534
	54.397	19.435	3.486	16.372	9.823		30.737	191.181	19.752	43.834	1.479		68.234	2.746	76.156	212.834	2.324		16.794	131.714	59.784	357.224	8.133
	2.007	1.373	27.463	4.859	21.653		8.556	2.324	15.527	37.814	1503.78		99.499	5.07	36.863	241.036	2.641		128.018	6.866	31.899	190.125	47.32
	145.023	3197.8	39.081	2.958	138.686		2.429	536.469	19.118	43.095	4.542		285.293	25.456	16.689	45.102	3.486		129.074	2.113	178.506	16.583	0.845
	331.451	2.429	309.376	15.633	30.631		5.915	2.535	7.288	3.803	41.088		271.245	21.864	2.324	216.426	6.021		55.453	32.638	9.084	121.152	3.697
	43.412	0.951	68.128	4.225	113.019		9.506	0.845	7.816	1.901	1.162		25.033	15.844	10.246	13.626	3.274		184.633	179.774	21.125	59.889	346.556
	170.796	12.886	119.039	13.203	3.908		2.852	20.069	35.173	1.901	723.531		70.769	20.808	27.779	14.048	358.386		269.766	26.406	15.527	15.633	20.703
	380.989	16.161	3.697	8.556	0.951		20.069	155.797	16.055	5.176	39.504		143.756	22.181	17.111	658.889	39.081		4.225	76.789	57.46	39.398	734.199
	3.908	1.901	44.679	1.479	1.796		1.056	47.531	30.631	23.132	5.387		453.026	208.187	37.391	450.702	1.901		3.274	6.76	2.641	3.908	102.668
	92.739	7.922	7.394	3.063	2.113		11.196	8.027	17.428	172.486	10.562		1.268	4.119	1168.42	338.528	0.634		28.202	61.157	3376.51	6.338	115.237
	10.457	4.014	0.951	67.494	1.268		26.934	11.196	11.83	1559.76	0.634		2.324	6.232	5.704	31.371	13.943		343.07	3.591	2018.49	41.828	84.711
	8.556	0.951	12.358	5.387	8.45		9.084	5.387	220.439	58.833	1.056		2.324	6.866	20.386	617.801	83.972		3.38	84.289	88.408	65.065	1059.84
	3.803	0.845	11.83	4.119	232.903		35.596	17.111	6.338	123.264	10.14		4.753	10.351	8.556	1.056	2.535		4.331	114.709	69.396	58.094	211.144
	15.316	35.49	6.126	5.07	11.513		2.324	480.066	8.133	40.243	4.225		5.07	6.021	9.506	1286.72	1446.22		667.022	102.351	25.667	61.368	466.863
	10.985	4.436	44.257	2.113	30.314		363.772	36.546	325.431	48.482	105.414		15.421	30.103	71.719	299.869	35.279		119.039	76.895	57.883	45.841	248.008
	103.618	2.007	10.246	0.739	21.653		2.113	27.991	204.701	98.654	94.006		15.421	124.954	22.815	1188.6	16.689		9.506	511.119	1.268	169.845	20.491
	14.365	0.423	4.014	691.738	2257.73		19.329	255.718	12.886	1663.7	110.061		18.273	63.058	6.021	1008.19	140.376		21.336	138.791	2.324	15.844	77.106
	10.668	17.428	6.654	55.981	11601		279.167	2.218	31.688	22.709	31.159		14.365	110.167	126.011	24.294	1.796		43.834	10.879	50.278	438.133	117.561
	904.361	0.845	10.562	0.423	4268.41		61.685	11.936	114.286	26.829	224.453		64.959	32.744	1908.01	409.825	16.161		18.59	62.319	15.316	999.529	22.709
	422.817	15.738	33.694	295.75	348.14		10.774	15.21	75.944	32.744	72.564		105.836	304.834	105.308	11.302	22.076		343.387	5.704	6.338	655.614	27.568
	15.104	5.387	9.189	46.053	59.573		25.773	8.027	28.941	12.464	4.119		95.379	219.594	80.909	6.654	5.07		406.234	33.272	7.288	517.562	54.291
	188.118	3.169	7.605	4.014	29.892		9.718	12.569	11.196	150.621	15.844		387.855	11.091	5.07	48.271	8.556		591.5	9.189	26.934	34.011	33.061
	59.995	2.535	5.07	1.056	39.187		48.271	14.259	27.04	2.218	4.119		38.659	30.526	97.175	67.494	2.958		264.062	4.331	12.041	29.681	29.681
	11.83	1.373	47.214	21.97	73.938		17.534	18.484	1015.27	38.764	2.535		2.218	45.947	180.302	4.964	168.155		8.239	72.67	40.138	48.799	23.66
	2.324	17.428	7.711	44.363	182.626		24.822	0.845	13.943	813.418	6.549		9.718	751.416	58.939	2.007	14.154		1.796	13.731	201.955	1168.21	14.787
	111.963	9.189	75.733	100.872	46.158		31.054	5.809	13.203	4.225	6.971		17.323	71.297	71.508	21.125	9.718		2.429	11.513	8.661	25.773	6.549
	16.583	51.017	2.641	21.231	2.535		52.073	48.482	116.082	9.823	66.649		4.014	21.336	84.5	7.922	5.387		53.024	12.358	1.796	17.956	112.068
	201.216	9.401	10.034	50.278	13.098		124.215	9.612	1.901	201.321	3.697		17.111	161.395	12.147	4.331	4.542		69.501	40.666	7.499	2.852	80.909
	124.215	3.38	28.941	64.22	38.236		69.818	3.169	81.226	3.38	413.205		28.096	53.869	112.068	2.746	2.641		34.223	71.086	7.922	11.408	146.396
	7.077	2.852	11.724	2.852	20.069		0.528	53.235	56.932	7.499	117.349		94.957	9.506	10.246	1.796	10.457		16.583	5.809	2.113	1.901	4.119
	3.591	15.316	7.816	27.779	10.351		1.162	1.056	11.196	27.463	8.133		9.506	7.394	1.796	280.012	23.343		3.486	68.128	22.709	74.043	120.413
	26.512	29.047	8.027	80.486	11.619		5.176	129.285	40.56	122.525	1158.49		326.064	14.259	1352.95	12.147	0.634		25.667	6.866	66.121	21.759	27.779
	29.047	69.713	30.209	205.758	21.864		1.162	158.438	23.343	20.174	122.948		26.934	3.38	42.567	27.779	10.034		211.884	2.218	0.423	40.454	5.493
	201.744	4.542	118.934	67.917	7.077		178.612	35.807	15.844	19.963	0.951		3158.72	48.904	3.38	35.596	23.977		128.334	42.884	66.544	5.176	27.146
	26.934	21.442	53.446	5.493	23.238		6.866	60.629	1206.55	34.962	364.934		238.713	52.39	1.479	3.486	111.54		13.52	3.908	5.493	4.436	39.926
	10.774	6.654	55.136	122.525	16.055		9.401	32.955	11.936	385.743	0.423		327.543	8.45	1.162	7.605	25.244		5.915	18.59	36.124	15.316	145.34
	2.324	339.056	267.442	1.373	7.288		12.569	5.598	211.778	772.119	147.981		750.466	13.837	2.746	7.077	1688.2		6.76	3.591	188.858	14.893	20.808
	29.575	4.225	19.858	5.493	12.253		5.07	1.056	68.339	50.383	485.136		273.674	4.225	59.467	9.189	81.754		43.623	7.183	3871.05	32.849	61.368
	82.916	6.76	22.076	2.429	11.936		65.699	10.985	65.593	8.873	4.964		806.975	76.367	54.291	44.046	12.886		8.45	6.866	19.435	4.859	180.091
	151.572	6166.49	4.436	37.286	132.348		17.956	6.021	12.886	10.14	10.351		633.222	33.694	1689.68	0.739	44.468		19.752	11.302	44.257	67.494	41.405
	49.855	87.458	4.753	5.915	58.411		47.954	66.544	113.23	66.016	11.196		6.021	3.169	2.007	5.176	14.576		24.822	62.847	1.373	18.907	9.401
	20.703	54.08	8.344	19.963	325.008		3097.45	44.996	22.815	7.816	2.429		3.063	29.575	3.908	67.283	4.436		4.753	100.344	429.894	36.969	160.233
	13.309	42.356	46.475	44.046	20.386		86.612	23.343	30.843	43.623	0.951		16.372	1.056	11.196	712.335	20.914		242.198	8.978	16.9	4.753	24.188
	105.625	21.759	5.598	8.239	19.224		21.759	36.758	85.345	847.218	3.169		11.302	6.76	67.283	19.224	3.274		25.667	4.436	36.124	7.394	70.874
	97.175	60.946	3.697	7.605	9.189		14.048	105.097	4.964	233.748	0.739		161.818	34.856	22.287	15.316	12.886		7.922	6.338	18.907	65.065	4.225
	22.498	133.721	7.816	31.265	10.985		46.686	3.486	20.914	76.261	98.548		185.794	6.549	949.991	58.939	120.624		343.704	3.803	18.062	7.922	4.753
	55.77	19.329	51.439	13.626	48.904		26.301	1.796	5.493	72.036	122.419		84.711	57.566	116.293	20.28	61.685		10.668	164.353	19.118	25.667	2.746
	316.981	28.836	711.701	3.591	27.779		582.628	40.666	14.259	217.693	16.161		53.235	20.703	170.69	60.523	151.783		163.085	218.116	28.624	38.236	3.169
	63.903	36.652	108.688	18.59	26.089		167.416	41.616	4.964	671.986	11.936		9.506	43.729	12.781	280.012	17.745		48.376	25.667	14.259	1.056	17.851
	3.591	50.172	10.14	17.851	5.704		2.007	9.929	2.746	50.806	13.098		5.07	17.639	35.807	41.299	5.281		11.302	0.951	4.964	5.387	57.038
	2.007	12.781	102.034	24.716	7.288		17.006	0.423	1.268	8.556	286.033		23.132	98.865	110.589	225.087	10.14		15.421	2.324	25.244	62.319	4.542
	268.499	17.534	24.294	20.28	15.316		11.83	167.099	2.324	9.612	33.589		15.421	79.113	22.498	40.349	6.338		14.048	4.014	132.454	54.503	58.833
	13.098	7.605	14.365	5.915	1.056		8.873	0.317	111.329	9.929	11.302		59.889	2.429	312.544	85.239	0.634		8.344	6.232	39.926	12.253	2.958
	10.562	5.493	97.069	15.527	9.084		13.943	73.938	233.643	1067.23	4.331		83.444	1.901	249.381	5.387	5.704		19.646	11.513	14.893	2.746	17.639
	154.741	3.38	0.951	7.922	1.056		19.646	325.853	412.994	301.348	14.682		102.034	39.081	42.778	232.586	10.351		8.239	5.07	3346.83	3.803	0.423
	48.587	8.344	66.755	0.739	3.591		9.823	23.871	45.208	1.796	123.898		19.963	88.302	8.45	61.896	3.908		43.201	2.429	59.889	51.651	0.423
	70.98	88.725	77.106	19.329	21.97		31.371	7.711	100.449	388.278	107.737		3.063	130.341	3.591	9.612	227.939		20.174	2.218	8.556	15.844	3.803
	92.211	8.45	10.351	32.321	26.301		9.084	41.616	72.881	35.596	23.026		23.026	0.951	11.83	6.126	3.38		21.336	2.324	17.956	30.42	103.407
	38.553	1.268	29.364	5.915	14.048		48.587	450.913	7.077	91.577	68.551		301.982	8.027	174.493	12.253	2.641		198.364	0.739	28.73	108.583	2.113
	74.149	93.478	3.803	3.274	60.629		38.659	36.652	8.133	37.497	188.118		61.791	20.597	6.971	4.964	3.169		28.096	15.104	16.794	54.608	81.226
	12.781	58.411	20.491	4.014	25.773		485.664	39.926	21.759	109.427	4.964		45.736	3.486	52.707	47.954	2.958		43.518	37.074	22.393	1.056	213.785
	52.496	11.513	50.911	32.004	8.45		15.104	215.792	10.351	141.537	50.383		10.774	2.535	370.744	7.711	13.837		31.688	38.764	397.995	69.607	35.279
	29.047	11.513	10.668	171.429	7.922		72.353	5.809	23.132	60.312	28.836		10.034	9.718	3.591	0.528	1.373		4.647	898.658	151.783	43.201	16.794
	12.886	19.858	3.486	5.07	0.634		18.062	18.59	103.724	107.737	1.479		16.266	6.654	29.892	32.955	0.951		44.257	4.014	14.893	41.616	349.513
	12.992	70.663	18.168	22.815	14.048		33.589	6.76	84.394	6.866	20.597		210.088	1.056	77.106	7.077	43.095		9.189	6.866	5.176	22.921	68.445
	1.901	10.034	28.519	5.809	5.809		9.401	0.739	102.034	18.696	113.441		5.07	103.724	20.386	8812.4	12.041		7.711	103.513	31.371	49.538	45.841
	13.309	121.152	135.411	33.906	284.659		32.321	12.886	0.634	22.393	42.778		17.111	119.039	18.168	17.323	684.133		3.063	43.412	12.464	21.864	3.803
	5.281	5.809	739.058	14.999	47.003		9.612	986.009	14.576	18.273	2.007		1.584	13.943	9.506	4.542	10.879		9.084	65.593	56.721	792.61	193.399
	19.012	12.781	13.943	26.512	31.054		0.739	86.612	112.385	1.162	344.76		31.793	23.871	7.394	12.358	34.328		16.055	3.063	20.28	6.549	43.412
	2.535	25.773	1116.35	131.609	69.501		32.955	9.612	33.378	237.868	8.239		73.304	3.169	6.126	143.122	3.908		30.42	2.852	580.938	24.399	11.619
	12.041	16.689	9.401	27.04	761.873		149.882	3.591	244.944	10.668	246.634		64.326	35.596	53.763	385.637	2.007		56.826	9.929	111.54	122.525	3.169
	7.288	9.823	11.619	33.906	44.363		36.229	5.915	46.158	91.999	19.118		32.427	10.246	2.218	1.584	1302.99		34.117	14.365	6.549	73.726	2.746
	64.748	0.528	54.397	55.981	5.176		18.696	10.562	2.007	402.114	102.245		0.739	29.997	6.338	6.232	16.689		12.253	135.623	52.39	25.139	5173.3
	7.922	3.274	21.759	34.962	30.42		5.809	81.331	4.859	127.067	103.935		0.845	5.07	8.873	25.878	252.233		14.787	34.856	6.126	57.777	1358.13
	102.668	8.556	55.559	23.554	10.774		24.399	117.244	673.676	162.874	30.42		159.705	4.964	4.331	7.183	1.268		45.208	26.089	5.915	73.726	761.768
	104.674	26.301	30.42	10.457	88.302		434.647	4.014	1.479	201.955	34.856		10.562	299.447	5.176	18.801	0.528		37.497	24.294	10.034	40.349	36.124
	1.268	2.007	7.605	50.278	47.531		4.647	2.535	32.955	509.007	5.493		60.84	35.279	9.084	13.309	34.223		11.83	167.838	14.893	21.125	8.133
	154.741	4.119	12.358	19.118	1005.97		8.239	1.373	0.951	16.9	7.394		149.037	7.183	5.281	5.07	20.28		1.584	23.977	25.456	18.907	43.729
	34.856	15.21	3.063	22.181	357.012		223.186	1.056	5.915	3.063	35.068		9.084	9.189	55.559	3319.05	30.526		9.189	2.535	41.194	171.641	33.8
	25.667	7.394	12.781	8.767	12.886		511.436	1.056	107.209	1.162	37.18		23.871	13.626	254.134	28.308	31.582		83.549	27.779	6.338	6940.2	8.45
	46.581	14.154	70.98	11.619	36.018		10.246	845	57.143	4.859	1148.25		6.971	8.978	20.914	3.697	88.408		41.088	2.007	2.113	651.601	74.782
	61.579	0.423	38.976	24.083	47.109		27.251	6.338	61.157	233.643	5.704		10.668	113.019	77.318	41.088	8.978		2.324	23.026	19.224	272.724	6.866
	202.8	19.329	530.026	26.934	207.87		4.964	1.901	142.066	110.273	194.033		2.746	3.591	28.413	24.505	1.584		6.443	55.876	1.901	462.426	4.753
	310.749	20.597	74.149	4.964	28.73		15.421	53.446	59.995	52.918	51.123		55.242	8.556	2199.43	3.274	4.647		7.499	495.698	19.963	20.174	1.796
	67.389	4.331	10.985	282.23	25.033		20.914	64.009	21.231	46.053	0.634		53.129	7.394	1.584	3.803	17.006		5.493	15.844	2.535	44.574	13.414
	212.94	12.041	10.457	395.249	21.653		17.956	24.399	4.119	4.542	107.843		88.619	1.162	53.763	10.774	12.675		1121.95	13.837	62.847	961.504	2.958
	58.094	62.953	6.443	46.792	23.343		48.587	443.519	17.217	1.901	29.047		129.285	164.564	11.196	4.014	4.014		3470.1	107.104	23.871	199.526	18.273
	60.734	30.843	7.816	48.799	9.718		106.364	1208.24	14.154	252.972	26.618		16.478	3.803	41.194	3.908	7.077		32.321	8.027	43.518	64.009	15.738
	28.941	5.809	4.119	7.183	47.003		7.605	6.654	44.257	64.537	134.144		35.384	124.215	110.167	8.556	1.796		69.501	64.537	13.203	31.054	6.443
	14.471	12.675	15.421	27.357	9.718		10.246	79.747	61.685	24.399	6.971		0.634	11.091	1.162	13.098	3.169		20.808	39.293	46.475	4.647	6.971
	268.182	5.493	38.342	1.268	30.526		40.032	4.331	10.774	29.786	850.809		32.004	86.507	85.345	1.268	21.759		11.619	0.528	73.304	37.391	14.259
	92.633	20.069	135.306	16.9	8.45		16.478	7.394	8.978	82.388	87.669		12.781	11.302	146.608	158.649	110.484		70.769	1034.17	3413.59	65.91	4.331
	30.314	336.733	1.056	75.839	10.668		18.484	126.116	6.654	5.598	4.436		5.493	7.394	55.348	30.843	6.126		10.985	129.708	184.738	134.566	7.499
	32.955	265.119	100.133	30.314	34.962		2.113	22.498	2.218	6.654	3.803		0.739	110.695	18.484	68.868	4.542		19.541	22.815	255.718	210.722	3.908
	9.612	114.603	159.811	13.203	4.647		4.859	5.07	1.268	5.704	9.189		230.157	110.906	262.795	79.536	33.378		4.119	47.003	4.014	33.272	12.675
	125.694	5.704	369.793	8.873	0.423		2.007	4.119	39.398	2.007	67.283		21.864	77.74	140.904	144.495	10.457		21.653	501.508	16.9	5.704	12.041
	15.21	6.232	5.176	9.401	23.238		18.59	285.504	122.314	132.454	38.87		22.604	4.014	178.718	60.206	139.108		3.063	4.014	1.373	25.033	44.468
	15.844	3.38	26.723	10.351	15.104		73.515	188.435	24.505	6.654	2.746		6.126	282.124	152.1	36.863	44.996		10.879	5.598	44.574	25.878	11.408
	45.736	6.866	8.344	8.239	4.542		348.034	341.063	43.94	231.108	11.619		0.528	12.569	44.468	70.135	8.45		2.218	10.14	6.654	73.093	9.929
	2.324	27.146	9.718	9.401	13.837		27.04	317.826	10.034	54.397	12.041		49.327	10.034	5.704	125.799	10.879		32.744	219.806	17.534	42.356	26.089
	50.278	18.59	2.852	4.119	1.796		15.527	0.845	14.154	165.937	309.798		124.109	1.69	3.697	391.235	38.659		2.958	59.678	2.007	105.203	2.113
	80.275	29.892	13.52	19.012	5.176		8.027	1.373	1.796	440.984	50.489		25.139	11.196	10.034	36.441	7.499		20.703	6.866	30.103	31.899	6.654
	75.522	16.689	7.288	6.443	7.077		8.45	0.951	8.767	8.873	143.122		13.414	21.653	8.556	670.719	0.634		657.727	8.133	3.38	8.767	5.07
	29.786	5.809	7967.72	2.535	7.922		27.04	50.172	16.794	29.575	139.742		29.575	19.963	31.582	5.176	2.324		17.639	6.338	20.386	21.336	112.491
	6.971	10.246	108.16	29.997	0.739		10.879	9.823	11.091	31.582	65.065		37.708	27.251	27.885	315.924	13.731		27.146	79.324	45.208	6.126	2022.93
	21.442	1.162	69.396	15.104	9.189		29.364	3.169	5.598	36.863	29.681		59.361	16.478	39.609	10.668	20.386		7.922	4.119	44.151	29.258	141.432
	18.801	10.246	32.004	28.308	2.429		237.868	7.711	60.946	49.644	180.302		393.136	31.476	41.722	764.514	645.263		127.806	0.739	761.239	15.844	313.918
	9.295	32.744	23.026	3.38	33.061		35.384	4.647	2.852	48.799	6.866		3.274	5.387	18.59	246.212	4.436		245.261	115.659	42.567	209.771	6.126
	4.859	1.796	5.493	4.014	8.767		333.564	4.859	23.554	63.164	2.746		79.324	19.858	139.002	10.246	8.027		28.413	347.189	242.515	0.845	0.211
	31.371	42.144	9.506	4.542	4.014		9.823	9.929	12.781	7.605	28.096		111.118	3.591	28.941	16.9	284.765		18.59	3.169	241.776	35.913	73.832
	9.084	181.041	6.232	85.345	80.169		10.034	7.816	43.623	28.836	8.661		56.404	17.745	6.232	29.153	40.243		108.371	28.941	5.598	10.351	2.429
	21.864	4.542	49.961	16.161	560.341		59.044	4.542	1237.71	7.288	2.007		33.378	51.968	20.808	23.766	36.229		54.925	148.298	3.697	17.534	110.484
	2.007	1.584	87.563	13.203	34.434		9.612	77.74	149.037	51.545	3.697		13.837	4.542	80.803	17.534	5.493		9.929	12.569	38.342	174.915	53.341
	9.823	11.936	1.901	57.566	48.165		21.336	44.257	203.117	6.126	1.268		1.268	11.196	9.084	31.159	2.746		226.143	35.701	72.459	93.901	21.759
	20.491	11.619	9.929	83.021	25.456		6.126	27.568	77.634	34.223	8.556		0.739	9.612	12.992	43.095	36.863		71.086	11.619	389.017	11.619	29.575
	1.162	342.014	3023.83	14.365	10.457			44.363	7.183	29.997	1.056		12.569	7.288	11.513	21.547	5.704		16.372	7.922	212.94	7.499	5.07
	46.158	740.643	35.384	166.571	17.851			23.026	254.662	1.268	4.753		70.452	46.898	93.689	9.401	23.449		17.217	10.246	78.163	43.306	10.879
	18.59	1.796	11.513	100.661	15.104			44.679	324.374	45.208	218.433		80.064	27.991	1.268	1.479	714.553		91.26	41.616	36.546	26.406	448.484
	116.61	0.634	10.668	12.675	27.357			56.087	2172.6	764.197	55.559		17.428	7.288	5.704	5.387	4.647		19.118	14.048	223.819	24.399	25.033
	27.146	82.282	94.006	84.078	4.331			132.982	20.491	249.381	4.964		247.162	6.126	17.323	90.943	12.147		29.153	51.651	88.408	10.457	13.414
	62.53	82.81	81.12	26.089	21.125			195.406	327.121	5.704	148.298		26.406	9.401	122.842	19.329	15.421		5.387	11.619	936.577	7.711	49.644
	1.479	63.164	34.962	79.958	24.822			19.858	5.07	34.223	324.374		27.463	38.131	83.866	17.745	6.654		164.458	49.644	57.988	151.678	53.763
	4.542	16.478	139.214	21.864	6.971			20.808	90.098	704.202	1.056		3.803	17.323	6.76	3.169	164.247		58.411	53.341	102.245	5.809	239.98
	8.767	5.281	10.668	2.113	15.633			10.14	1085.19	391.869	16.161		184.527	8.027	32.849	52.707	9.506		81.754	1085.61	97.069	23.554	5.07
	13.837	67.6	11.408	62.53	0.528			120.096	1339.22	14.365	1.373		1059.31	2.641	127.067	1.479	10.034		81.543	58.728	33.906	10.457	5.281
	32.427	40.771	35.279	96.013	2448.92			8.978	276.421	21.97	5.176		29.153	33.694	1.162	20.174	8.45		5.07	100.238	1.056	151.255	38.659
	98.231	36.863	8.133	11.091	20.914			1.901	94.112	2.746	35.596		1.268	2.746	37.919	1017.06	1.796		453.976	662.374	298.074	129.708	13.943
	3.591	2.641	2.007	10.985	0.739			55.031	244.839	1.162	34.328		29.786	103.829	97.281	11.83	33.378		566.784	22.604	82.704	80.486	20.808
	3.697	0.845	45.102	18.168	4.014			21.547	245.05	32.004	36.229		11.196	13.626	115.554	3.063	9.189		6.866	18.273	130.236	143.439	19.541
	589.81	38.236	13.203	24.188	15.316			17.217	210.828	4.331	71.825		18.59	88.831	99.921	18.696	44.891		57.143	15.844	69.924	15.21	1.268
	887.567	20.386	4.331	4.119	21.125			3.591	376.342	85.345	11.091		222.446	42.461	67.706	14.576	9.718		107.209	10.246	132.137	5.809	5.704
	50.172	29.364	11.619	0.317	17.428			6.654	71.508	191.604	58.728		13.309	14.471	13.098	56.087	17.111		312.544	46.475	4.753	6.866	5.281
	42.039	29.892	163.93	9.189	19.012			5.281	10.562	17.006	51.756		210.088	29.575	173.964	2.746	197.836		2.958	5.704	12.675	4.225	5.281
	27.04	194.033	28.836	616.428	99.816			9.612	100.133	4.542	5.176		5.387	2.007	69.184	5.598	36.018		28.413	10.774	36.969	4.964	0.423
	8.344	18.062	11.936	10.668	40.032			32.955	55.136	228.044	20.808		21.547	4.753	38.447	3.274	23.132		274.519	29.681	3.169	27.04	10.457
	5.07	145.974	4.542	6.021	5.281			6.338	423.768	229.629	53.446		15.421	28.096	34.645	66.649	450.913		21.97	32.427	218.855	28.519	24.822
	33.061	6.654	24.928	11.513	20.914			7.816	123.37	263.64	5.176		27.991	28.096	40.138	11.619	2.429		88.936	4.542	9.295	50.806	10.351
	345.922	11.619	81.648	7.077	1.479			99.604	34.962	245.895	3.38		0.845	7.288	3.486	15.633	52.284		138.686	10.14	3.486	87.563	1009.46
	3973.4	10.879	19.541	4.014	30.631			32.955	72.248	678.113			98.865	0.106	0.423	50.172	32.533		98.971	3.169	17.217	2.113	15.316
	12.886	76.789	13.731	6015.34	22.181			194.878	86.19	86.824			3.591	44.151	1777.67	5.915	39.926		30.948	50.806	23.238	82.599	967.736
	17.745	9.929	40.349	46.581	18668.7			455.878	37.708	10.034			24.399	166.571	890.524	2.852	17.217		4.647	12.886	27.885	141.749	1293.8
	34.645	411.515	1.584	18.59	1.796			6.126	27.674	59.15			24.399	587.592	4.542	1.584	45.947		14.787	2.113	1184.37	84.5	17.217
	39.293	34.751	20.703	11.091	2.007			4.225	89.148	80.169			16.161	14.048	76.05	14.048	3.274		23.66	226.883	5.387	160.444	169
	224.453	8.873	608.189	107.632	4.753			0.634	17.534	35.596			13.203	35.279	32.11	72.881	0.845		47.848	7.605	7.816	48.693	236.706
	8.873	21.019	8.239	15.633	228.044			18.273	18.273	19.435			14.259	32.955	47.32	112.702	0.845		10.879	279.589	10.562	165.198	245.156
	4.436	18.062	6.866	124.109	6.232			23.238	40.138	14.154			25.35	46.053	166.254	103.301	14.787		5.176	44.996	111.012	158.86	61.579
	1.268	38.342	183.576	20.703	10.985			8.027	103.724	10.246			0.634	33.8	65.91	23.977	7.816		10.246	7.288	6.549	15.104	48.059
	0.634	23.977	116.504	52.073	41.194			1.373	125.166	20.28			70.874	9.718	6.443	27.251	53.341		64.431	8.978	1.796	20.491	39.821
	5931.9	34.223	26.723	38.342	1801.75			6.126	127.489	161.606			0.634	53.657	7.288	15.527	2.324		14.682	13.626	6.549	15.104	2.852
	187.167	28.413	24.399	46.053	59.784			68.868	8.133	12.253			184.949	71.508	2.429	12.781	1.373		62.002	1.69	24.399	4.859	23.554
	3.063	17.217	38.87	113.864	18.801			421.233	38.976	5.387			33.378	69.924	20.808	5.493	0.845		240.508	611.886	9.823	2.958	88.091
	0.528	26.406	11.196	19.012	11.196			25.139	11.196	31.582			2.746	71.191	885.032	15.316	90.309		20.703	3.591	41.828	164.564	17.745
	10.879	0.528	170.373	13446.7	9.084			24.294	55.453	26.089			47.214	313.812	60.946	35.596	13.52		194.773	15.104	109.85	21.336	28.941
	13.309	14.259	185.689	26.406	30.948			0.317	12.675	9.189			0.739	500.346	400.847	12.569	33.483		611.886	7.394	13.731	4.753	12.886
	33.483	4.225	35.913	16.266	1.796			2633.13	9.718	196.04			98.865	58.833	84.5	17.111	6.126		200.582	16.794	23.132	218.538	2.007
	16.055	38.976	19.118	6.76	3.486			9.295	6.549	454.821			59.784	26.512	94.323	25.033	4.542		15.844	2026.94	6.338	23.449	40.454
	53.024	13.731	9.612	5.598	16.478			5.493	15.316	6.971			151.466	12.147	31.793	11.408	13.414		12.358	6.338	9.401	3.591	940.062
	1.69	11730.5	158.015	8.556	39.293			741.382	38.764	5.598			0.634	9.295	168.894	580.304	14.999		2.746	21.97	5.176	142.066	389.228
	3.486	7.922	26.089	9.295	31.582			5.598	14.787	13.203			74.782	71.297	87.141	2.324	21.336		6.549	28.624	8.344	6.549	15.316
	21.759	15.21	81.754	5.598	9.929			39.293	12.041	6.443			11.83	12.464	16.055	38.131	1.584		10.562	11.724	60.101	6.443	20.069
	106.998	86.612	0.845	14.999	1.796			22.498	3.274	11.936			8.027	11.196	39.821	1.796	7.394		3635.93	33.694	53.552	11.513	3.697
	101.4	25.244	2.746	6.338	3.591			31.265	37.286	136.256			3.697	0.951	10.351	15.949	24.399		583.367	31.054	39.821	15.738	45.313
	5.07	7.816	537.42	19.541	20.069			17.956	14.999	28.202			7.816	48.059	1.162	94.746	275.998		3621.25	27.674	6.971	65.804	42.356
	44.679	49.432	19.858	6.338	8.133			3.063	19.646	44.046			76.05	11.091	4.014	95.485	13.731		25.773	281.385	14.471	27.251	39.081
	0.423	20.386	95.485	7.605	256.774			1.162	203.434	19.329			58.833	2.641	12.041	2086.2	409.297		52.073	2.746	65.487	3.063	161.501
	10.246	17.111	2.641	48.376	144.812			2.641	39.609	18.696			40.771	16.794	42.144	18.484	27.568		30.209	27.568	5.387	377.398	188.224
	40.666	2.958	82.493	19.963	160.022			0.845	0.951	4.014			26.618	201.533	9.295	100.449	9.401		9.506	154.001	237.762	444.364	207.764
	8.978	186.745	4.225	4.225	1.901			4.964	52.812	25.773			22.498	4.542	31.688	273.463	9.718		2.958	571.537	11.83	25.139	43.095
	6.76	15.421	122.948	1.796	4.331			6.021	19.963	112.174			3.908	3.697	8.45	115.026	14.365		9.295	14.787	13.52	19.012	151.466
	2.113	24.716	13.52	4.331	16.266			0.739	8.767	147.03			1.056	119.145	20.069	75.205	2.429		342.753	1.373	34.539	262.478	26.195
	6.338	29.258	8.556	20.386	3.697			170.373	113.758	41.511			12.781	1.901	2.429	233.431	2.535		5.387	0.845	245.473	68.656	37.814
	19.646	3.169	15.527	6.126	24.822			10.879	22.709	49.855			153.896	7.605	29.047	2408.46	2.535		4.753	2312.98	488.621	69.29	10.879
	147.03	68.445	311.805	31.688	99.393			16.794	214.841	42.144			12.675	22.181	4.964	151.572	0.634		28.73	1227.57	11.196	18.907	21.547
	33.906	19.012	5.281	26.934	28.308			18.801	151.572	294.483			43.201	117.561	5.809	3.38	2.007		5.07	11.83	1.479	6.654	2413.85
	51.545	257.514	1.796	37.391	26.406			3.063	13.309	5.07			45.947	32.955	1.796	2.429	4.647		8.45	18.062	4.436	6.76	29.364
	46.581	89.887	194.35	10.457	27.463			11.724	11.302	507.634			39.609	11.619	8.661	50.066	80.909		100.766	6.654	194.878	11.83	18.696
	109.956	25.35	66.332	9.718	6.971			2.429	19.012	37.074			31.159	2.429	27.357	7.183	11.619		9.929	4.964	12.886	2.852	14.682
	36.441	11.513	7.077	101.717	47.32			4.331	10.034	362.399			106.998	31.054	126.328	1377.46	20.28		12.464	5.493	5.176	1.584	6.232
	110.378	4.647	97.175	10.879	1.69			105.731	16.372	45.208			891.158	331.24	3.697	41.194	8.239		6.443	7.077	194.033	4.753	2.958
	54.397	9.189	100.978	122.525	397.995			0.423	430.211	468.658			61.051	14.576	12.464	12.147	170.373		55.559	6.443	208.926	15.421	39.504
	24.188	8.133	209.877	164.036	86.401			0.845	15.316	298.919			36.652	17.534	13.943	208.926	20.491		30.526	2.641	1.162	32.955	9.823
	11.513	2.641	29.786	105.519	127.278			5.598	0.634	2.324			50.278	37.814	3.169	14.048	70.874		914.607	2.429	7.288	38.553	82.388
	5.598	4.331	15.633	2.958	4.753			24.083	4.964	246.423			1201.17	1544.87	286.138	18.696	53.024		71.719	32.11	11.196	36.863	22.498
	7.605	23.343	277.054	7.605	32.216			75.944	15.316	10.774			3442.53	16.478	127.806	34.539	144.918		19.646	5.07	5.281	17.006	18.273
	373.807	15.949	92.105	13.943	121.891			3.486	4.753	41.828			194.35	2.429	34.645	26.195	30.526		9.084	5.809	239.346	7.183	74.888
	39.821	0.528	24.822	17.428	2.958			7.077	7.288	26.512			3.063	48.799	11.302	99.816	16.266		41.405	26.512	2.429	8.239	1.69
	51.334	25.561	119.462	8.661	5.387			0.739	1.584	118.089			9.612	5.809	9.929	84.606	20.914		64.114	93.373	16.161	34.962	126.961
	185.9	167.627	851.76	8.239	144.284			0.528	87.774	9.929			2.535	47.848	73.515	56.509	614.949		7.922	44.891	22.604	18.273	7.816
	51.439	9.929	62.953	17.639	7.499			3.591	8.767	19.752			46.581	68.656	3.38	116.927	51.228		78.374	73.198	0.423	8.344	7.816
	128.546	1.901	22.498	4.119	2.324			11.091	5.704	5.387			38.236	15.949	107.632	155.797	38.025		25.878	4.119	2.852	2.641	35.173
	131.081	11.091	739.481	22.604	1.162			65.699	23.132	513.549			5.281	14.365	31.582	91.154	60.946		71.086	1020.44	14.999	15.21	6.76
	8.344	5.809	78.479	72.67	10.457			19.224	5.493	45.102			61.263	16.794	26.406	125.166	67.389		7.605	380.039	51.228	13.098	0.951
	9.929	23.766	34.223	55.876	207.448			8.027	19.646	27.674			51.017	22.604	10.034	519.886	34.962		8.978	810.566	13.414	22.815	9.929
	8.344	5.493	2.535	11.408	25.878			2.641	19.224	102.984			30.42	8.027	3.169	60.101	20.386		45.102	446.477	3.486	11.408	67.811
	1.056	1.162	12.569	42.884	101.083			8.767	14.154	16.9			10.985	74.254	7.711	16.478	122.103		14.787	15.21	62.213	37.286	7.922
	3.063	1728.13	10.879	6.338	1.056				385.426	24.716			12.781	34.011	10.246	195.512	196.991		11.196	56.404	16.689	11.936	17.745
	2.535	91.26	13.731	42.461	24.188				192.554	19.329			5047.29	30.948	99.393	198.364	451.23		4893.08	35.701	6.76	5.704	17.111
	545.131	1.584	4.753	782.364	5.387				32.321	15.316			59.784	4.331	1359.92	25.878	6.76		34.011	156.748	975.236	8.556	117.772
	64.959	1.901	10.774	9.506	2.958				49.432	30.209			20.491	12.675	253.606	21.547	1.162		11.619	7.711	5.281	4.225	19.224
	35.173	104.569	23.554	1.479	10.14				5.915	15.633			1906.85	329.55	115.026	29.997	2.958		13.414	7.288	46.792	2839.41	4.753
	39.609	6.443	23.026	13.098	1.162				2.535	12.147			358.808	25.244	15.316	31.793	154.741		19.963	9.929	18.062	5387.51	502.247
	435.281	4.542	71.614	91.894	20.703				1127.65	152.206			1.584	3.486	25.667	55.559	172.697		13.098	124.849	4.225	54.608	73.726
	5.387	17.639	16.9	2.113	10.879				269.344	16.689			2.746	1.373	10.985	14.048	36.229		44.257	18.484	9.189	0.951	49.221
	35.384	10.668	84.606	16.689	87.246				15.316	5.915			7.816	47.743	2.535	47.848	1.584		10.14	36.863	44.046	32.955	41.194
	434.647	23.554	348.457	8.344	10.562					5.598			2.324	38.447	26.723	18.484	15.633		1924.59	203.539	22.604	5.281	16.161
	297.123	7.183	5.915	6.338	5.176					12.041			1.69	9.084	61.896	11.619	27.251		2.958	24.928	0.951	23.449	2.429
	101.506	1.479	4.331	7.394	294.694					1131.56			5.387	4.753	36.229	10.351	9.401		86.19	69.079	77.74	12.886	18.59
	31.054	0.739	8.767	13.309	52.812								10.14	14.048	36.229	5.493	12.992		17.639	49.221	61.368	19.329	263.957
	43.095	1.479	9.823	16.055	53.024								22.076	24.822	4.964	40.454	1.69		12.041	369.265	25.35	27.885	56.932
	10.246	3.38	13.52	1.901	48.059								1.162	8.239	6.866	1.796	84.817		342.225	29.997	48.165	1.901	18.696
	36.441	7.499	16.372	48.059	528.442								36.758	5.704	27.251	22.815	27.674		31.265	138.263	84.817	3.697	11.724
	19.224	4.225	2.641	159.916	55.031								19.541	2.746	9.929	13.414	314.868		39.715	79.113	2422.3	1.69	12.464
	38.342	11.936	2.007	659.734	32.638								23.66	1.69	20.069	38.87	42.25		3.063	17.111	44.151	4.542	19.752
	103.724	1.69	7.922	70.029	45.524								23.554	35.068	1.901	27.04	29.469		33.166	96.436	2.535	22.498	10.562
	146.608	3.803	4.119	3349.37	1.69								68.868	13.414	52.179	58.622	36.546		31.582	54.291	15.844	52.073	414.05
	107.209	0.739	26.089	44.891	37.497								12.358	52.284	13.098	89.887	58.305		90.204	168.049	25.878	40.877	8.767
	55.242	17.323	23.66	731.453	18.907								3.697	3.697	4.436	45.947	0.634		45.419	96.858	167.416	2.746	28.413
	12.781	5.915	175.443	76.684	13.203								41.511	6.654	27.568	16.689	0.951		58.833	105.836	138.157	72.248	30.42
	47.109	45.208	8.873	63.903	20.808								6.126	6.76	29.681	66.438	10.668		2.218	21.547	1.584	0.739	9.295
	2138.17	9.401	0.845	126.856	870.456								115.659	1.584	17.217	14.365	1.584		6.232	39.609	1.056	9.506	156.959
	58.199	0.317	109.533	13.837	7.183								50.806	4140.08	78.902	6.971	4.647		2.218	42.989	166.465	20.597	1.796
	269.766	0.951	815.425	7.922	12.147								95.802	25.878	7.183	10.985	8.767		5.176	2.746	121.891	21.019	2.746
	29.258	2.535	96.647	14.365	23.977								22.076	4.119	68.551	2.535	378.877		4.542	674.416	0.845	37.286	210.299
	38.342	2.852	57.566	16.266	32.955								97.703	10.985	402.748	34.328	59.256		20.491	128.651	9.718	26.618	6.232
	635.546	0.845	228.15	4.859	12.041								6.338	20.808	214.736	5.598	52.284		518.091	3.169	185.372	2.429	7.605
	468.553	0.528	28.308	62.424	16.266								1.584	7.288	241.248	26.512	1271.51		0.739	6.549	48.482	5.809	39.504
	8.45	1.373	9.929	6.443	187.379								90.732	7.711	318.354	27.251	8.556		159.388	3.486	246.423	12.253	23.449
	9.929	28.308	2.218	27.251	14.787								2.535	2.641	276.843	9.189	1084.56		81.543	184.633	376.447	34.011	32.216
	14.365	4.964	73.515	19.118	164.141								42.461	1025.62	256.458	46.158	4.119		12.992	26.512	303.461	3.38	11.936
	68.445	1.901	1.373	8.556	6.866								0.634	4.331	29.997	105.519	60.523		2.746	5.387	16.583	27.463	95.696
	15.527	4.119	1.056	12.886	21.019								4.014	11.408	11.302	168.155	118.406		50.278	19.646	31.265	729.763	82.599
	22.181	51.439	0.634	9.718	3.486								61.579	51.651	3.591	7.183	6.126		15.527	47.426	20.386	22.815	4.436
	13.098	119.568	1.796	3.063	104.463								2.218	841.726	66.438	2.007	27.885		95.274	4.859	21.547	923.268	25.139
	2.429	2.746	15.844	18.379	59.044								77.74	26.723	43.306	401.798	28.519		67.072	30.42	33.166	2258.05	56.721
	5.07	41.828	6.76	6.76	3.591								61.157	9.929	91.577	662.058	6.021		7.077	49.116	762.084	230.474	8.556
	8.873	5329.31	113.969	3.063	12.675								43.729	9.084	31.371	364.934	1.584		1.373	6.443	45.208	66.861	261.316
	20.491	0.634	44.363	1275.53	17.745								7.077	145.974	10.562	14.048	4200.71		1.373	4.331	75.522	37.814	1583.42
	10.985	5.493	334.62	4.647	0.951								48.799	115.765	90.521	598.577	26.195		106.048	36.335	36.758	36.335	4074.59
	31.371	5.387	34.856	202.589	11.936								3.274	91.999	3.697	26.512	1574.02		346.344	27.779	443.519	156.325	889.151
	133.299	4.119	196.463	177.133	30.526								2.535	14.787	3.908	15.421	42.25		17.851	1.056	480.594	953.899	96.33
	15.316	23.871	25.984	43.412	537.737								12.675	174.704	36.758	16.266	20.28		2.007	71.614	31.793	85.873	701.561
	42.25	37.814	82.176	195.089	11.302								5.176	816.587	222.446	27.779	835.177		5.176	33.272	379.616	20.703	182.098
	47.32	853.767	383.419	22.815	101.611								21.97	597.837	8.661	31.159	673.571		2.641	192.554	78.479	9.295	21.231
	62.847	105.097	25.456	16.9	402.959								14.893	13.731	9.084	21.336	257.514		1842.21	4.964	0.423	12.464	4.859
	79.219	16.055	78.585	16.689	5.281								25.244	691.104	21.97	80.909	24.822		16.266	23.449	0.423	5.598	185.055
	26.195	629.631	47.109	431.689	5.598								11.408	8415.67	116.821	45.313	11.408		782.048	17.006	6.549	161.923	131.186
	8.767	487.143		34.962	5.387								29.892	1.056	47.426	0.845	5.915		1044.21	249.275	55.981	78.268	30.103
	18.696	9.401		52.284	160.127								11.408	7.288	7.183	48.904	34.962		1061.85	1204.76	4.859	30.42	211.356
	13.098	161.923		9.401	7.394								29.681	199.209	871.301	23.871	54.714		1079.7	37.919	130.658	261.739	277.16
	9.401	174.281		6.654	14.787								28.202	24.399	81.014	168.894	7.394		737.896	6.232	13.626	130.236	287.406
	32.216	107.209		0.211	4.647								25.773	85.134	67.6	54.291	2.641		246.951	5.07	2.852	13.414	809.404
	10.457	15.844		41.088	10.034								54.503	51.651	12.781	22.709	22.498		20.386	17.639	31.582	6.866	250.437
	29.786	18.168		11.302	16.055								23.343	9.929	322.156	2.429	171.218		2.007	27.674	364.829	7.288	21.442
	12.147	0.845		20.703	13.203								101.928	1.268	20.597	13.837	4.964		8.978	17.851	21.019	16.266	2078.17
	13.837	16.478		279.061	19.646								13.203	5.07	6.76	17.745	13.52		77.74	28.73	2.007	6.866	5.387
	5.915	558.968		4.542	12.781								27.463	38.236		19.224	0.845		2.218	279.695	38.976	26.723	73.304
	6.021	1102.09		20.914	4.647								43.095	5.598		90.309	3.803		0.317	8.344	6.443	83.233	6.549
	5.809	35.279		10.351	1.479								1127.65	13.414		99.076	63.164		139.636	515.661	16.478	8.978	411.938
	432.323	17.006		2.535	17.639								20.703	8.661		88.619	47.109		4.436	8.344	8.978	25.456	32.955
	15.738	1.796		5.07	20.808								8.133	16.055		2.113	2.641		168.155	82.071	181.358	26.934	397.572
	158.966	14.154		5.07	16.372								164.775	1.056		8.344	4.014		1.056	27.357	51.439	1.373	686.246
	1403.12	31.793		30.103	4.436								1483.08	4.753		4.119	13.731		96.752	391.024	250.437	18.801	357.012
	38.976	45.947		18.273	6.021								132.454	7.605		17.745	10.985		32.004	6.549	21.231	16.055	213.151
	3.274	34.856		372.328	57.988								2910.39	56.615		3.274	5.809		58.305	2.746	38.553	28.519	429.788
	36.335	29.364		7.816	34.962								1211.73	4.964		99.921	65.487		36.546	4.964	28.308	29.258	1839.67
	10.879	93.373		4.331	12.675								182.626	14.365		108.054	10.351		290.574	22.076	5.176	43.94	22.287
	11.513	4.964		47.954	2.746								38.447	127.806		34.223	298.074		250.12	27.779	10.351	66.966	7.077
	124.638	3.169		2.746	8.873								19.329	34.223		120.096	131.398		117.455	9.084	54.714	13.837	4.647
	110.484	6.866		4.859	3.274								6.866	4.859		71.297	36.758		179.034	236.389	2.324	9.718	12.992
	26.406	13.098		10.351	46.792								4.859	14.048		21.547	1.479		333.669	1787.17	0.951	3.908	0.951
	92.95	14.154		74.994	143.544								20.491	11.196		99.604	4.331		155.48	15.738	367.998	10.246	14.893
	1070.93	3.591		26.829	52.284								15.844	15.738		36.124	2.746		789.864	10.351	176.605	18.907	1.373
	12962.4	582.311		476.791	246.212								17.745	5.598		0.634	0.634		5055.85	131.82	13.837	29.575	12.886
	33.378	0.951		40.243	84.078								35.596	0.739		0.423	0.423		95.802	32.427	31.159	56.721	31.159
	22.393	12.675		15.316	72.248								4.225	11.091		2.852	0.951		1037.98	7.922	46.369	8.133	59.678
	28.308	15.527		7.605	39.398								25.878	65.91		4.225	6.021		14.893	0.739	13.52	6.866	7.605
	9.929	5.387		772.013	129.708								27.885	40.56		4.225	7.077		35.701	94.534	8.344	2.746	115.131
	12.781	100.766		288.145	27.568								1.901	19.435		6.126	40.771		29.681	38.236	23.238	2.218	92.211
	40.138	31.899		17.851	2.218								3.38	10.879		7.711	80.909		6.549	4.964	23.766	2.113	118.089
	214.947	2.535		16.266	27.991								49.221	1.268		95.802	13.203		25.667	72.142	6.76	4.014	42.356
	175.338	17.428		976.186	5.598								5.809	4.225		8.027	9.189		13.52	17.428	0.951	3.591	661.107
	42.884	230.685		89.253	80.698								12.253	5.598		4.331	10.034		9.189	21.547	9.084	3.274	74.782
	52.39	35.068		63.269	10.774								58.094	0.528		43.623	9.718		9.718	43.412	48.059	41.299	48.376
	38.025	6.443		12.464	11.724								27.885	0.528		11.619	5.176		1.69	5.915	5.704	7.922	117.983
	31.688	33.8		22.393	35.068								23.871	29.153		13.52	17.956		19.963	12.569	5.387	1.796	236.811
	19.435	38.236		2.746	17.006								6.971	8.027		4.753	50.489		2.007	0.845	6.126	28.202	107.737
	226.249	4.436		163.93	3.274								7.922	55.876		87.563	1.69		18.273	2.958	3.591	2.113	11.196
	9.401	74.888		21.864	23.343								6.76	2.429		27.885	0.528		4.859	5.281	8.767	143.439	15.527
	7.183	55.981		4.964	5.281								8.978	19.858		107.949	54.714		42.039	1.056	484.713	13.731	35.49
	34.539	29.364		13.731	46.581								9.189	6.654		422.923	7.394		4.647	2.746	167.944	6.021	13.943
	51.862	25.456		644.841	81.12								21.759	3.803		74.994	50.066		40.138	4.436	51.862	1.69	115.026
	23.238	15.21		3.591	5.176								17.428	4.859		129.602	14.787		361.026	0.951	33.378	28.941	254.239
	1.268	0.634		2.218	4.647								51.756	4.014		1.162	1.373		498.656	13.414	40.771	17.851	39.293
	10.985	30.526		371.378	8.45								9.295	8.45		46.053	17.428		190.548	0.739	7.394	2.007	89.781
	26.512	148.72		0.528	33.483								10.351	118.828		1.584	3.38		76.261	24.188	10.668	19.329	6.443
	7.711	47.531		4.014	30.526								25.561	1317.57		47.954	2.218		80.064	6.021	3.38	1.796	318.565
	135.728	1.901		14.576	24.294								6.232	1618.49		3.063	25.456		153.262	29.786	29.258	8.027	235.121
	48.059	10.14		3.803	16.161								17.851	108.054		2.746	17.111		386.588	27.885	32.638	1.69	10.457
	13.098	25.139		6.021	15.949								43.412	101.189		17.217	10.034		476.158	4.647	7.077	6.971	7.711
	7.499	7.816		24.611	6.971								468.341	14.154		7.711	52.39		218.433	27.251	3.803	3.803	18.484
	94.218	965.729		4.964	85.873								42.673	234.91		25.139	2.113		9.929	18.062	492.952	99.71	21.231
	188.435	184.949		73.621	198.469								186.639	19.224		32.004	2.113		72.776	4.331	486.298	48.376	188.224
	10.457	186.745		31.159	102.245								554.214	120.307		16.794	32.427		37.497	5.387	25.139	79.324	135.939
	8.45	3.591		67.389	192.766								6.232	183.154		34.011	31.793		11.196	130.553	8.556	10.034	7.183
	24.294	513.549		48.693	1.901								15.844	829.368		19.963	0.423		10.774	37.708	315.291	29.892	10.457
	1.479	1538.74		11.83	7.605								199.209	3.908		118.406	1.479		46.264	4.964	6.549	7.077	10.562
	67.494	20.28		92.528	3.803								163.508	407.29		48.165	2.852		27.251	10.351	1395.41	2.007	15.949
	71.508	28.836		45.841	33.589								704.624	42.356		261.633	0.528		33.166	29.364	59.361	5.176	15.316
	213.891	14.365		86.084	7.816								58.833	22.815		138.052	21.653		5.281	3.38	5.176	28.73	4.119
	5.176	5.07		4.647	34.328								16.266	11.619		20.28	7.499		5.598	171.746	12.886	18.907	155.586
	2.958	76.473		174.704	83.972								49.221	40.138		74.888	3.274		46.792	3.063	72.459	4.331	451.969
	9.929	25.878		77.318	54.186								6.654	48.904		30.843	0.739		124.954	231.53	6.654	1.584	4.119
	32.533	16.266		83.444	492.001								108.371	56.509		22.181	20.069		12.781	2.535	7.922	81.331	14.576
	11.619	95.379		5.281	5.176								9.929	2.852		1.268	6.654		47.954	43.201	114.603	42.989	107.949
	26.301	2.218		1.901	15.421								2.746	21.019		36.229	1.901		2.958	2.852	1.69	11.724	154.424
	110.378	3.486		10.668	5.704								2.429	2.429		146.291	3.274		2.324	4.225	74.782	27.568	240.931
	209.032	33.906		2.324	25.244								120.835	43.518		118.406	122.314		7.288	3.591	31.899	50.806	1.268
	108.16	0.951		100.344	58.199								0.739	76.684		143.967	13.309		227.939	108.054	85.028	4.331	5.387
	0.211	10.774		27.779	23.766								2.641	41.405		4.331	1.373		5.493	8.873	2.429	9.823	27.885
	51.862	25.35		31.054	381.834								29.364	689.309		5.598	20.703		16.9	34.328	7.816	41.933	7.288
	28.836	0.845		31.371	43.306								30.209	223.608		3.697	8.978		163.085	6.654	10.668	4.119	2.746
	27.04	2.958		9.929	159.071								2.852	381.729		53.763	2.852		18.696	80.169	14.787	3.274	115.659
	12.147	15.949		10.879	9.189								6.549	4772.35		437.71	5.176		89.781	40.454	4.436	6.866	26.089
	108.899	8.556		5.915	9.823								1.056	714.131		191.815	7.288		94.006	89.464	6.654	5.493	20.597
	21.442	64.748		31.371	279.906								3.063	1802.91		27.04	14.365		16.055	17.428	34.539	7.711	109.744
	6.232	10.985		11.196	82.704								3.697	463.588		21.547	3.063		656.248	8.239	492.318	24.505	157.276
	447.216	30.209		15.738	12.781								0.845	35.173		163.719	25.667		48.376	4.753	4.753	15.527	16.372
	89.148	18.273		5.809	16.794								25.667	90.204		8.661	1.373		31.054	6.443	2.852	13.837	6.338
	40.771	11.724		5.176	49.432								233.009	196.357		12.886	13.203		6.549	10.351	4.119	11.619	29.681
	25.561	160.339		9.823	5.07								235.333	28.202		66.649	6.76		26.723	9.612	235.121	4.964	9.929
	137.629	121.046		6.549	18.696								319.516	135.834		107.843	10.985		5.704	159.282	11.302	14.259	377.609
	179.774	8.978		9.401	5.493								134.038	1.268		72.987	23.66		8.133	2.641	53.024	99.921	29.892
	9.718	4.119		7.077	4.436								299.975	8.133		5.07	57.883		2.641	4.119	44.996	82.071	5.809
	7.922	110.906		1.162	7.077								220.756	3.697		14.365	70.241		66.227	1.901	76.05	0.634	83.866
	1.162	7.605		6.549	8.661								720.257	4.119		9.506	21.547		32.638	82.176	270.083	23.343	175.443
	13.731	2.218		1.162	3.908								5.176	3.803		12.886	74.149		89.781	2037.4	49.749	36.441	193.928
	223.186	7.183		19.963	384.897								91.894	379.722		111.118	169.528		13.52	544.497	23.766	5.493	39.609
	53.974	0.845		9.506	3.486								1969.8	19.752		217.165	310.96		5.809	31.371	26.301	24.928	149.143
	27.991	8.873		26.195	18.168								26.618	0.951		208.715	361.132		5.704	89.993	4.225	67.178	16.055
	8.978	1.69		74.888	72.036								21.653	176.922		190.864	177.661		29.364	102.984	81.331	18.168	1.796
	26.829	0.211		904.256	173.859								25.033	29.047		15.421	192.66		14.154	236.706	50.383	3.697	13.414
	27.251	11.83		10.985	1.901								1.796	1018.75		8.978	2.746		1.796	4.859	26.618	8.133	41.088
	97.281	169.528		15.738	8.45								177.028	6.549		60.312	11.408		8.027	627.413	4.647	1.162	97.492
	27.885	1325.07		5.281	19.012								30.948	9.718		108.688	66.438		4.859	9.929	14.259	2.218	357.752
	105.731	9.718		4.331	2.218								398.629	15.316		55.664	680.648		7.499	2.113	2.535	10.457	1.056
	24.294	26.195		1117.2	36.546								25.244	21.336		37.18	150.938		1.901	36.863	3.063	2.324	20.386
	538.265	324.48		22.709	22.921								47.637	20.28		204.701	95.379		6.971	117.033	19.118	7.183	155.269
	10.034	17.956		1.268	3.38								19.224	2.746		11.513	31.371		11.302	153.684	100.766	2685.41	2.641
	7.077	16.266		27.04	71.719								44.257	46.898		19.858	18.907		10.246	46.898	4.119	20.703	52.284
	5.915	31.476		14.787	134.461								25.456	14.048		19.435	38.87		39.293	158.438	5.704	2.429	97.914
	45.208	18.273		959.92	7.499								23.554	6.866		46.369	511.753		32.427	203.645	10.562	0.845	4.331
	489.361	178.189		39.187	9.718								9.612	1.056		143.861	66.649		3.591	473.939	84.394	46.475	1.901
	28.941	37.708		2.958	5.387								396.094	39.926		66.016	68.445		17.111	0.634	49.644	7.077	3.697
	6.971	40.666		82.282	36.124								49.855	11.408		38.447	5.387		39.504	127.384	2.641	21.653	49.221
	85.345	36.863		15.104	8.556								8.556	1.901		14.471	21.231		14.893	5.281	4.859	17.639	4.647
	5.176	624.561		27.779	48.059								2107.64	5.281		15.316	1.373		25.033	17.428	67.917	336.838	718.673
	306.946	73.093		18.062	2.535								16.9	15.527		7.077	0.845		3.908	3.697	108.794	12.675	16.583
	16.9	27.357		3.908	112.913								3.38	6.232		14.048	4.225		155.903	5.809	38.342	40.983	181.041
	69.818	26.406		19.118	6.654								1.584	1166.42		4.436	37.497		58.833	7.711	48.693	8.661	86.296
	45.208	34.434		17.639	270.928								1.69	21.019		6.549	54.291		4.119	149.354	11.091	146.291	611.674
	52.918	4.647		16.9	1.056								1.056	66.966		64.959	30.948		5.598	46.898	0.528	44.363	3.063
	288.673	3.908		36.018	134.249								31.582	11.091		8.873	3.697		37.814	46.686	10.246	60.101	23.132
	176.922	20.069		22.815	10.351								45.102	38.236		120.518	141.221		14.893	7.499	7.183	60.312	41.088
	34.117	8.027		26.934	0.634								5.176	10.351		109.005	12.464		8.027	101.506	141.221	207.131	20.808
	10.774	8.344		57.354	3.063								26.512	0.423		27.357	3.486		41.088	200.582	0.634	131.398	89.042
	137.629	16.161		16.689	31.476								2.641	128.334		4.225	7.605		6.549	965.941	17.745	19.963	1.479
	3.591	7.605		8.556	5.704								3.486	301.771		38.236	4.542		1.584	12.147	282.969	4.436	810.672
	32.849	9.506		68.128	56.404								0.951	17.217		81.014	21.864		45.524	36.863	36.546	36.758	67.494
	155.163	16.794		94.218	261.105								44.891	0.211		10.457	11.091		9.612	154.846	90.204	144.918	117.033
	12.675	2.641		0.634	10.351								30.314	6.971		322.79	1.056		44.679	44.151	6.654	47.32	13.203
	21.864	0.423		4.753	8.767								7.711	5.704		13.414	2.429		18.168	67.494	1523.32	56.721	3.169
	11.302	1.479		322.368	11.724								5.281	6.443		11.196	1.69		13.943	46.475	146.924	55.981	249.064
	16.372	1.69		2.852	177.344								5.07	30.843		7.077	70.452		26.089	31.371	427.781	66.121	20.069
	123.793	211.356		48.587	10.879								3.169	4.964		4.753	7.288		2.324	17.006	39.504	38.764	25.456
	7.922	6.654		73.198	2.218								17.111	3.591		10.457	15.421		12.358	49.961	69.396	13.731	8.344
	36.018	105.097		22.709	50.806								18.168	5.915		91.366	4.647		10.246	115.976	96.964	188.435	2.007
	32.216	2.641		13.414	21.97								78.268	37.602		4.647	34.011		2.852	140.164	35.384	94.957	19.329
	72.036	233.748		151.466	274.731								75.733	62.847		14.893	2.113		798.419	19.646	97.175	51.017	44.046
	46.898	3.803		27.568	75.311								34.856	25.984		69.396	339.901		14.576	1027.94	196.885	27.991	26.195
	111.857	1.901		17.006	12.569								36.863	8.978		1.162	62.53		318.565	11.619	3.063	48.376	43.94
	1.056	6.76		7.288	39.398								13.203	1624.72		2.324	7.605		50.278	30.42	104.991	353.421
	3.274	20.808		30.948	178.612								31.688	3.908		2.218	19.858		233.22	9.401	75.416	295.011
	38.553	190.125		6.549	46.686								9.823	8.661		5.387	36.863		23.132	66.861	4.436	3.697
	1.056	113.969		4.014	17.006								791.871	205.652		2.746	3.169		35.596	24.822	24.822	4.542
	2.218	12.569		4.753	2.324								45.419	17.323		19.012	1.479		91.683	4.859	87.352	9.295
	4.542	31.054		12.569	5.704								1412.63	3.169		17.428	49.961		11.196	4.647	7.499	79.219
	684.344	1.056		1.162	12.781								49.221	133.827		39.504	216.637		9.189	4.014	22.604	12.147
	105.731	12.253		14.893	8.873								6.443	41.933		197.624	163.719		124.532	79.219	21.864	158.015
	25.878	210.722		2.958	24.822								857.781	38.976		107.737	15.104		27.251	18.907	16.9	139.319
	91.154	106.893		8.661	4.647								22.181	20.386		4.542	7.499		0.317	79.324	4.542	6.338
	1648.28	189.069		15.527	23.977								1162.72	129.919		0.951	1.373		0.845	740.114	47.32	83.127
	137.207	290.997		47.32	10.562								13.098	4.647		1.796	5.387		2.535	3.591	2.007	60.312
	658.044	4.542		18.59	10.034								27.885	191.076		196.568	6.338		174.809	98.02	0.423	22.181
	98.971	13.943		12.992	14.471								39.081	5.915		32.955	0.634		82.81	77.634	264.696	32.744
	19.118	39.926		113.758	14.471								4.014	1.056		0.951	0.739		4.331	40.666	64.22	10.034
	4.436	358.069		10.034	13.943								28.413	9.612		15.21	1.268		12.253	35.913	13.837	5.176
	9.718	5.598		12.041	7.711								21.547	0.528		150.621	70.874		1.796	1.162	2.324	20.491
	69.924	74.36		2.429	2.218								33.906	4416.71		24.399	185.055		144.178	2.007	7.816	15.844
	25.561	32.004		70.874	116.927								13.309	1.479		1.796	9.506		6.338	77.634	1.584	295.011
	63.903	8.661		17.323	18.168								2.113	3.486		17.956	10.457		442.886	5.704	1.479	168.155
	46.475	0.845		42.461	13.414								2.007	1.056		3.486	58.622		133.51	5.07	72.776	19.963
	62.424	23.449		19.963	9.295								7.499	2.852		5.915	27.251		27.146	12.041	17.639	3.274
	238.713	2.324		93.584	4.647								1.901	98.337		0.528	5.809		36.863	7.499	373.49	14.999
	2.852	0.845		61.263	93.901								109.639	1.901		4.542	4.542		3.274	10.14	187.167	1.69
	7.288	6.971		8.133	93.689								5.915	13.309		48.587	69.501		340.958	5.176	16.689	26.406
	24.928	79.536		9.823	5.07								81.331	7.605		2.746	4.647		47.003	120.941	408.769	30.314
	9.401	9.612		2.535	10.457								13.098	135.728		167.31	6.443		271.351	46.369	42.356	234.488
	15.738	4.542		25.139	30.103								38.553	11.196		48.482	8.767		75.416	30.314	185.478	26.723
	57.566	106.048		7.077	13.098								36.652	26.723		213.891	19.329		271.562	7.499	61.263	31.054
	23.026	3.274		33.272	0.845								19.224	8.978		266.069	96.224		139.531	2.958	27.568	22.287
	16.689	4.225		78.585	6.971								89.359	4.859		43.306	18.59		99.393	21.759	70.874	225.615
	1.796	6.021		12.992	27.463								32.427	2.958		28.202	20.491		53.024	30.209	59.573	5.809
	31.371	11.302		3.908	875.631								16.478	10.351		7.922	1.056		31.793	1.796	20.597	4.331
	5.809	1.373		374.969	71.403								9.189	12.781		4.014	41.933		22.604	239.241	15.421	11.724
	9.084	6.971		2.958	21.97								8.239	39.715		381.412	5.915		2.746	0.634	20.491	2.218
	53.763	9.189		253.078	9.401								12.992	3.38		15.21	144.706		127.278	22.393	31.054	8.239
	6.232	3.697		121.574	7.605								30.526	4.331		67.811	39.926		43.201	44.996		42.989
	1.056	179.562		53.657	8.239								4.119	11.83		150.516	2.007		250.754	10.879		23.026
	10.034	143.333		78.374	8.344								23.449	8.45		27.357	5.493		12.569	24.505		2.218
	1.162	2.746		7.288	13.837								25.878	1.796		32.427	16.266		2.218	5.809		11.196
	1.056	34.011		0.845	32.955								616.428	21.547		6.021	48.059		9.189	16.372		27.885
	8.45	299.658		13.414	2.007								33.483	26.934		6.232	0.528		54.714	7.816		76.367
	79.641	2.535		5.704	5.704								31.159	10.562		102.773	1.162		40.666	4.753		5.387
	123.687	0.634		9.823	111.857								182.626	12.886		46.264	24.716		32.004	13.626		27.885
	33.694	0.634		0.845	307.158								51.756	41.088		69.818	13.837		563.721	2.641		320.466
	5.281	73.515		6.971	108.477								83.338	3.908		18.168	9.189		72.776	62.847		6.338
	62.424	54.925		11.302	6.654								17.851	0.845		28.413	3.486		27.357	11.196		13.309
	14.365	7.394		8.344	93.584								14.576	28.308		67.706	4.331		21.759	25.561		325.325
	25.139	24.611		87.458	95.168								5.493	14.999		107.632	13.098		149.671	55.453		680.542
	19.224	1.479		165.409	15.527								90.415	2.535		8.239	25.667		568.474	278.322		2.429
	38.131	1.373		10.351	52.812								52.179	1.69		1853.51	19.541		2818.5	145.974		25.984
	21.125	4.014		79.008	20.386								1.056	269.766		73.409	29.681		19.858	40.138		129.391
	0.423	1.69		96.541	58.305								9.401	100.978		29.997	47.426		6.232	22.498		0.739
	5.915	0.845		9.929	41.828								5.915	61.896		37.919	19.435		35.49	71.825		3.169
	22.181	1446.01		21.442	11.196								7246.93	135.834		5.281	14.365		5.387	45.102		6.549
	4.331	16.9		41.194	5.281								8708.46	43.729		38.553	8.767		3.169	30.737		25.244
	4.436	1.479		54.608	9.401								4.331	165.831		21.442	18.907		22.604	11.302		19.012
	40.138	1.373		1080.65	9.084								0.423	376.342		70.452	8.978		6.443	24.611		5.281
	6.654	0.211		51.017	23.132								0.739	58.199		25.773	4.859		12.886	16.794		32.216
	1.796	198.998		196.251	8.239								70.874	15.949		5.176	10.774		47.109	8.344		11.513
	3.803	3.063		368.843	9.189								36.652	103.196		10.14	23.238		10.668	273.463		4.119
	48.059	70.558		10.351	7.711								24.188	10.246		22.604	2.852		14.893	1.584		5959.05
	61.157	9.401		10.457	30.843								67.072	28.096		64.642	2.007		7.077	4.647		38.447
	7.711	230.157		9.189	20.914								178.929	4.436		81.754	1.056		127.701	4.014		4.859
	13.098	79.853		7.288	1135.89								565.939	4.753		4.753	1725.17		91.577	14.259		3.908
	6.76	4.331		59.044	98.126								423.028	5.915		8.978	320.783		17.745	0.951		2.535
	21.125	2.746		10.351	5.598								72.036	12.569		34.539	426.831		32.216	566.044		11.408
	5.915	106.47		15.949	7.288								3.274	4.331		26.089	136.362		3.063	27.885		3.38
	85.768	0.739		10.562	2.324								10.351	5.176		28.836	38.447		5.915	7881.84		7.922
	8.45	21.019		4.859	1078.64								55.453	30.631		20.069	40.243		23.766	36.018		7.394
	13.731	15.949		15.421	235.016								19.012	1.901		3.169	301.243		100.766	25.139		14.048
	28.413	224.876		14.048	143.333								2.113	1.479		6.338	1.69		7.288	21.97		26.089
	7.394	183.893		171.113	2703.79								0.423	13.837		56.509	2.641		171.746	15.949		109.639
	15.527	14.259		19.329	83.233								3.063	17.639		13.098	99.604		7.711	3120.9		1.796
	22.604	144.389		8.978	45.419								35.596	0.845		11.302	45.524		11.196	28.836		10.14
	2.746	93.584		7.922	52.601								31.899	16.372		12.041	21.97		13.731	12.358		4.753
	9.189	3.169		3.063									303.355	1.268		0.634	23.449		8.873	34.011		6.76
	5.809	28.096		7.711									127.489	7.816		0.845	3.908		69.501	5.809		34.328
	40.032	1.373		9.189									65.804	3.697		14.471	4.331		46.369	3155.55		8.239
	9.929	72.881		92.422									32.638	22.287		47.531	0.528		577.558	11.724		5.281
	25.35	6.443		64.854									19.012	22.076		25.244	3.169		8.873	22.498		28.73
	7.183	769.795		17.323									61.157	16.055		28.941	1.162		11.196	20.914		16.478
	7.922	72.142		1349.99									1.796	70.241		120.729	25.984		31.476	26.723		18.273
	109.533	10.879		57.671									1.162	42.884		43.201	27.04		247.057	5.915		63.269
	9.295	133.721		21.019									14.682	1.584		9.189	97.069		2038.25	49.749		3.908
	39.398	38.025		9.189									1395.83	92.633		1.479	27.779		4.859	1.373		2.852
	3.486	5.281		3.169									44.257	1.268		4.119	26.512		8.978	2.324		45.102
	3.697	57.777		9.823									233.537	7.499			4584.86		186.851	15.633		2.746
	81.331	49.01		18.273									3.169	49.749			2577.36		37.919	1.69		123.053
	161.712	117.455		41.828									25.561	207.131			4.119		10.351	15.949		8.239
	37.074	202.694		35.807									91.154	5.493			1560.29		16.689	192.343		1.901
	46.053	8.661		20.808									39.609	7.605			4.119		105.203	13.203		57.143
	286.033	0.951		4.119									1.796	496.754			6.232		80.909	24.083		4.436
	524.745	3535.06		1.796									22.604	1.901			101.294		6.232	3.063		4.964
	73.621	6.232		10.562									8.239	23.977			22.498		10.351	3.169		7.288
	13.309	6.971		6.549									329.339	171.852			12.675		41.933	9.718		682.866
	2337.38	2.641		24.294									19.646	9.506			2.958		117.349	23.554		20.174
	129.919	0.951		103.196									20.491	5.915			13.837		129.285	35.807		34.645
	207.87	64.959		165.831									13.52	5.176			1.479		62.53	9.929		40.666
	69.607	1.479		5.704									15.949	11.196			1.584		13.837	10.246		9.506
	381.623	550.94		50.806									38.659	17.006			2.429		36.441	8.239		4.014
	138.263	106.576		3.38									1.162	35.913			2.641		96.33	2.218		103.09
	362.611	8.873		3.169									15.844	7.183			12.041		94.323	5.493		21.547
	45.419	13.943		96.752									44.363	36.546			12.464		9.823	15.738		3.908
	66.861	12.886		1.901									1.584	108.899			3.697		43.518	20.174		22.921
		8.873		2.958									13.837	25.35			6.443		101.823	13.837		14.999
		35.068		2.746									61.791	0.528			23.871		111.963	21.97		25.244
		0.528		13.098									26.195	319.304			5.387		145.868	3.908		2.007
		3.486		8.344									72.881	3.591			6.126		10.879	3.063		1.056
		0.423		19.118									21.125	1.162			104.463		51.017	338.951		27.568
		240.508		39.187									32.638	4.225			21.653		26.195	16.266		8.344
		5.07		76.05									8.556	8.239			245.05		15.316	127.912		2.007
		18.59		23.132									12.569	65.593			9.823		5.176	4.964		12.675
		13.098		25.878									38.025	6.338			7.183		15.738	7.394		3.063
		64.748		18.907									10.668	2.958			8.767		42.356	171.641		4.647
		5.598		5.809									20.069	31.582			46.898		10.668	81.331		9.401
		39.398		10.034									48.165	194.984			4.436		60.734	11.619		49.221
		4.647		4.964									42.778	146.185			15.949		22.393	6.021		2.746
		39.187		8.556									3.697	6.338			23.871		11.196	14.787		17.534
		672.937		286.138									8.133	7.394			4.014		6.76	1.056		41.616
		70.135		8.661									1.796	4.225			8.978		9.506	17.639		0.634
		241.881		22.393									31.265	4.647			1.268		13.203	5.493		13.098
		4.753		6.443									22.076	3.169			9.506		15.844	30.737		5.387
		10.985		8.239									49.538	4.014			121.68		0.423	12.781		34.223
		3.908		62.108									3.908	114.181			487.248		185.583	0.528		16.478
		0.528		12.886									18.062	16.161			34.011		32.849	3.063		74.888
		57.038		125.483									14.365	106.893			6.971		171.218	2.852		2.007
		62.002		9.084									10.668	18.59			14.576		233.959	7.605		3.169
		121.574		25.139									24.505	34.011			11.408		74.994	5.915		62.847
		30.526		42.884									48.904	87.141			69.396		72.67	298.813		6.971
		19.752		7.605									507	52.707			55.453		41.933	1.69		75.416
		330.395		21.336									38.553	4.859			8.978		829.896	7.288		6.126
		0.951		22.815									93.267	4.014			11.83		1283.24	4.647		32.321
		7.077		7.183									33.906	85.134			16.161		89.464	64.642		384.686
		11.513		102.245									160.55	6.126			0.951		18.168	165.198		12.041
		57.566		111.012									19.012	448.167			1.268		21.442	73.832		13.943
		25.139		317.614									10.985	8.133			128.334		14.787	20.174		36.546
		21.231		99.182									28.413	17.851			16.055		2.852	5.704		122.525
		70.663		8.45									135.411	33.272			14.576		5.704	15.421		9.929
		196.251		29.153									14.048	33.694			9.189		178.084	44.257		16.372
		9.189		1.268									92.422	83.655			34.011		63.798	155.058		57.46
		22.076		428.943									49.538	94.323			7.183		1.268	51.334		14.682
		5.809		60.629									197.096	35.913			17.006		8.661	10.351		184.104
		1.479		67.283									30.314	66.966			33.061		177.344	9.295		26.195
		51.017		106.153									202.694	16.372			12.569		29.258	13.837		1.69
		855.879		54.08									78.479	7.499			29.469		37.286	666.916		3.908
		11.091		5.809									9.189	24.294			12.464		327.543	219.806		192.871
		14.048		2.113									19.541	154.741			3.169		435.281	48.271		20.914
		0.634		87.141									44.891	32.427			2.007		212.412	27.779		15.738
		19.435		10.14									67.178	18.59			28.413		50.383	38.87		51.334
		8.661		13.731									314.868	284.871			5.598		33.166	35.49		8.661
		12.781		2.218									33.272	104.146			10.14		1263.49	0.634		2.218
		4.859		71.931									148.509	7.816			2.007		12.253	129.074		538.265
		58.939		124.849									18.59	11.619			15.527		6.443	83.866		236.917
		98.865											104.78	1.901			25.561		15.21	64.748		8.873
		226.566											57.883	69.713			27.463		514.183	0.634		32.004
		37.919											69.818	25.984			4.964		3627.27	412.677		15.633
		76.05											128.123	13.52			12.147		1115.4	33.589		2.852
		535.941											111.434	2099.4			27.251		1893.33	15.421		31.688
		2.958											2.958	149.776			0.634		43.306	6.232		5.915
		132.876											1.056	5.809			128.651		495.276	85.979		14.471
		22.287											1.056	227.094			53.763		4.436	23.766		7.605
		0.528											5.915	14.365			23.026		509.535	39.821		10.774
		0.528											1.268	1.162			4.331		13.414	42.884		281.808
		0.845											2.007	3.274			18.484		2.746	10.774		34.962
		3.803											4.014	4.436			1.479		47.531	55.242		4.436
		4.014											31.582	61.791			18.696		28.941	3.38		2925.07
		48.165											0.845	6.338			16.689		21.653	20.703		31.159
		15.633											54.186	211.25			7.288		7.499	29.892		5.704
		27.674											6.443	72.248			1.268		38.659	0.528		4.753
		103.196											4.859	19.858			3285.99		14.259	13.309		1.584
		1.268											1.268	6.866			21.864		2.852	62.424		498.761
		15.949											6.338	1.373			63.903		4.014	42.673		36.969
		10.246											17.111	7.499			0.423		132.665	1.268		4.542
		41.511											6.232	4.647			0.528		2.007	5.915		7.922
		0.951											88.302	14.365			501.613		38.236	122.631		4.647
		6.866											173.225	17.428			1035.23		95.062	2.113		8.45
		17.006											3.274	29.258			840.353		68.762	116.927		34.856
		17.323											4.859	39.821			31.265		17.956	2.958		23.977
		0.951											10.879	45.524			36.969		281.491	191.287		28.836
		4.225											7.499	44.151			176.922		171.324	158.86		115.976
		2.113											1.901	49.221			57.671		24.928	29.047		68.762
		13.414											235.227	7.711			28.413		8.978	50.806		22.709
		4.859											30.42	5.176			398.418		20.386	46.792		3.169
		14.365											1.796	8.556			14.999		472.989	4.542		19.329
		10.351											26.301	32.849			124.321		13.731	77.001		24.083
		1.584											8.45	2230.38			91.999		34.328	46.581		17.745
		2.958											28.73	52.284			19.858		132.031	3.486		15.21
		7.077											334.092	96.013			32.638		119.039	7.288		5.809
		5.387											2.007	44.468			12.041		35.279	75.944		7.288
		2.746											12.147	42.461			3.169		23.977	0.951		126.222
		1.479											1.162	19.224			16.689		31.371	346.978		40.138
		14.365											58.833	3.591			45.947		4.542	7.077		28.202
		236.706											65.804	7.605			49.538		6.126	4.964		12.041
		6.76											20.386	6.76			22.287		26.934	3.908		52.812
		5.598											121.786	9.718			35.173		6.443	18.59		7.605
		8.45											81.014	10.246			17.639		15.633	2.535		8.556
		26.301											13.414	13.203			0.739		23.554	33.483		207.236
		203.117											5.281	13.098			53.869		57.883	79.853		3.169
		29.786											3.38	13.837			30.737		262.584	89.042		70.241
		60.946											19.541	79.219			49.221		24.188	15.738		7.922
		797.152											2.218	2.113			9.929		10.14	16.055		297.863
		6.76											177.133	34.539			10.034		10.879	4.964		23.238
		31.159											1805.03	21.125			23.132		260.366	106.998		0.634
		18.273											158.754	826.304			86.296		52.707	54.186		3.063
		289.096											79.008	64.854			88.936		25.773	83.338		12.675
		0.845											23.132	135.2			29.997		290.152	85.979		113.124
		0.951											4.859	10.774			2.218		25.35	112.913		13.203
		0.317											60.946	3.908			50.911		50.594	17.639		14.365
													41.194	14.999			260.788		105.519	0.951		157.909
													0.845	63.481			36.018		84.923	10.14		41.722
													10.457	8.239			537.209		3.803	11.091		331.663
													2.958	602.591			7.922		16.055	38.342		4.753
													31.159	5.915			12.147		78.057	1420.44		26.618
													24.188	17.745			37.919		25.878	16.266		19.118
													9.612	137.524			42.673		211.039	199.948		7.499
													7.922	12.569			1.056		201.11	0.634		19.224
													8.978	9.401			261.633		60.206	31.265		6.654
													30.737	18.273			6.232		14.259	25.561		41.405
													14.682	240.297			21.759		7.922	2.113		80.486
													6.021	62.53			43.095		72.987	67.178		62.53
													46.264	3.908			195.406		150.727	33.166		20.386
													20.386	6.443			70.769		14.048	313.178		2.535
													3.169	363.139			407.713		47.426	3.908		10.246
													19.224	20.597			643.679		15.316	20.491		17.323
													12.147	181.358			3.803		22.287	13.098		35.068
													5.809	150.938			50.489		28.624	1648.07		12.569
													9.401	26.301			59.361		10.668	15.21		7.077
													50.278	58.094			6.443		4.753	318.142		76.05
													31.371	220.123			11.936		3.591	3.169		3.169
													0.317	22.181			2.429		23.026	9.506		1.69
													42.567	21.547			1.479		7.711	26.089		2.007
													9.401	5.598			20.597		611.991	25.773		62.847
													11.513	189.703			4.119		50.172	12.781		25.244
													74.677	3.908			30.631		87.352	6.76		6.232
													6.338	149.248			12.147		374.546	7.711		5.598
													38.764	122.103			3425.21		123.053	12.675		15.316
													542.913	83.972			84.289		10.774	4.119		12.569
													2.324	7.394			1.69		647.164	9.295		0.634
													1368.16	6.654			35.913		217.482	5.704		4.331
													153.262	110.589			1824.14		82.599	13.203		7.922
													84.078	25.561			8.873		29.575	15.21		7.183
													276.632	6.126			12.992		130.764	29.575		99.499
													6.76	48.482			709.483		3.486	10.774		13.943
													3.274	31.793			26.723		27.568	2122.01		6.232
													102.879	11.091			18.59		231.319	25.878		76.684
													136.784	5.176			98.337		420.282	22.498		15.527
													11.83	9.506			10.034		53.974	60.418		21.759
													17.323	22.498			34.117		23.871	37.391		35.701
													3.38	84.289			3.803		53.129	14.576		3.063
													2.535	28.73			2.007		31.793	57.671		5.493
													31.159	30.948			0.211		38.342	7.922		61.368
													12.886	42.461			0.634		22.287	34.223		43.94
													1.901	173.436			0.106		3.38	49.432		158.966
													483.34	633.011			1.056		5.281	276.421		3.486
													66.649	170.584			17.006		29.786	32.533		16.9
													63.375	8.344			7.605		17.323	23.132		2.007
													9.189	13.52			12.464		12.992	1100.93		29.681
													43.834	2.958			3.169		5.281	1151.42		8.873
													50.383	20.597			0.528		3.697	27.991		8.45
													5.598	77.634			501.824		201.004	42.039		12.569
													18.484	33.061			5.176		473.306	202.272		9.929
													16.583	9.929			22.921		204.807	3.486		23.449
													17.006	25.033			72.776		25.35	33.906		34.751
													93.689	10.246			13.098		12.253	50.066		1.268
													7.077	10.457			102.351		261.528	2.113		7.922
													10.457	44.257			7.077		9.929	10.774		10.774
													9.929	408.874			0.951		66.755	4.119		55.559
													2.007	1.268			9.929		62.847	6.866		138.58
													33.589	17.534			45.63		37.708	8.027		344.126
													27.04	16.266			12.464		8.978	87.986		21.547
													65.382	12.781			2.852		8.344	20.808		26.089
													5.809	21.231			3.486		4.331	7.183		2.641
													8.873	66.227			73.515		65.171	51.228		5.704
													14.365	286.244			0.845		139.953	17.639		16.583
													28.624	0.106			0.845		110.906	12.253		17.956
													53.763	0.423			21.864		291.948	205.652		3.803
													12.147	19.963			1.373		48.271	15.738		34.645
													9.189	140.27			14.787		24.505	4.542		24.188
													8.133	557.594			7.499		5.809	14.365		28.202
													49.538	16.055			268.393		10.774	6.232		111.751
													6.76	61.896			25.244		12.253	11.196		293.743
													296.067	9.612			8.767		18.59	28.519		423.768
													163.93	1011.47			6.232		81.859	31.688		124.532
													66.755	16.055			14.999		14.576	340.007		40.771
													12.992	4.014			9.401		94.746	166.888		61.263
													114.92	210.405			1.584		6.126	546.081		103.829
													6.866	119.673			6.549		2.746	15.21		53.869
													110.906	9.612			20.597		64.22	11.724		492.318
													265.964	31.371			3.38		4917.37	315.396		13.203
													167.838	14.893			5.281		207.131	42.567		108.371
													68.973	5.07			350.253		72.987	24.294		128.968
													12.781	157.804			28.096		59.678	10.034		71.931
													0.845	273.569			3.803		381.729	55.136		215.369
													140.27	88.936			14.471		12.781	10.034		4.647
													257.831	6.549			14.682		12.147	12.147		34.751
													72.987	66.438			22.287		151.255	17.428		3.803
													315.291	3.063			9.189		3.908	24.928
													327.966	0.739			5.387		4.119	282.969
													0.845	3.697			6.866		17.428	36.546
													40.666	163.191			1.373		15.21	102.245
													148.192	44.679			94.429		10.457	36.335
													69.924	47.003			36.335		45.947	6.126
													6.338	11.936			12.886		46.158	15.844
													30.526	246.106			439.189		4.647	1.584
													30.737	4.964			18.168		4.964	3.169
													14.471	17.323			95.908		8.239	40.56
													13.52	23.766			204.701		25.561	77.74
													23.554	50.806			48.271		28.73	222.763
													4.542	0.211			9.084		26.618	17.217
													2.007	4.647			33.166		888.518	3.908
													8.133	3.908			39.715		44.785	65.171
													2.007	33.8			140.376		7.499	19.752
													424.296	344.549			0.211		9.506	1.796
													654.981	19.858			9.929		1.373	5.176
													23.449	109.533			58.833		19.329	67.494
													0.423	7.394			5.493		27.991	7.605
													8.45	8.978			5.387		323.846	266.069
													4.859	6.76			2.218		29.892	45.313
													42.778	5.281			25.878		8.767	86.824
													5.07	7.288			5.07		16.055	49.961
													7.922	14.682			40.138		3.908	4.647
													189.491	10.774			20.174		8.45	87.458
													62.002	19.752			0.317		44.785	14.787
													7.711	9.506			5.493		3.591	4.225
													13.837	42.039			10.457		52.496	11.196
													3.486	59.256			19.224		18.59	34.434
													3.591	162.451			3.697		135.411	7.077
													22.181	2.324			0.423		68.762	56.826
													2.958	5.387			8.027		25.773	110.378
													8.45	27.885			13.52		60.734	13.731
													26.301	9.929			5.176		11.091	14.048
													348.985	2.007			5.176		232.269	157.276
													562.242	18.379			26.829		48.165	6.021
													11.513	241.564			5.07		16.372	17.111
													177.133	529.393			17.534		12.886	33.061
													27.568	2.535			1.901		26.934	18.273
													14.893	71.191			2.535		450.491	16.266
													9.823	11.091			6.549		990.551	5.598
													0.211	45.841			32.638		446.266	13.943
													13.837	11.619			8.661		39.398	48.693
													3.697	7.077			5.387		162.029	16.266
													8.661	245.895			66.544		22.604	1574.23
													28.519	1.373			3160.09		250.648	30.314
													577.241	59.256			9.612		11.408	23.871
													323.846	69.501			7.394		41.299	3.908
													86.507	119.779			17.006		36.863	10.668
													92.739	2.852			4.647		30.42	4.331
													18.801	67.389			10.034		1.373	2.324
													10.668	9.506			4.647		81.12	3.486
													4.225	5.704			2.324		8.661	74.782
													42.673	8.556			127.173		113.441	17.956
													54.608	34.117			16.9		15.421	0.634
													6.021	4.859			2.746		1.268	25.878
													4.647	229.312			4.859		20.069	1190.5
													3.274	120.201			39.398		75.733	123.37
													2.958	1.373			32.11		1.69	60.312
													9.189	34.223			12.781		79.43	32.849
													6.76	91.577			5.493		29.469	21.231
													15.844	30.948			0.634		1096.49	44.996
													10.562	65.804			6.021		20.914	400.53
													2.324	9.612			6.338		156.008	55.242
													0.528	93.161			1.796		8.873	25.033
													0.528	258.57			76.261		55.136	14.576
													36.969	11.513			3.486		149.143	56.721
													9.295	32.849			113.019		110.801	17.639
													2.218	7.711			206.603		37.074	171.746
													24.505	25.561			34.328		47.214	26.089
													2.113	3.486			8.978		6.126	25.561
													2343.5	8.978			16.055		163.824	116.61
													32.533	11.091			36.863		231.424	1.162
													11.83	97.598			4.647		46.264	2.535
													14.893	13.731			20.386		18.696	9.506
													4.331	1.162			7.816		1.796	4.331
													12.464	0.634			1.796		1525.12	8.978
													2.852	164.986			1.796		131.926	48.376
													80.275	107.315			212.306		813.735	17.323
													6.443	91.894			5.387		21.231	50.594
													81.014	83.233			8.767		15.316	136.679
													67.6	4.542			40.454			36.018
													5.915	15.421			171.641			19.118
													4.542	23.554			3.908			163.296
													78.585	91.154			5.704			505.733
													7.077	9.718			3.38			169.951
													14.154	5.915			18.907			60.312
													18.696	11.619			234.488			99.604
													8.45				128.651			41.616
													21.442				19.012			26.618
													26.406				7.394			10.774
													5.387				15.316			0.423
													25.139				8.45			695.118
													26.512				4.647			124.532
													2.746				18.273			158.754
													1785.38				21.547			13.626
													5.809				148.298			41.511
													11.83				27.568			2.113
													12.992				12.253			84.606
													112.068				14.682			32.11
													3.063				25.984			128.546
													21.336				1.056			374.441
													18.696				5.598			76.789
													22.921				27.674			1.901
													39.821				1.796			384.792
													19.118				11.091			13.414
													1825.83				2.746			2.007
													38.659				131.186			15.104
													15.527				5.493			3.908
													24.294				5.493			0.317
													21.97				136.679			32.849
													422.183				9.401			58.939
													96.752				95.274			32.638
													2.746				214.102			575.234
													3.274				35.596			7.183
													0.423				1075.68			54.503
													2.535				13.52			188.329
													1.479				26.406			8.344
													4.753				75.733			11.302
													0.845				29.892			5.493
													0.106				5.704			4.647
													2.746				14.154			77.846
													42.144				0.423			2.429
													197.519				1.373			22.393
													18.59				6.443			38.236
													170.268				1.056			17.851
													195.301				1.69			51.228
													113.758				220.123			14.999
													4.859				1.901			124.426
													54.186				2.746			1.268
													37.286				3.274			331.557
													57.249				47.531			38.553
													61.051				17.639			40.56
													0.528				8.978			13.414
													10.246				5.493			25.033
													350.253				5.176			13.52
													361.871				59.256			14.259
													26.618				21.231			1.162
													58.833				17.851			4.119
													23.871				7.288			73.938
													25.033				3.169			54.397
													4.331				63.798			18.062
													14.682				40.771			3.274
													295.328				1.69			77.106
													96.541				2.007			108.371
													416.796				7.499			2.429
													189.174				4.014			25.984
													619.174				19.858			37.602
													4.014				2.746			27.146
													64.642				5.493			24.083
													512.809				19.224			5.281
													709.589				27.04			8.873
													21.336				180.619			19.118
													29.364				194.773			1.584
													37.602				73.093			40.243
													12.781				9.823			27.146
													3.803				4.331			10.457
													49.538				2.324			3.908
													47.637				4.964			11.619
													4.014				12.464			72.353
													15.104				17.639			343.598
													4.014				52.073			1.69
													2.324				30.948			0.528
													8.133				38.553			5.493
													127.806				2.324			50.594
													85.345				40.877			23.871
													8.344				21.547			37.391
													8.239				28.624			42.25
													63.269				12.147			50.806
													59.995				6.338			127.489
													20.597				46.792			7.922
													4.014				2.535			5.704
													2.852				7.816			4.542
													519.886				32.638			3.274
													4.225				35.807			200.582
													3.591				26.829			21.97
													3.063				338.845			68.868
													6.338				60.312			91.154
													83.233				14.048			46.053
													175.866				23.449			599.844
													31.582				13.943			11.408
													6.021				10.562			7.711
													9.295				60.946			4.014
													1.373				8.133			4.331
													0.634				2.852			12.781
													1.69				34.328			0.423
													169.317				36.652			32.004
													16.689				2.007			178.929
													6.338				9.929			45.208
													1.056				146.291			139.953
													152.628				32.216			115.343
													49.538				302.933			25.773
													9.084				3.063			71.614
													28.308				31.371			26.512
													276.209				8.873			237.973
													6.549				2.113			55.664
													8.661				4.647			29.153
													57.249				498.444			8.978
													1994.94				8.767			103.407
													50.066				8.978			61.263
													118.194				86.401			9.084
													66.438				353.104			6.338
													11.724				21.864			92.633
													25.244				8.45			7.605
													2.535				4.225			51.545
													0.317				153.79			1.056
													49.961				36.441			0.739
													12.147				4.119			32.004
													78.268				15.633			190.759
													17.956				2.218			50.066
													9.506				64.22			10.457
													5.704				6.338			0.423
													13.626				7.816			23.977
													4.964				16.055			11.619
													178.401				54.08			370.004
													73.515				220.228			1.901
													37.286				65.276			40.454
													219.172				6.338			31.688
													167.627				10.879			101.823
													205.758				29.469			42.673
													436.971				40.56			5.915
													4.859				1.901			1.584
													12.147				4.542			194.139
													8.661				11.619			56.932
													0.951				4.331			10.457
													125.06				23.66			2.429
													243.36				1.373			0.845
													2.113				165.514			10.879
													3.908				5.598			6.549
													2.535				9.823			6.338
													301.348				61.685			1.479
													80.169				8.027			30.948
													70.029				140.059			193.399
													5.598				24.505			59.784
													0.211				40.771			89.042
													1.373				109.005			1.584
													1.584				209.138			6.232
													4.331				12.358			7.288
													3.803				164.775			14.893
													3.908				897.179			22.921
													1.056				276.949			128.546
													20.28				24.716			10.457
													4.436				140.798			86.401
													23.871				1.479			0.845
													28.413				0.211			333.247
													4.331				14.787			154.001
													1.584				33.483			5.493
													0.528				35.49			45.208
													37.286				3.486			87.035
													3.38				11.196			79.324
													76.156				167.416			4.964
													34.962				85.451			23.977
													6.654				42.567			43.834
													19.646				95.696			4.753
													4.331				27.991			181.358
													0.951				5.915			0.528
													5.07				5.176			160.444
													5.915				14.259			4.331
													168.049				6.866			2.958
													24.083				8.133			1145.71
													163.296				24.505			467.391
													5.915				5.704			59.784
													109.322				8.661			55.136
													4.436				57.038			11.936
													5.176				35.068			116.082
													28.836				158.226			1.268
													9.823				0.634			12.992
													32.216				3.591			0.951
													8.556				17.217			110.695
													7.183				8.661			2.746
													880.384				3.38			176.605
													23.977				62.002			93.584
													8.133				34.645			25.878
													4.542				199.737			5.176
													3.274				230.896			0.739
													290.152				20.703			5.387
													37.602				178.295			12.358
													0.634				84.183			46.053
													12.147				10.351			18.062
													729.658				44.468			12.781
													14.999				24.399			73.726
													0.845				64.748			197.308
													4.225				75.733			50.594
													2.746				88.514			22.393
													46.264				21.231			0.423
													102.668				1.796			1.479
													39.715				1.373			2.113
													9.718				8.873			9.401
													6.126				11.302			14.365
													5.281				40.454			1.479
													5.598				16.266			52.073
													3.803				2.007			57.249
													39.715				14.048			13.837
													190.653				22.498			32.849
													61.579				9.189			1.268
													45.63				5.704			6.866
													2.958				1.69			2.113
													1.69				44.151			9.295
													2.218				130.764			14.893
													411.938				59.995
													32.849				136.573
													41.088				9.506
													102.773				2.852
													31.582				17.534
													5.598				4.014
													18.59				8.344
													11.408				45.736
													327.86				30.526
													16.055				28.096
													17.639				0.423
													71.403				0.106
													10.246				68.973
													6.76				23.766
													13.731				3.486
													14.893				0.739
													13.309				139.847
													2.535				61.368
													9.084				8.767
													100.872				68.128
													99.499				26.618
													43.518				43.834
													36.335				64.748
													0.951				77.846
													16.372				17.111
													6.126				2.113
													20.914				45.841
													26.618				26.301
													16.161				16.689
													17.323				6.654
													1.584				620.758
													4.859				35.913
													4.436				1.479
													155.797				0.739
													16.794				7.288
													46.792				5.915
													1.479				1.268
													5.493				3.803
													1.268				3.169
													0.317				22.181
													17.956				572.488
													43.834				84.183
													0.634				32.216
													36.758				23.343
													19.118				3.697
													9.506				8.133
													3.274				0.634
													32.427				3.591
													35.49				3.803
													37.708				13.837
													6.76				2.429
													5.809				2.535
													5.387				57.46
													67.6				73.515
													0.528				3.908
													0.739				34.962
													1.69				34.539
													185.9				17.111
													149.037				8.556
													6.126				8.978
													6.232				98.02
													0.739				14.682
													0.739				20.174
													15.844				45.736
													1.584				5.598
													3.697				2.007
													8.133				19.541
													0.739				52.179
													98.443				96.647
													104.252				4.119
													5.176				24.822
													603.753				33.061
													277.266				16.161
													21.864				50.911
													3.063				17.639
													3.169				0.951
													0.739				4.014
													0.951				1.584
													128.018				9.718
													5.915				15.527
													5.809				89.359
													1.268				63.164
													1.162				1934.63
													2.218				24.716
													0.423				143.861
													2.007				1.479
													1.373				1.056
													9.718				1.584
													2.958				49.749
													8.873				271.668
													8.344				4.542
													0.951				22.815
													16.583				51.017
													9.929				132.031
													52.812				5.704
													3.169				0.423
													409.508				26.301
													219.278				2.324
													6.549				24.399
													248.219				71.086
													254.979				2.429
													17.323				54.819
													1.373				47.743
													26.195				196.146
													179.351				6.76
													3.274				3.274
													3.486				5.915
													7.288				11.724
													7.394				34.434
													33.483				104.358
													134.566				177.978
													7.499				58.199
													126.539				63.586
													47.214				12.253
													38.131				11.513
													24.505				23.238
													40.349				322.262
													29.258				10.14
													19.963				2.746
													7.288				5.598
													10.668				85.345
													195.089				20.174
													90.732				7.077
													198.786				6.76
													0.739				5.281
													28.624				2.852
													9.295				33.694
													5.809				13.309
													0.423				12.675
													4.647				128.018
													0.739				3.591
													2.324				63.692
													1.162				69.079
													5.07				4.964
													2.007				0.634
													11.196				1.162
													14.154				22.287
													1.162				15.633
													2.324				62.213
													18.273				21.125
																	44.785
																	0.951
																	312.122
																	492.635
																	14.893
																	17.745
																	6.232
																	2.641
																	56.826
																	2330.93
																	147.981
																	0.951
																	313.178
																	0.634
																	8.661
																	30.209
																	292.159
																	77.001
																	45.208
																	12.358
																	5.598
																	2.429
																	5.915
																	2.746
																	22.709
																	42.461
																	106.048
																	0.634
																	12.041
																	10.246
																	411.198
																	239.663
																	0.528
																	2.429
																	73.304
																	1.69
																	10.351
																	37.708
																	14.365
																	35.173
																	2.746
																	9.401
																	85.451
																	5.07
																	41.299
																	3.274
																	0.845
																	8.873
																	30.948
																	7.288
																	7.605
																	54.291
																	22.815
																	25.561
																	16.9
																	35.701
																	2.007
																	2.641
																	0.317
																	8.556
																	11.936
																	79.958
																	4.964
																	40.349
																	26.512
																	361.343
																	34.434
																	70.874
																	14.471
																	1.268
																	6.338
																	0.739
																	26.512
																	70.452
																	2.852
																	1.69
																	20.174
																	17.323
																	2.429
																	6.338
																	21.864
																	0.423
																	34.539
																	1.901
																	30.42
																	3.803
																	1.796
																	0.317
																	9.718
																	9.084
																	0.634
																	30.843
																	13.414
																	0.211
																	64.854
																	14.893
																	1.268
																	8.661
																	13.203
																	5.281
																	0.739
																	1.373
																	145.868
																	17.111
																	7.816
																	50.7
																	83.021
																	6.443
																	154.635
																	0.634
																	2.429
																	43.94
																	15.949
																	21.019
																	2.535
																	240.297
																	5.809
																	18.168
																	52.707
																	1433.86
																	2.958
																	1.373
																	0.528
																	235.544
																	5.598
																	7.922
																	3.591
																	27.568
																	13.626
																	42.25
																	9.612
																	15.21
																	73.409
																	0.739
																	301.665
																	15.949
																	16.794
																	1.69
																	77.001
																	3.274
																	6.338
																	23.977
																	18.59
																	1.373
																	4.753
																	85.979
																	0.951
																	32.11
																	43.306
																	2.324
																	74.043
																	0.423
																	0.845
																	47.954
																	761.134
																	189.808
																	43.834
																	136.996
																	105.625
																	1.584
																	17.006
																	48.904
																	13.098
																	0.634
																	2.218
																	8.661
																	1.268
																	4.753
																	1.584
																	212.623
																	449.963
																	1381.89
																	65.276
																	30.103
																	1.69
																	3.169
																	126.011
																	86.19
																	151.678
																	15.21
																	4.436
																	41.194
																	7.816
																	0.845
																	1.901
																	4.331
																	67.072
																	116.504
																	11.513
																	14.048
																	0.739
																	29.469
																	5.915
																	8.556
																	19.963
																	17.006
																	16.372
																	33.378
																	0.423
																	5.281
																	33.378
																	79.747
																	1.056
																	62.636
																	3.908
																	1123.64
																	7.922
																	65.487
																	229.417
																	228.889
																	14.576
																	77.106
																	2.218
