# Supplementary material for: Neural control of growth and size in the axolotl limb regenerate
Source: eLife journal article supplement (doi:10.7554/elife.68584), 2021-11-15
Supplement: supp [file elife_poa_e68584_Figure_4_figure_supplement_1_source_data_1.xlsx]

## Sheet: Source data
Late Tiny Limb Denervation Exp.
0 days post denervation	Animal #	Body Length	LFL				RFL						0 DPDN
			Stump	Regenerate	Total	LFL:BL	Stump	Regenerate	Total	RFL:BL			Full Innervation	Full Denervation
	533	16.9	0.9	2.3	3.2	0.189349	0.9	2.45	3.35	0.198225		Limb Length (cm)	3.3	3.2
	534	17.2	0.9	2.35	3.25	0.188953	0.9	2.6	3.5	0.203488			3.35	3.25
	525	16.9	0.8	2.5	3.3	0.195266	0.8	2.4	3.2	0.189349			3.2	3.35
	535	17.5	0.8	2.55	3.35	0.191429	0.8	2.7	3.5	0.2			3.5	3.5
	536	17.4	0.75	2.45	3.2	0.183908	0.8	2.55	3.35	0.192529			3.35	3.2
4 days post denervation	Animal #	Body Length	LFL				RFL						4 DPDN
			Stump	Regenerate	Total	LFL:BL	Stump	Regenerate	Total	RFL:BL			Full Innervation	Full Denervation
	533	17	0.9	2.325	3.225	0.189706	0.9	2.45	3.35	0.197059		Limb Length (cm)	3.4	3.225
	534	17.4	0.9	2.35	3.25	0.186782	0.9	2.6	3.5	0.201149			3.4	3.25
	525	17.1	0.8	2.6	3.4	0.19883	0.8	2.4	3.2	0.187135			3.3	3.35
	535	17.7	0.8	2.6	3.4	0.19209	0.8	2.75	3.55	0.200565			3.55	3.5
	536	17.6	0.75	2.55	3.3	0.1875	0.8	2.6	3.4	0.193182			3.4	3.2
												Growth Rate
													Full Innervation	Full Denervation
												Growth Rate (cm/day)	0.025	0.00625
													0.0125	0
													0.025	0
													0.0125	0
													0.0125	0
												AVG	0.0175	0.00125
												SEM	0.00306186	0.00125
												T-test P-value	0.00117354
Cell Proliferation in the Epidermis				Cell Proliferation in the Soft Tissue				Cell Proliferation in the Skeleton
Average Labeling Index (Percent Proliferation) from Technical Replicates	Full Innervation	Full Denervation		Average Labeling Index (Percent Proliferation) from Technical Replicates	Full Innervation	Full Denervation		Average Labeling Index (Percent Proliferation) from Technical Replicates	Full Innervation	Full Denervation
	9.83726	2.12161			3.17744	1.12734			0	0
	9.88423	2.15236			3.84422	1.31444			0	0
	10.4751	4.56756			4.08283	1.35118			0.271739	0.465116
	11.4777	4.71541			4.73729	1.60974			0.840336	0.649351
	13.8917	5.84075			5.15488	1.79728			1.68901	0.840336
Avg	11.1132	3.87954		Avg	4.19933	1.43999		Avg	0.560216	0.390961
StDev	1.68807	1.66522		StDev	0.7724	0.263566		StDev	0.71825	0.380757
SEM	0.754926	0.74471		SEM	0.345428	0.117871		SEM	0.321211	0.17028
TTest - Pvalue		6.7423e-05		TTest - Pvalue		3.27267e-05		TTest - Pvalue		0.326972
Cell Death in the Epidermis				Cell Death in the Soft Tissue				Cell Death in the Skeleton
Average Percent TUNEL Positive from Technical Replicates	Full Innervation	Full Denervation		Average Percent TUNEL Positive from Technical Replicates	Full Innervation	Full Denervation		Average Percent TUNEL Positive from Technical Replicates	Full Innervation	Full Denervation
	0.783835	1.61694			0.425981	0.6212			1.64067	1.00671
	1.40381	2.07192			1.25421	1.49718			1.78314	2.39521
	1.42488	2.13323			2.50763	1.69828			4.35987	2.94118
Avg	1.20418	1.94069		Avg	1.39594	1.27222		Avg	2.59456	2.11437
StDev	0.364179	0.282054		StDev	1.04804	0.572694		StDev	1.53046	0.997343
SEM	0.210259	0.162844		SEM	0.605083	0.330645		SEM	0.883612	0.575816
TTest - Pvalue		0.336256		TTest - Pvalue		0.433163		TTest - Pvalue		0.336256
Cell Size in the Epidermis				Cell Size in the Muscle				Cell Size in the Skeleton
	Full Innervation	Full Denervation			Full Innervation	Full Denervation			Full Innervation	Full Denervation
Avg from bio reps	333.681	350.992		Avg from bio reps	171.516	178.348		Avg from bio reps	507.576	503.006
StDev	523.759	555.731		StDev	106.647	123.174		StDev	311.533	313.151
SEM	23.0796	29.0883		SEM	6.30616	5.42771		SEM	11.368	11.4271
TTest - Pvalue		0.637808		TTest - Pvalue		0.540102		TTest - Pvalue		0.776843
Cell Size Measurments in Pixels	Full Innervation	Full Denervation		Cell Size Measurments in Pixels	Full Innervation	Full Denervation		Cell Size Measurments in Pixels	Full Innervation	Full Denervation
	186.956	66.755			216.109	596.676			1115.81	41.8819
	70.663	95.168			377.609	453.131			1001.67	43.7092
	74.571	86.612			452.709	317.192			316.749	51.4216
	44.891	35.807			313.495	220.545			825.804	51.677
	128.123	66.332			147.875	415.634			1121.94	52.9521
	66.438	69.29			237.234	384.264			528.997	56.983
	67.072	68.868			101.928	109.744			567.798	60.196
	113.969	91.577			230.896	230.474			564.397	62.4918
	123.053	60.418			443.097	253.183			435.214	67.8991
	77.951	53.024			234.276	361.449			541.982	67.8991
	92.211	145.868			617.167	223.925			521.37	68.3585
	77.951	100.027			257.091	190.231			227.707	68.977
	55.348	64.326			270.506	130.658			89.97	69.0718
	163.402	60.946			255.929	216.214			184.268	70.3474
	117.561	74.677			217.588	165.409			374.564	70.4941
	60.523	110.061			303.778	230.896			214.618	70.7305
	104.569	50.172			256.774	313.284			224.357	72.1288
	79.641	43.834			278.322	184.949			466.595	78.2212
	82.282	84.711			63.903	233.326			533.222	79.4792
	52.179	137.946			219.278	277.371			765.618	81.2075
	211.673	92.211			497.916	380.461			339.061	86.1112
	294.377	99.604			264.908	258.042			409.346	86.7072
	56.826	162.346			153.262	289.518			537.808	91.4949
	72.987	97.281			243.466	250.331			1205.11	91.5186
	111.751	99.604			98.654	159.071			955.863	92.1113
	35.596	47.637			117.772	344.338			775.718	92.5851
	84.817	62.847			38.87	318.882			806.48	92.5898
	54.186	63.798			172.908	323.635			674.412	92.6691
	46.369	111.963			225.087	273.78			663.745	95.0566
	79.008	82.916			184.844	134.883			467.368	97.4206
	137.524	31.793			131.503	96.436			684.46	97.6912
	112.068	63.481			239.135	227.833			989.357	97.7932
	115.554	70.98			125.905	206.708			1610.28	99.4594
	92.211	42.461			64.854	258.781			1200.32	101.314
	106.048	72.353			116.61	140.27			373.637	101.314
	120.307	97.703			238.079	131.292			347.048	103.346
	97.386	85.134			207.131	206.18			125.731	105.19
	179.774	87.774			57.143	266.914			706.05	105.764
	79.641	93.161			313.706	111.118			298.662	106.568
	205.758	40.877			310.643	92.316			694.405	107.044
	179.985	68.868			422.606	191.604			391.569	108.2
	97.598	78.796			121.258	87.141			1209.18	112.383
	90.098	42.461			235.544	397.784			1145.49	112.944
	79.958	59.573			295.116	277.371			1205.78	115.151
	42.567	45.208			294.483	321.839			882.383	116.075
	66.332	110.589			275.681	177.873			929.995	119.843
	99.499	44.046			469.714	333.353			426.506	120.036
	139.847	66.016			543.335	289.624			356.014	120.036
	137.735	48.799			59.044	346.556			565.788	122.179
	113.758	134.461			126.539	437.076			547.547	122.179
	71.403	78.796			167.416	125.166			325.406	122.484
	145.868	50.066			72.564	165.092			553.267	123.453
	144.178	62.53			10.457	142.594			1229.12	123.732
	88.408	30.209			395.883	320.255			1316.51	123.861
	159.916	44.468			299.658	403.593			1596.11	124.585
	97.386	79.008			212.623	212.095			580.886	124.869
	116.082	42.567			300.081	170.796			137.995	125.137
	79.324	78.163			485.981	341.697			892.019	125.493
	56.298	112.808			380.567	235.544			280.06	126.149
	234.276	54.714			331.24	191.498			696.414	126.973
	44.574	117.666			141.537	122.525			526.936	128.147
	49.855	66.755			399.896	297.229			608.764	128.708
	147.664	53.024			250.12	425.141			436.502	129.503
	101.083	74.571			157.276	182.414			548.114	130.7
	90.732	53.235			367.681	207.976			536.108	132.125
	133.51	76.684			197.624	196.357			301.702	133.502
	131.714	87.246			53.341	158.543			808.49	134.067
	124.532	37.708			184.633	349.83			671.371	136.666
	78.057	29.575			498.339	153.684			796.278	136.666
	82.176	55.981			276.104	224.453			1092.57	138.745
	83.866	43.095			47.214	361.026			418.828	139.66
	80.381	34.011			35.596	260.26			267.59	142.135
	83.866	26.406			187.696	193.928			242.238	148.858
	102.245	100.872			179.879	255.401			70.028	151.417
	90.098	44.257			172.803	278.533			1025.68	151.562
	95.802	35.913			126.011	266.598			1118.64	155.082
	175.549	21.759			155.903	317.403			965.241	157.912
	128.863	75.628			133.404	345.183			457.474	160.081
	115.554	34.434			181.253	293.849			391.878	160.897
	145.446	39.081			225.087	125.483			267.745	161.846
	79.219	1245.74			277.16	292.793			305.567	164.927
	186.745	1337.11			248.008	240.508			408.11	165.54
	133.404	622.026			158.754	272.512			447.581	176.763
	91.999	1903.47			325.008	334.303			325.869	179.16
	253.078	1120.68			303.249	430.528			890.627	179.16
	216.743	1859.95			402.431	301.454			112.694	180.537
	170.69	828.628			67.389	282.019			585.163	183.322
	143.65	730.397			221.284	345.183			1089.84	184.364
	104.252	1190.82			528.97	284.871			587.843	184.649
	109.744	1211.52			105.414	229.629			384.561	185.881
	224.242	1054.45			62.53	254.134			403.936	187.781
	108.477	511.014			323.107	198.047			130.162	187.935
	2005.71	85.134			67.389	180.619			1328.67	189.796
	1728.13	74.043			282.441	218.221			689.097	190.179
	120.307	111.963			177.556	146.185			437.636	190.622
	1799.74	46.898			80.698	168.261			622.47	191.302
	197.096	57.249			71.614	180.724			613.453	191.807
	256.352	174.281			188.329	216.426			793.547	192.067
	78.268	50.911			215.475	215.898			854.093	192.924
	88.197	76.156			91.999	224.348			1339.44	193.852
	286.138	78.163			291.736	246.951			909.693	194.413
	133.193	66.861			160.127	208.715			467.317	196.096
	1155.01	89.464			194.561	136.468			429.34	196.406
	1116.77	83.021			86.824	218.221			436.502	198.113
	164.775	69.501			44.996	179.668			349.573	199.872
	1274.26	69.29			208.821	309.481			372.091	202.167
	1970.22	25.244			319.833	216.954			473.861	202.576
	136.679	61.157			268.182	196.251			793.856	202.83
	120.307	53.974			170.584	152.311			344.317	203.29
	83.655	39.821			227.622	60.84			118.62	203.392
	147.453	41.194			82.81	119.884			369.051	203.392
	128.229	44.257			16.9	286.138			388.116	203.469
	181.041	62.213			97.914	169.106			708.678	203.565
	138.897	92.105			41.828	188.963			644.473	203.754
	135.306	91.471			60.523	501.719			688.376	204.514
	160.867	44.257			309.164	151.994			517.145	205.076
	100.978	55.876			189.386	81.331			333.083	206.095
	1128.92	56.087			173.648	135.623			700.691	207.073
	33.589	86.084			113.019	188.118			910.414	207.472
	167.733	95.168			57.777	194.561			970.24	209.822
	73.093	35.807			112.913	120.624			959.934	210.993
	636.602	71.508			129.708	178.506			488.753	212.574
	160.022	151.678			55.136	89.993			571.972	213.414
	1363.2	111.434			105.836	86.718			250.689	218.023
	168.578	94.429			111.434	123.37			382.191	218.356
	277.688	36.863			99.499	105.414			551.412	218.542
	96.013	94.851			126.75	72.564			443.201	218.746
	1070.83	33.589			330.501	160.761			1030.94	220.685
	102.034	43.623			190.336	114.814			896.038	221.057
	79.324	45.419			180.302	42.884			466.131	222.954
	78.479	40.138			263.429	55.559			356.735	226.348
	93.795	22.815			247.585	101.083			357.869	226.348
	221.812	13.731			206.919	96.541			414.551	227.078
	173.225	35.701			280.434	62.108			1024.86	227.979
	374.863	52.496			123.476	73.093			780.716	229.715
	167.838	724.799			254.662	103.196			116.352	229.715
	257.619	1188.81			179.034	44.996			621.079	229.828
	255.718	1003.44			88.197	115.237			1278.02	231.088
	114.181	934.464			270.4	88.725			712.955	231.535
	1504.42	2086.73			131.926	51.334			484.373	231.914
	74.466	1616.48			111.54	92.95			448.302	234.538
	1353.48	680.542			106.364	54.08			207.198	235.754
	169	1907.06			304.728	67.389			489.113	238.234
	125.166	1150.26			148.298	80.486			590.986	238.234
	122.314	1959.24			34.117	236.811			242.341	239.403
	225.087	1363.09			103.513	114.392			1328.67	240.835
	40.56	354.266			105.836	149.565			689.097	243.183
	228.256	109.427			121.363	29.258			437.636	244.764
	253.289	1316.62			207.764	178.506			622.47	244.764
	181.041	55.559			84.5	162.451			613.453	246.754
	117.561	825.459			75.944	151.149			793.547	246.754
	1180.04	1665.6			211.567	26.723			854.093	246.856
	49.644	876.159			183.259	113.23			1339.44	247.417
	53.341	857.041			291.948	75.522			909.693	248.437
	1573.81	1494.38			210.828	55.876			467.317	249.1
	301.454	894.221			274.731	58.199			429.34	249.151
	217.165	2099.61			182.731	76.261			436.502	249.505
	1774.92	72.142			92.316	96.858			349.573	249.61
	81.859	1322.64			89.359	136.256			372.091	249.611
	1085.83	86.19			283.709	99.71			473.861	250.019
	759.232	72.142			166.043	140.587			793.856	251.445
	208.715	59.15			146.819	97.281			344.317	252.977
	123.793	85.662			297.651	36.229			118.62	256.855
	160.444	64.431			65.065	59.044			369.051	256.905
	192.449	1686.62			88.197	273.886			388.116	257.262
	161.395	39.081			203.011	510.908			708.678	257.517
	239.874	85.873			141.115	118.3			644.473	257.517
	120.307	86.401			90.626	361.554			688.376	258.21
	138.052	55.242			78.479	164.458			517.145	258.21
	154.741	66.649			66.966	178.216			333.083	258.639
	336.099	135.306			51.651	247.257			700.691	262.108
	217.376	85.873			265.647	223.286			910.414	262.108
	329.973	93.056			64.959	102.171			970.24	262.312
	223.925	69.607			334.197	43.7231			959.934	262.72
	218.116	75.733			168.894	43.9034			488.753	262.72
	217.799	83.655			157.17	166.903			571.972	265.118
	124.215	101.717			47.109	46.5069			250.689	265.424
	2456.52	58.939			23.66	152.269			382.191	267.006
	1712.6	27.885			59.044	90.9483			551.412	268.701
	94.851	49.961			125.377	108.635			443.201	269.608
	112.068	101.823			203.645	282.272			1030.94	273.205
	1044.21	36.441			95.802	42.1974			896.038	273.79
	133.299	23.66			98.971	106.122			466.131	274.626
	868.66	100.978			124.321	111.868			356.735	275.618
	123.687	46.158			116.821	76.1345			357.869	275.777
	259.838	94.218			207.553	178.036			414.551	275.831
	91.049	66.755			163.085	227.775			1024.86	276.523
	108.054	62.741			91.154	82.7781			780.716	277.14
	297.017	78.902			180.091	183.693			116.352	277.235
	150.304	62.53			248.536	71.9151			621.079	277.719
	177.239	93.795			67.389	129.106			1278.02	277.719
	84.183	77.529			146.079	302.114			712.955	280.626
	915.452	94.64			101.083	237.202			484.373	280.728
	73.304	96.541			92.528	293.585			448.302	282.922
	162.029	76.578			192.343	164.21			207.198	283.534
	100.344	63.058			213.363	33.9371			489.113	283.942
	104.78	96.752			333.669	93.3725			590.986	287.718
	184.421	43.94			79.219	249.682			242.341	288.462
	283.498	53.974			66.332	83.4963			538.117	289.043
	164.669	43.306			102.562	120.756			585.782	289.418
	895.911	29.681			87.669	233.791			351.634	289.702
	1520.79	31.899			161.606	37.1696			199.263	289.797
	798.208	16.478			73.832	41.299			215.34	290.727
	75.944	1544.98			240.403	116.447			316.852	291.504
	162.029	712.546			137.207	67.3361			76.624	292.614
	235.121	878.483			137.418	75.2369			246.824	294.451
	154.001	980.2			227.939	40.0427			433.307	294.758
	130.869	981.996			157.698	301.575			441.088	294.758
	28.096	1423.09			205.018	135.3			125.164	294.91
	285.293	1722.64			264.696	385.7			395.073	297.24
	856.619	1750.73			100.238	198.597			47.51	297.382
	144.495	1258.31			117.033	286.672			548.835	298.94
	104.569	1372.49			215.264	265.394			76.881	300.317
	111.012	749.304			51.228	190.516			179.269	301.9
	141.854	34.856			95.591	69.0421			256.254	303.64
	183.471	56.087			166.148	123.808			336.484	303.786
	82.071	112.702			151.361	238.1			507.2	304.351
	219.806	1047.06			87.669	93.7321			341.637	304.399
	1418.76	2541.02			237.234	215.565			236.982	304.399
	211.673	125.799			88.408	182.884			480.766	304.778
	106.576	515.767			151.255	92.3848			151.804	305.725
	86.084	1234.65			60.946	93.6419			528.842	307.205
	62.319	128.123			26.934	124.078			251.668	307.622
	106.576	91.366			100.238	35.0149			402.957	308.378
	187.379	1443.79			218.749	77.9306			356.787	309.565
	62.424	88.619			201.321	102.171			314.894	310.52
	35.173	87.986			120.835	87.0876			323.241	310.753
	110.906	86.507			84.711	197.429			202.045	312.255
	115.659	39.504			113.758	275.449			359.415	312.306
	168.155	41.933			157.698	209.101			331.28	312.816
	53.869	108.054			105.625	74.5186			659.777	312.918
	151.678	160.444			175.549	96.4249			391.569	313.938
	133.721	76.578			169.951	171.572			636.589	313.938
	54.291	69.501			194.878	138.622			671.835	314.295
	72.248	68.762			52.073	176.69			298.507	314.306
	2089.05	59.361			293.215	148.947			810.963	314.733
	72.459	121.891			248.853	384.803			446.293	314.734
	89.887	68.973			144.389	102.082			923.915	315.01
	1205.92	51.545			66.438	220.503			405.791	315.468
	2858.11	73.198			101.823	113.483			900.882	315.622
	1566.84	38.342			159.494	124.527			828.638	318.969
	186.851	58.094			58.094	463.899			1052.27	319.568
	221.918	89.042			199.526	209.28			511.116	320.723
	233.537	91.683			103.829	63.8342			1650.06	320.876
	296.912	43.095			69.29	329.587			323.087	323.266
	115.448	46.369			73.832	167.083			690.695	323.503
	679.274	32.849			43.94	104.326			489.577	325.825
	122.631	60.84			197.096	53.2406			386.931	326.251
	1381.68	36.863			183.471	173.726			247.803	328.196
	94.429	38.553			111.54	199.583			314.997	328.244
	43.94	101.506			142.066	80.2647			424.341	328.579
	222.446	60.206			208.821	608.448			360.703	329.239
	3291.28	74.466			92.739	379.326			363.331	330.161
	215.158	93.267			52.39	339.732			252.08	330.662
	185.161	59.15			116.927	92.2054			616.338	331.59
	129.813	73.198			79.113	51.3553			330.043	331.847
	99.921	34.645			48.693	426.91			566.664	334.088
	188.858	40.771			113.758	197.249			712.595	334.265
	160.339	79.43			125.377	315.94			292.066	335.168
	117.772	58.939			118.406	566.25			208.486	335.544
	283.075	49.538			59.361	208.741			75.078	335.645
	203.539	59.678			61.051	218.527			424.496	339.195
	256.774	95.591			108.371	157.566			108.108	339.853
	115.976	85.451			167.521	331.832			301.342	340.109
	72.248	84.923			171.535	306.423			579.856	340.109
	215.898	100.449			104.252	356.97			347.357	343.075
	1433.65	66.438			110.273	219.694			273.31	343.075
	167.838	32.955			33.483	142.123			490.659	344.649
	131.503	33.8			141.009	251.478			438.821	346.23
	2084.51	46.475			242.515	269.254			555.792	347.25
	122.948	28.73			252.127	288.916			564.552	347.301
	85.556	51.123			154.952	348.621			576.97	349.233
	197.096	39.821			24.399	273.295			881.352	350.77
	54.397	189.597			27.04	157.836			171.643	350.77
	78.691	88.091			50.594	117.433			595.469	352.706
	69.079	92.211			55.664	247.706			137.119	354.647
	124.849	70.029			76.895	315.402			142.065	354.647
	92.633	98.126			22.604	231.815			88.269	355.977
	259.415	53.341			100.872	56.5624			483.084	356.382
	69.184	27.251			75.733	189.169			368.69	357.459
	342.753	28.202			124.954	67.3361			105.892	358.473
	51.228	52.918			130.553	71.9151			100.636	359.21
	63.481	51.439			27.04	338.745			314.585	360.06
	1378.83	56.404			62.002	232.892			300.569	360.06
	217.588	53.446			95.591	54.7663			474.428	360.243
	2029.9	56.932			118.511	131.26			537.808	361.636
	108.371	79.853				109.713			411.201	363.269
	125.483	46.264				168.968			483.084	363.467
	1842.94	146.608				110.97			614.02	363.778
	101.717	77.212				60.2429			351.376	365.157
	44.891	64.748				62.8473			999.353	365.157
	63.586	51.968				138.532			134.491	365.717
	140.27	39.187				154.244			577.537	366.228
	135.094	49.538				171.034			876.354	366.694
	125.271	73.409				160.978			782.829	367.437
	143.439	48.904				415.058			590.522	367.605
	130.658	45.947				156.399			540.539	368.605
	103.301	117.666				458.243			788.394	370.716
	110.378	99.288				206.048			696.414	370.72
	97.809	79.113				135.57			135.727	371.941
	48.376	64.431				56.0235			164.584	371.97
	160.444	65.699				344.491			175.92	373.328
	112.808	60.84				409.402			99.451	375.818
	96.752	81.859				74.7881			301.239	376.787
	276.632	81.648				103.788			114.961	378.305
	63.269	34.751				162.684			364.722	379.797
	67.283	91.788				416.944			487.67	380.123
	53.974	61.685				580.256			509.313	380.123
	90.626	43.729				383.366			330.816	380.613
	2036.87	33.272				144.099			221.472	381.387
	119.568	47.743				217.63			260.221	383.254
	180.196	1774.5				10.6837			237.343	383.254
	85.556	2074.79				141.765			225.079	384.846
	149.776	1808.51				65.8996			100.121	385.409
	60.523	1437.56				329.318			94.247	385.801
	145.34	1022.03				121.654			85.023	387.755
	103.724	553.264				125.155			221.162	387.806
	1991.66	1097.65				108.456			112.333	390.394
	1250.18	874.258				302.293			61.938	390.536
	1201.91	633.961				300.408			200.705	391.02
	752.684	1348.2				533.66			228.067	391.377
	77.846	788.385				314.414			377.501	393.657
	66.438	1258.42				596.686			74.975	393.657
	70.452	1782.53				246.001			213.485	396.098
	198.047	942.703				230.109			296.962	398.642
	139.425	1036.18				167.801			383.376	399.759
	195.723	1076.42				86.9082			454.28	399.759
	121.258	956.329				311.811			249.813	400.319
	150.093	1160.61				420.086			342.101	401.172
	1117.62	1467.13				464.08			588.667	403.316
	123.476	1880.55				148.498			135.418	403.416
	1870.09	1457.62				264.047			221.266	403.634
	1924.8	2549.15				122.731			189.833	403.715
	266.598	725.538				162.325			283.564	404.589
	121.997	1661.48				63.2961			93.525	405.801
	174.493	821.234				62.9366			369.411	405.814
	174.387	1452.77				47.674			936.643	406.529
	91.788	2045.01				99.5673			612.165	407.446
	67.706	874.575				113.483			508.9	410.59
	176.394	782.259				353.469			728.465	412.438
	91.471	93.901				96.6051			71.058	416.054
	1829.53	90.098				167.352			444.592	416.323
	95.485	84.817				199.135			371.318	417.938
	102.456	89.993				202.726			461.7	420.353
	126.75	71.086				93.013			561.254	421.626
	197.096	59.467				40.8501			2108.36	421.701
	163.824	68.868				58.0881			783.344	422.597
	106.998	51.756				150.742			607.012	424.995
	109.639	113.758				243.038			654.934	426.118
	109.216	62.741				284.966			840.129	426.988
	105.942	77.318				174.535			544.971	427.291
	50.383	54.291				134.492			760.465	428.841
	45.63	267.442				161.248			162.522	430.606
	863.273	222.974				184.321			161.698	431.168
	137.207	75.839				30.7054			1186.92	431.393
	60.629	267.02				38.4268			536.52	433.412
	56.193	63.586				58.3576			640.093	434.994
	52.707	56.193				25.857			875.632	436.474
	237.656	1740.38				53.1505			685.13	437.085
	110.906	1698.56				320.609			563.006	437.494
	140.798	1003.12				68.2338			530.852	439.301
	180.619	1105.79				77.8404			196.377	439.33
	126.116	437.921				52.8811			51.941	440.146
	132.876	1384.32				88.9729			92.443	441.421
	160.339	1713.13				50.008			1061.39	442.22
	1652.93					35.1942			1154.92	442.22
	1037.98					86.8181			550.897	442.305
	911.544					66.079			673.69	443.463
	65.593					50.008			490.35	444.437
	178.506					86.0999			437.79	444.437
	73.621					31.7823			546.104	445.197
	112.279					50.008			124.7	445.623
	106.048					27.2935			696.363	447.645
	144.389					64.7326			649.162	448.27
	192.554					149.935			518.073	448.656
	1931.46					75.5063			220.75	448.818
	88.408					142.752			541.364	449.597
	55.453					98.7598			566.716	449.597
	931.507					54.587			765.515	449.597
	215.053					52.9712			824.412	449.984
	112.702					51.4445			700.125	450.094
	133.193					74.8773			635.043	450.094
	104.041					42.4669			663.075	450.411
	255.718					243.756			354.313	450.765
	271.034					308.757			631.024	450.765
	169.845					196.891			343.544	451.406
	188.224					193.119			368.845	456.266
	99.288					209.908			121.248	456.497
	126.961					259.468			68.585	456.497
	110.484					122.103			502.099	457.083
	254.979					78.5587			489.732	457.848
	43.201					139.34			751.602	461.008
	55.031					158.823			612.834	461.751
	203.751					211.704			636.847	466.624
	152.311					105.852			551.721	468.568
	341.486					161.427			265.374	470.227
	139.425					151.73			607.115	471.198
	116.082					92.2054			478.035	473.255
	218.221					46.1473			205.446	473.255
	74.36					60.1537			247.236	476.162
	1802.81					200.302			260.118	476.162
	102.245					218.258			888.308	477.08
	79.958					235.047			643.855	477.539
	71.086					157.207			264.756	480.115
	159.071					95.1685			645.298	480.593
	206.603					116.087			921.802	481.337
	112.279					64.7326			1084.38	481.337
	106.259					82.4194			947.258	481.389
	77.423					178.754			776.697	484.835
	43.095					79.0075			1967.58	484.835
	123.793					37.8879			1295.85	485.447
	92.739					147.421			228.634	486.535
	65.171					126.772			549.041	487.742
	54.503					79.3671			232.035	487.742
	83.338					57.6394			249.246	487.742
	94.64					152.538			480.972	487.742
	305.256					263.598			317.109	488.077
	172.486					78.6488			554.091	488.077
	165.831					110.97			1240.1	488.099
	156.325					195.633			1200.83	494.271
	233.114					278.95			816.992	494.783
	165.409					308.848			307.474	495.068
	225.087					178.665			297.735	496.465
	242.726					246.001			801.276	496.873
	199.314					72.4532			661.014	497.078
	195.723					69.8496			833.842	497.078
	2156.23					121.115			957.357	497.296
	290.891					276.706			1053.2	498.904
	1989.55					336.769			700.691	499.832
	1003.12					131.081			240.64	500.292
	2350.58					198.597			454.64	500.292
	1650.5					124.527			492.669	502.995
	164.775					179.562			492.669	503.416
	58.094					185.399			505.345	503.416
	132.454					94.5395			180.97	503.786
	190.653					127.579			913.145	503.811
	843.204					51.5346			1340.58	504.576
	906.896					66.5278			102.337	504.928
	86.507					40.1319			537.344	506.822
	74.994					387.047			138.046	511.329
	160.022					43.1851			280.524	512.127
	1520.37					251.208			541.364	512.892
	109.216					263.598			566.716	515.748
	1363.41					43.6339			765.515	518.044
	172.591					399.168			824.412	519.388
	125.694					143.022			700.125	520.442
	218.538					199.045			635.043	520.85
	164.141					108.007			663.075	521.331
	118.934					105.762			354.313	523.452
	98.759					73.6202			631.024	523.605
	101.506					312.169			343.544	525.543
	142.171					149.217			368.845	526.359
	164.458					72.0044			121.248	530.812
	64.748					86.7289			68.585	531.155
	833.487					185.668			502.099	531.334
	121.574					222.748			489.732	531.971
	149.037					191.863			751.602	531.971
	197.413					48.3021			612.834	532.659
	131.398					37.0795			636.847	532.659
	227.622					54.587			551.721	533.468
	101.083					60.4231			265.374	533.501
	157.698					58.1782			607.115	535.95
	163.296					37.2589			478.035	535.95
	1418.33					36.9002			205.446	537.011
	218.01					60.4231			247.236	537.583
	114.92					78.2892			260.118	537.787
	81.754					177.228			888.308	538.919
	2025.04					57.0112			643.855	539.521
	1203.49					112.316			264.756	540.643
	1438.82					71.0166			645.298	541.574
	1377.56					212.871			921.802	542.744
	53.446					83.5864			1084.38	543.28
	32.11					63.6548			947.258	543.551
	92.316					172.021			776.697	543.551
	867.393					149.306			1967.58	543.707
	114.709					161.067			1295.85	544.867
	171.535					121.743			228.634	545.235
	132.031					77.9306			549.041	545.388
	141.749					51.5346			232.035	545.898
	67.6					167.532			249.246	546.204
	168.789					328.061			480.972	546.204
	77.001					264.855			317.109	546.306
	118.194					242.14			554.091	546.714
	110.906					104.416			1240.1	546.918
	67.6					109.174			1200.83	547.831
	99.921					94.809			816.992	548.55
	72.142					184.77			307.474	548.55
	93.373					53.7786			297.735	548.959
	132.876					172.38			801.276	549.219
	106.681					64.0144			661.014	552.191
	30.631					54.4969			833.842	552.886
	147.664					84.3948			957.357	553.942
	197.519					238.369			1053.2	555.641
	117.033					127.848			700.691	555.999
	2117.25					43.3644			240.64	557.376
	1705.53					62.9366			454.64	558.241
	1049.17					163.133			492.669	561.049
	120.201					470.454			492.669	561.049
	200.688					294.842			505.345	563.447
	111.646					121.923			180.97	563.973
	83.127					125.604			913.145	564.557
	98.126					247.347			1340.58	564.671
	151.149					1299.31			102.337	564.898
	43.834					145.177			537.344	565.742
	74.571					65.3607			138.046	567.031
	178.929					27.6531			280.524	567.954
	2414.48					13.0186			313.657	567.954
	91.26					20.6499			509.673	568.854
	120.201					9.78605			285.78	569.865
	1294.12					59.8842			614.329	571.393
	61.685					162.415			441.5	581.329
	63.164					166.275			543.013	582.372
	197.096					137.635			445.88	582.762
	127.173					97.7721			550.742	584.158
	132.243					25.857			508.076	584.832
						53.8687			947.824	585.662
						111.778			452.167	587.576
						217.809			426.866	589.131
						118.332			493.029	589.131
						83.5864			666.115	590.943
						80.1745			838.428	596.452
						151.73			130.008	598.313
						162.055			439.388	598.34
						78.3794			367.453	599.921
						312.349			395.33	600.942
						186.835			590.059	601.044
						266.112			558.471	601.044
						89.9606			306.855	602.718
						115.638			884.341	605.478
						145.625			1619.09	606.043
						234.598			826.783	606.706
						91.3079			737.071	606.706
						333.447			1103.34	606.995
						261.443			967.045	608.186
						261.982			511.941	608.716
						133.236			525.699	612.266
						169.686			523.277	612.624
						253.003			243.268	613.032
						168.699			389.302	613.393
						184.411			380.593	618.088
						175.074			405.224	620.174
						147.601			538.89	624.714
						313.247			408.676	624.714
						190.246			318.192	627.027
						101.363			366.938	628.693
						187.463			333.496	628.693
						215.206			252.544	630.479
						87.8058			252.131	630.479
						111.329			259.5	631.857
						54.9457			194.007	631.857
						215.565			304.949	633.692
						62.0389			250.946	635.439
						107.019			204.879	635.529
						62.129			286.398	637.416
						109.084			297.889	637.416
						131.619			334.939	638.845
						91.6666			453.352	638.845
						183.423			301.96	639.711
						286.133			42.305	640.701
						230.019			283.461	641.144
						153.347			209.568	641.144
						148.408			178.548	642.67
						84.3948			153.093	643.997
						65.0913			259.861	648.385
						179.562			80.282	654.404
									362.094	654.404
									588.255	655.587
									482.363	655.919
									331.898	656.444
									526.111	656.444
									407.491	656.852
									411.562	659.454
									602.477	659.454
									204.209	663.807
									383.633	663.807
									1263.44	666.953
									1063.77	669.299
									1222.32	675.677
									666.115	678.279
									800.091	683.657
									853.423	689.399
									604.384	691.512
									618.812	693.124
									193.234	693.124
									343.286	693.684
									379.614	693.684
									167.212	694.644
									245.639	704.994
									269.703	707.152
									308.813	707.713
									201.891	709.027
									315.409	709.027
									125.112	709.77
									501.48	709.77
									109.293	715.237
									760.053	717.306
									528.739	718.259
									251.668	720.203
									272.331	721.18
									261.252	721.487
									316.079	721.712
									198.077	721.712
									150.362	725.058
									323.963	725.322
									214.721	727.231
									278.617	729.7
									391.672	729.938
									295.57	729.938
									195.81	732.061
									293.664	734.344
									359.982	744.086
									286.81	744.086
									460.875	746.086
									866.924	750.412
									204.622	752.452
									570.375	752.86
									126.401	757.86
									517.3	757.86
									128.256	762.347
									728.775	768.93
									251.616	768.93
									641.948	774.541
									1000.13	775.511
									832.245	788.587
									1078.45	790.815
									676.06	792.09
									205.343	793.263
									208.177	793.263
									626.438	798.99
									129.441	804.137
									420.528	806.246
									350.758	808.822
									315.976	808.822
									552.236	810.844
									928.295	816.168
									267.796	816.168
									113.518	817.353
									69.049	817.353
									52.199	817.672
									213.124	817.672
									98.678	818.515
									268.105	820.166
									60.804	823.923
									53.487	825.504
									259.449	825.504
									554.504	828.411
									207.147	828.811
									374.461	830.044
									317.47	830.674
									596.912	831.728
									714.862	832.745
									430.422	843.512
									375.698	844.889
									318.655	850.002
									447.942	850.5
									318.81	850.578
									757.992	858.255
									836.779	866.876
									114.085	875.498
									311.493	876.977
									249.349	879.425
									551.824	879.425
									410.635	879.716
									569.138	879.716
									315.461	890.393
									429.288	904.014
									106.253	904.014
									441.913	908.854
									499.264	912.584
									249.916	912.584
									182.361	917.346
									255.532	918.78
									435.523	919.012
									349.727	919.405
									462.473	922.919
									384.458	922.919
									682.502	927.277
									348.13	936.984
									365.289	936.984
									605.981	937.726
									369.927	937.726
									899.387	937.785
									798.803	937.785
									782.365	938.346
									431.607	942.871
									126.761	947.783
									504.881	947.783
									650.502	957.375
									663.487	957.895
									520.958	967.832
									310.308	968.092
									297.425	984.539
									449.694	988.732
									264.962	988.732
									189.678	990.125
									290.624	994.198
									552.442	999.347
									1465.07	999.347
									561.615	1019.04
									391.723	1031.72
									885.835	1042.67
									571.457	1042.67
									714.295	1050.78
									977.608	1053.13
									1125.65	1055.61
									852.032	1056.46
									543.219	1061.87
									618.451	1061.87
									276.556	1067.67
									443.768	1073.53
									593.511	1073.53
									337.463	1092.31
									220.956	1114.39
									329.116	1122.53
									551.412	1125.35
									192.1	1143.37
									134.851	1149.28
									732.382	1152.2
									98.781	1155.6
									481.899	1175.05
									619.224	1175.78
									859.091	1179.85
									394.97	1188.82
									156.648	1188.82
									86.981	1210.1
									107.644	1227.7
									63.123	1227.7
									123.721	1236.33
									186.226	1241.26
									501.892	1241.95
									528.894	1245.46
									434.956	1250.81
									574.6	1265.99
									303.351	1282.89
									324.117	1282.89
									531.676	1316.36
									133.46	1327.17
									206.58	1327.17
									222.914	1356.01
									291.963	1368.54
									409.913	1368.54
									710.739	1379.63
									348.748	1379.63
									92.288	1450.42
									357.663	1518.06
									185.504	1602.9
									589.801	1643.99
									306.701	1658.59
									384.922	1947.91
									405.482	1947.91
									133.409	2087.28
