# Supplementary material for: Neural control of growth and size in the axolotl limb regenerate
Source: eLife journal article supplement (doi:10.7554/elife.68584), 2021-11-15
Supplement: supp [file elife_poa_e68584_Figure_4_source_data_1.xlsx]

## Sheet: Sheet1
0 days post denervation	Animal #	Body Length	LFL				RFL					0 days post denervation	Full Innervation	Deneravation
			Stump	blastema	Total	LFL:BL	Stump	blastema	Total	RFL:BL				0.333333	0.666667	Full
	512	14.2	0.7	1.6	2.3	0.161972	0.8	1.5	2.3	0.161972			2.3	2.4	2.2	2.1
	514	14.7	0.7	1.55	2.25	0.153061	0.65	1.6	2.25	0.153061			2.25	2.15	2.25	2.1
	517	13.8	0.65	1.4	2.05	0.148551	0.7	1.5	2.2	0.15942			2.05	2.25	2.3	2.35			Growth Rate (cm/day) - Figure 4B
	521	14.8	0.7	1.5	2.2	0.148649	0.7	1.55	2.25	0.152027			2.3	2.4	2.35	2.15				Full Innervation	Deneravation
	528	15.2	0.8	1.6	2.4	0.157895	0.75	1.65	2.4	0.157895			2.25	2.25	2.3	2.2					0.333333	0.666667	Full
	529	14.8	0.65	1.5	2.15	0.14527	0.65	1.6	2.25	0.152027			2.2			2.25			Bio Reps	0.0125	0.0125	0.025	0
	532	14.5	0.7	1.55	2.25	0.155172	0.7	1.65	2.35	0.162069										0.0125	0.0375	0.0125	0.0125
	511	13.8	0.7	1.6	2.3	0.166667	0.7	1.6	2.3	0.166667										0.025	0.025	0.0125	0
	515	14	0.6	1.5	2.1	0.15	0.65	1.5	2.15	0.153571										0.025	0	0.0125	0
	530	14.1	0.65	1.45	2.1	0.148936	0.6	1.6	2.2	0.156028										0.0125	0.0125	0.0125	0
	531	14.6	0.7	1.65	2.35	0.160959	0.7	1.55	2.25	0.15411										0.025			0
																			Avg	0.01875	0.0175	0.015	0.00208333
																			SEM	0.00279508	0.00637377	0.0025	0.00208333
																			ANOVA - Pvalue		0.0129
4 days post denervation	Animal #	Body Length	LFL				RFL					4 days post denervation	Full Innervation	Deneravation					Tukey HSD Results:
			Stump	blastema	Total	LFL:BL	Stump	blastema	Total	RFL:BL				0.333333	0.666667	Full			Comparison:	P-value:	Indication in figure:
	512	14.2	0.7	1.65	2.35	0.165493	0.8	1.6	2.4	0.169014			2.35	2.45	2.3	2.1			Full IN-1/3DN	0.899995	N.S.
	514	14.9	0.7	1.6	2.3	0.154362	0.65	1.65	2.3	0.154362			2.3	2.3	2.3	2.15			Full IN-1/3DN	0.879099	N.S.
	517	14	0.65	1.5	2.15	0.153571	0.7	1.6	2.3	0.164286			2.15	2.35	2.35	2.35			Full IN-FullDN	0.0155564	*
	521	14.9	0.7	1.6	2.3	0.154362	0.7	1.65	2.35	0.157718			2.4	2.4	2.4	2.15			1/3DN-2/3DN	0.899995	N.S.
	528	15.3	0.8	1.65	2.45	0.160131	0.75	1.65	2.4	0.156863			2.3	2.3	2.35	2.2			1/3DN-FullDN	0.0357318	*
	529	14.8	0.65	1.65	2.3	0.155405	0.65	1.65	2.3	0.155405			2.3			2.25			2/3DN-FullDN	0.0924312	N.S.
	532	14.5	0.7	1.6	2.3	0.158621	0.7	1.7	2.4	0.165517
	511	13.9	0.7	1.65	2.35	0.169065	0.7	1.65	2.35	0.169065
	515	14.1	0.6	1.5	2.1	0.148936	0.65	1.5	2.15	0.152482
	530	14.3	0.65	1.5	2.15	0.15035	0.6	1.6	2.2	0.153846
	531	14.6	0.7	1.65	2.35	0.160959	0.7	1.55	2.25	0.15411
