# Supplementary material for: Neural control of growth and size in the axolotl limb regenerate
Source: eLife journal article supplement (doi:10.7554/elife.68584), 2021-11-15
Supplement: supp [file elife_poa_e68584_Figure_4_source_data_2.xlsx]

## Sheet: Sheet1
Cell Proliferation Quantification - Figure 4C
Cell Proliferation in the Epidermis						Cell Proliferation in the Soft Tissue						Cell Proliferation in the Skeleton
Average Labeling Index (Percent Proliferation) from Technical Replicates	Full Innervation	Deneravation				Average Labeling Index (Percent Proliferation) from Technical Replicates	Full Innervation	Deneravation				Average Labeling Index (Percent Proliferation) from Technical Replicates	Full Innervation	Deneravation
		0.333333	0.666667	Full				0.333333	0.666667	Full				0.333333	0.666667	Full
	7.07575	6.00858	8.12933	5.88506			5.88107	0.881717	2.12389	2.21123			1.33141	0.483092	0	1.44404
	9.62685	9.46522	8.45214	6.00534			8.04925	1.47517	2.04811	1.67051			2.74178	0.540541	0	0.378788
	11.3653	11.9938	6.74058	9.58084			5.75565	1.95005	1.75887	0.917298			1.82371	0	1.25392	0
	12.7935	11.5899	13.9962	5.38976			5.49344	3.28881	1.8839	1.83759			4	0	1.18577	0
	9.17508			2.27488			9.92436	5.29004		0.649781			2.95858	0.961538		0.873362
							7.39576						2.94118
Avg	10.0073	9.76437	9.32957	5.82717		Avg	7.08325	2.57716	1.95369	1.45728		Avg	2.63278	0.397034	0.609922	0.539239
StDev	2.18164	2.7385	3.19849	2.59496		StDev	1.72267	1.75701	0.164025	0.652336		StDev	0.941338	0.406798	0.704827	0.620002
SEM	0.975658	1.36925	1.59925	1.1605		SEM	0.703278	0.785759	0.0820123	0.291734		SEM	0.3843	0.181925	0.352413	0.277273
ANOVA - Pvalue		0.0095				ANOVA - Pvalue		9.7547e-06				ANOVA - Pvalue		0.0002
Tukey HSD Results:						Tukey HSD Results:						Tukey HSD Results:
Comparison:	P-value:	Indication in figure:				Comparison:	P-value:	Indication in figure:				Comparison:	P-value:	Indication in figure:
Full IN-1/3DN	0.899995	N.S.				Full IN-1/3DN	0.0010053	**				Full IN-1/3DN	0.0010053	**
Full IN-1/3DN	0.899995	N.S.				Full IN-1/3DN	0.0010053	**				Full IN-1/3DN	0.0022797	**
Full IN-FullDN	0.0140441	*				Full IN-FullDN	0.0010053	**				Full IN-FullDN	0.0010053	**
1/3DN-2/3DN	0.899995	N.S.				1/3DN-2/3DN	0.898284	N.S.				1/3DN-2/3DN	0.899995	N.S.
1/3DN-FullDN	0.0271885	*				1/3DN-FullDN	0.561314	N.S.				1/3DN-FullDN	0.899995	N.S.
2/3DN-FullDN	0.0440275	*				2/3DN-FullDN	0.899995	N.S.				2/3DN-FullDN	0.899995	N.S.
Cell Death Quantification - Figure 4D
Cell Death in the Epidermis						Cell Death in the Soft Tissue						Cell Death in the Skelton
Average Percent TUNEL Positive from Technical Replicates	Full Innervation	Deneravation				Average Percent TUNEL Positive from Technical Replicates	Full Innervation	Deneravation				Average Percent TUNEL Positive from Technical Replicates	Full Innervation	Deneravation
		0.333333	0.666667	Full				0.333333	0.666667	Full				0.333333	0.666667	Full
	0.582298	6.00858	10.8545	10.7586			1.0351	1.39321	1.10619	1.85557			0.900901	5.94595	12.0482	8.66426
	0.675139	7.95078	10.4888	11.8931			1.60416	1.28293	1.30039	2.5402			0.316456	10.8527	9.90991	11.6466
	0.408859	7.52956	9.42507	13.4123			1.5136	1.15192	1.47036	2.49304			0	6.69565	11.0672	11.3537
Avg	0.555432	7.16297	10.2561	12.0213		Avg	1.38429	1.27602	1.29232	2.29627		Avg	0.405786	7.83144	11.0084	10.5549
StDev	0.135158	1.02167	0.742577	1.33149		StDev	0.305773	0.120795	0.182218	0.382381		StDev	0.457045	2.64322	1.07035	1.64384
SEM	0.0780334	0.589864	0.428727	0.768737		SEM	0.176538	0.0697413	0.105204	0.220768		SEM	0.263875	1.52606	0.617968	0.94907
ANOVA - Pvalue		1.6517e-06				ANOVA - Pvalue		0.0043				ANOVA - Pvalue		0.0002
Tukey HSD Results:						Tukey HSD Results:						Tukey HSD Results:
Comparison:	P-value:	Indication in figure:				Comparison:	P-value:	Indication in figure:				Comparison:	P-value:	Indication in figure:
Full IN-1/3DN	0.0010053	**				Full IN-1/3DN	0.899995	N.S.				Full IN-1/3DN	0.0022584	**
Full IN-1/3DN	0.0010053	**				Full IN-1/3DN	0.899995	N.S.				Full IN-1/3DN	0.0010053	**
Full IN-FullDN	0.0010053	**				Full IN-FullDN	0.0133538	*				Full IN-FullDN	0.0010053	**
1/3DN-2/3DN	0.0142339	*				1/3DN-2/3DN	0.899995	N.S.				1/3DN-2/3DN	0.175566	N.S.
1/3DN-FullDN	0.0010053	**				1/3DN-FullDN	0.0070465	*				1/3DN-FullDN	0.275359	N.S.
2/3DN-FullDN	0.16555	N.S.				2/3DN-FullDN	0.0077427	*				2/3DN-FullDN	0.899995	N.S.
Cell Size Quantification - Figure 4E																			Fully Innervated - Epidermis								1/3 Denervated - Epidermis								2/3 Denervated - Epidermis						Fully Denervated - Epidermis							Fully Innervated - Muscle
																			Bio Replicate 1		Bio Replicate 2		Bio Replicate 3		Bio Replicate 4		Bio Replicate 1		Bio Replicate 2		Bio Replicate 3		Bio Replicate 4		Bio Replicate 1		Bio Replicate 2		Bio Replicate 3		Bio Replicate 1		Bio Replicate 2		Bio Replicate 3			Bio Replicate 1
																			Cell Size (pixels)	Analysis	Cell Size (pixels)	Analysis	Cell Size (pixels)	Analysis	Cell Size (pixels)	Analysis	Cell Size (pixels)	Analysis	Cell Size (pixels)	Analysis	Cell Size (pixels)	Analysis	Cell Size (pixels)	Analysis	Cell Size (pixels)	Analysis	Cell Size (pixels)	Analysis	Cell Size (pixels)	Analysis	Cell Size (pixels)	Analysis	Cell Size (pixels)	Analysis	Cell Size (pixels)	Analysis		Cell Size (pixels)	Analysis
																		AVG	521.471	205.362	79.113	195.489	140.587	207.215	246.529	295.369	86.084	131.229	109.427	223.571	91.471	219.771	96.647	135.311	97.281	147.745	84.606	220.217	74.254	239.084	70.135	307.652	51.334	264.599	74.254	178.925		185.266	102.024
Cell Size in the Epidermis						Cell Size in the Muscle						Cell Size in the Skelton						Stdev	1291.48	214.269	68.656	149.983	112.596	248.085	714.87	284.402	105.414	249.509	45.313	384.322	97.492	330.774	48.904	259.593	44.996	200.093	86.718	336.945	46.053	278.398	48.693	402.843	91.788	407.595	46.053	237.208		62.319	59.9936
Average Cell Size from Biological Replicates	Full Innervation	Deneravation				Average Cell Size from Biological Replicates	Full Innervation	Deneravation				Average Cell Size from Biological Replicates	Full Innervation	Deneravation				SEM	692.161	17.0463	71.297	12.2871	175.866	23.2353	136.468	26.1813	117.983	16.5241	48.693	33.4509	47.637	30.322	156.325	21.4841	78.163	19.0781	133.616	30.1373	75.311	32.1466	72.881	33.1135	139.108	38.6872	75.311	21.9299		120.835	5.82709
		0.333333	0.666667	Full				0.333333	0.666667	Full				0.333333	0.666667	Full			740.748		147.769		184.633		146.079		71.614		51.545		60.946		83.127		67.6		53.341		68.128		72.67		68.128		68.128			214.102
Avg	222.729	168.544	199.066	254.886		Avg	124.646	95.662	63.2903	65.0707		Avg	391.125	442.81	421.056	406.246			1066.28		87.986		148.403		462.004		83.549		46.053		53.341		43.095		47.003		74.888		106.364		38.236		71.403		106.364			91.683
StDev	227.169	303.171	282.403	364.253		SEM	13.374	11.2986	3.93287	4.86613		SEM	25.3732	42.629	62.4832	22.0211			746.663		85.239		169.845		564.883		49.221		55.664		87.352		80.909		34.328		98.126		88.936		37.814		52.601		88.936			51.545
SEM	9.78484	12.1268	16.0394	18.7849															1323.9		30.737		83.866		91.894		63.481		72.036		119.145		40.454		49.961		79.324		56.404		40.138		47.32		56.404			29.786
ANOVA - Pvalue		0.3472				ANOVA - Pvalue		0.0015				ANOVA - Pvalue		0.8361					383.102		41.088		113.124		176.288		79.958		61.685		38.553		45.63		61.051		87.141		97.809		49.01		62.319		97.809			168.894
						Tukey HSD Results:													669.134		83.233		144.918		212.201		134.989		38.976		54.608		52.707		27.991		78.268		72.248		70.874		40.243		72.248			134.038
						Comparison:	P-value:	Indication in figure:											821.974		158.543		119.356		78.796		122.419		23.026		35.384		43.201		25.244		102.984		65.065		96.224		54.291		65.065			102.351
						Full IN-1/3DN	0.177101	N.S.											467.919		520.837		261.211		563.404		83.338		59.889		72.564		82.282		52.601		106.787		68.128		78.479		51.228		68.128			27.146
						Full IN-1/3DN	0.0026435	**											536.786		147.347		127.278		845.211		58.199		66.227		74.888		41.299		13.098		87.669		111.751		42.567		64.748		111.751			33.061
						Full IN-FullDN	0.0033198	**											724.271		303.672		79.324		1229.69		48.693		19.329		72.987		34.328		52.284		92.211		51.334		38.87		75.522		51.334			91.577
						1/3DN-2/3DN	0.1176	N.S.											602.274		425.563		191.815		95.379		62.108		74.994		87.986		61.368		75.839		94.851		55.453		36.758		88.936		55.453			125.694
						1/3DN-FullDN	0.14617	N.S.											102.245		146.291		221.812		121.997		68.023		79.747		51.756		78.796		72.67		75.205		75.416		45.102		118.089		75.416			160.761
						2/3DN-FullDN	0.899995	N.S.											58.516		488.833		102.034		145.34		86.084		90.732		81.543		75.944		30.948		73.938		84.394		41.405		38.87		84.394			36.441
																			90.415		65.699		540.906		634.067		75.733		67.494		52.179		83.549		32.849		69.501		53.763		115.237		94.534		53.763			303.989
																			75.839		494.536		110.589		144.178		65.171		67.706		55.242		92.211		57.883		55.664		82.176		48.482		79.219		82.176			132.031
																			127.701		126.116		1893.22		952.421		110.061		55.77		83.549		33.906		28.202		61.791		60.734		74.043		50.278		60.734			116.188
																			107.209		31.159		1197.26		72.248		60.206		80.803		77.106		49.855		41.299		109.005		107.104		56.932		53.129		107.104			95.908
																			47.531		148.826		184.844		137.629		16.9		9.929		53.341		14.576		41.088		94.957		30.631		53.763		44.468		30.631			36.441
																			59.889		127.384		101.189		193.716		58.199		58.411		24.083		87.563		46.898		77.846		77.318		52.073		38.659		77.318			94.851
																			171.641		100.872		232.903		236.494		89.253		73.621		65.171		142.066		27.251		46.053		49.644		55.453		62.53		49.644			49.327
																			98.865		162.874		70.769		62.741		83.549		77.423		31.054		35.173		53.974		60.523		73.832		71.825		80.592		73.832			35.173
																			113.758		121.574		249.486		1091.32		117.455		67.389		33.8		50.066		74.782		62.319		117.772		77.634		78.796		117.772			91.471
																			57.249		76.578		161.184		140.481		74.36		38.659		41.616		79.008		53.341		99.393		69.607		43.201		38.659		69.607			51.334
																			68.868		549.884		99.71		96.013		49.749		50.806		100.027		108.054		56.193		59.256		65.699		57.777		73.832		65.699			41.828
																			92.422		168.472		284.131		716.982		33.166		36.335		46.475		105.836		48.693		61.051		96.647		23.132		50.7		96.647			52.39
																			80.803		698.393		98.654		141.221		20.28		66.966		39.081		49.327		70.769		60.312		105.731		140.693		116.821		105.731			26.512
																			164.247		145.763		50.806		683.288		43.518		57.671		40.349		71.403		59.784		83.655		93.584		59.784		87.246		93.584			85.345
																			106.998		87.352		271.879		26.618		54.714		72.036		69.396		40.877		70.452		49.538		119.251		37.18		95.591		119.251			20.174
																			114.392		491.684		165.937		116.082		33.272		87.035		28.202		102.668		72.881		57.249		100.344		135.411		65.276		100.344			60.734
																			214.841		192.766		121.046		41.722		44.363		85.768		68.445		47.003		75.099		70.346		52.39		61.263		46.369		52.39			40.983
																			127.278		220.756		148.509		81.331		42.989		50.066		97.492		45.524		37.497		74.36		36.441		1129.55		28.73		36.441			59.995
																			104.886		83.549		128.968		144.812		29.258		46.053		116.293		73.515		88.936		90.943		58.199		805.179		92.633		58.199			33.906
																			136.89		200.899		127.912		198.047		14.048		78.163		19.752		77.846		53.657		40.56		103.829		163.719		56.932		103.829			59.784
																			159.494		54.608		99.182		233.854		57.671		23.766		44.996		102.562		96.119		82.071		62.108		712.652		25.561		62.108			66.332
																			166.993		57.143		204.49		521.682		74.149		16.794		43.306		46.792		31.688		60.629		56.087		1071.35		50.806		56.087			59.044
																			208.398		637.447		146.819		150.621		50.278		76.473		53.763		113.547		21.231		56.087		47.743		938.056		11.936		47.743			106.364
																			106.259		130.13		71.191		932.457		65.699		101.717		31.159		63.903		670.719		140.481		49.538		484.502		25.033		49.538			81.754
																			142.171		203.328		169.317		111.118		84.817		57.671		29.258		79.536		479.221		77.318		59.044		210.616		73.938		59.044			122.208
																			133.51		65.487		154.741		116.716		58.833		39.715		23.132		56.932		511.225		42.25		63.692		526.435		63.798		63.692			74.888
																			130.975		146.291		61.896		161.078		81.437		53.129		45.524		57.46		499.395		27.568		85.345		63.164		38.236		85.345			13.52
																			179.668		677.268		107.315		778.456		84.394		26.618		44.891		58.094		446.688		42.461		803.701		32.744		36.441		803.701			133.299
																			145.657		115.976		129.074		109.427		66.227		36.229		13.943		45.102		365.885		30.103		434.119		112.702		57.777		434.119			36.863
																			160.022		134.778		172.38		391.341		46.898		95.379		69.924		68.128		517.246		15.421		740.748		1586.59		73.304		740.748			152.417
																			83.021		376.131		165.514		142.699		105.414		42.039		37.708		46.686		259.943		56.509		631.954		93.056		66.016		631.954			63.798
																			149.459		172.486		88.936		75.205		20.491		61.685		57.671		80.275		801.482		95.485		665.86		229.629		156.642		665.86			29.786
																			124.532		127.701		187.801		57.883		54.503		1181.31		54.291		39.081		426.619		52.812		400.108		1114.98		59.361		400.108			36.652
																			100.661		105.519		118.723		74.149		77.846		358.914		26.512		30.843		560.129		42.884		1295.28		951.998		139.636		1295.28			82.071
																			143.227		113.864		140.693		93.901		100.449		1115.08		45.841		49.432		622.554		40.56		553.686		586.219		1033.01		553.686			121.363
																			134.355		538.265		118.723		589.176		47.426		728.179		111.54		26.089		314.34		61.263		695.435		273.146		1193.03		695.435			46.898
																			174.176		62.953		57.249		82.704		88.302		107.209		51.545		45.524		79.853		27.779		658.994		424.084		741.804		658.994			40.983
																			62.108		100.449		208.504		154.318		70.769		995.093		33.589		44.679		52.707		54.186		691.738		46.686		1689.37		691.738			29.997
																			139.531		133.51		966.891		906.474		20.386		404.861		63.903		35.279		86.19		66.755		627.729		62.53		390.918		627.729			28.413
																			114.814		206.074		109.639		120.941		35.596		427.57		22.604		54.503		132.137		43.095		549.778		439.4		1435.02		549.778			43.306
																			77.423		193.294		528.442		161.184		13.943		678.746		51.017		92.105		54.186		43.729		410.036		708.216		1100.3		410.036			88.091
																			145.974		303.249		86.401		209.138		47.214		822.185		28.519		72.036		59.784		94.006		552.947		1143.5		1015.8		552.947			119.145
																			71.719		697.019		101.4		173.436		34.856		751.839		43.94		62.213		71.508		27.04		641.355		70.135		811.834		641.355			187.167
																			101.928		273.041		131.081		85.556		93.689		576.818		679.38		46.053		70.663		60.946		76.473		55.981		774.865		76.473			149.565
																			90.626		171.113		166.676		185.372		188.646		654.347		474.996		61.896		55.136		54.714		43.729		38.236		710.328		43.729			74.571
																			171.324		134.778		119.462		885.771		89.57		327.86		712.229		48.799		51.228		22.604		20.914		88.514		85.873		20.914			111.223
																			172.908		209.454		129.074		685.189		143.65		510.908		707.159		44.257		76.156		139.108		31.476		39.081		37.602		31.476			104.041
																			132.559		114.075		212.518		760.183		107.843		3383.17		774.865		49.432		64.748		84.606		81.014		37.074		82.704		81.014			165.514
																			133.933		534.462		157.487		761.768		118.089		627.729		510.169		57.143		56.087		155.374		50.172		80.592		36.758		50.172			75.205
																			187.907		154.424		58.939		93.689		115.554		143.756		644.207		38.025		61.685		84.923		89.042		27.357		30.42		89.042			72.142
																			123.264		81.859		181.253		97.914		80.169		63.692		61.368		73.198		96.119		91.471		338.423		45.313		61.051		338.423			30.737
																			189.491		62.108		102.139		150.41		55.77		72.142		64.537		27.357		51.756		135.939		772.858		46.475		113.547		772.858			211.356
																			189.808		169.634		62.741		147.347		198.786		116.821		68.128		35.807		38.131		56.932		761.028		37.919		30.526		761.028			149.248
																			190.97		183.893		189.069		140.27		100.978		411.938		54.503		23.449		46.369		50.806		432.218		62.002		30.631		432.218			146.079
																			72.142		118.194		113.019		546.821		105.414		395.671		806.13		41.828		36.018		39.609		677.796		92.633		122.419		677.796			123.264
																			61.051		115.976		135.939		73.938		94.534		674.838		1114.66		17.006		33.906		79.008		570.798		68.656		155.269		570.798			62.953
																			179.879		109.322		209.454		85.451		61.685		487.037		491.368		68.234		95.062		53.657		351.414		98.654		94.534		351.414			66.649
																			251.81		145.974		195.829		91.894		26.301		19.963		546.293		53.446		64.22		75.205		56.509		54.714		106.47		56.509			190.442
																			203.328		69.924		74.466		578.297		44.363		28.519		472.144		22.815		29.681		51.439		48.693		34.434		78.163		48.693			140.904
																			164.986		51.756		289.835		149.354		110.378		13.837		932.88		946.823		46.053		99.921				12.781		64.009		71.719			150.41
																			70.98		344.338		158.226		83.021		71.931		23.871		127.384		229.101		35.49		60.946				25.456		76.156		78.902			115.026
																			103.09		462.532		178.612		261.739		78.691		5.493		37.18		2334.95		68.445		48.904				612.414		86.612		49.538			120.201
																			132.982		62.213		133.193		103.09		143.227		53.869		728.707		527.914		40.349		55.876				1097.87		30.843		49.644			138.791
																			76.473		88.619		125.06		243.149		98.337		70.029		961.082		731.136		41.088		48.059				975.341		68.128		78.585			125.588
																			132.982		121.152		249.803		412.043		82.176		66.649		1571.07		571.114		69.396		52.496				637.869		42.989		100.978			71.719
																			150.516		387.538		206.497		140.164		77.212		22.709		442.674		394.509		50.911		85.345				51.228		27.357		36.441			109.85
																			218.221		75.311		125.483		874.153		54.186		60.523		1401.22		791.131		105.308		35.49				80.169		56.932		124.109			67.389
																			277.688		84.5		163.719		114.498		78.374		52.812		889.468		85.134		31.054		54.714				1020.65		108.16		88.197			149.354
																			119.673		110.589		59.573		152.206		86.19		10.985		875.103		40.032		29.469		27.885				895.489		128.229		116.61			112.385
																			56.721		121.68		79.958		588.859		23.66		74.149		757.226		548.616		57.883		59.361				1129.87		131.503		75.099			216.848
																			71.719		110.061		76.473		172.274		74.466		14.576		732.721		29.681		58.939		36.546				1538.96		44.679		66.755			97.069
																			223.925		129.708		246.212		218.433		127.806		98.654		414.473		695.963		54.925		39.081				572.488		730.08		120.729			152.523
																			160.022		95.696		218.327		178.718		53.341		29.786		47.214		879.645		27.146		38.659				851.337		996.994		81.437			115.765
																			214.736		175.232		177.661		87.774		40.032		97.175		67.494		217.904		16.689		53.446				890.102		987.594		82.916			201.744
																			310.538		159.705		274.519		168.155		35.913		53.552		92.633		665.543		40.138		28.941				949.041		881.758		86.718			92.105
																			207.342		153.896		117.561		432.64		82.071		65.91		46.158		101.4		33.378		38.447				1090.16		1402.49		89.781			92.739
																			103.724		160.761		96.964		1044.42		38.236		51.334		47.848		96.752		15.844		42.039				917.67		1497.87		84.394			75.628
																			102.984		206.814		131.926		81.543		197.624		35.596		29.892		57.988		46.686		42.989				1610.36		56.298		50.911			225.932
																			169.951		192.132		112.491		645.263		79.113		44.679		112.491		42.144		40.243		40.032				635.968		49.327		112.913			285.504
																			149.565		211.778		107.632		188.646		88.091		70.135		454.716		34.434		32.955		71.614				750.149		31.054		69.818			217.693
																			134.038		151.994		190.231		146.924		74.677		23.132		474.362		40.666		51.334		1114.34				67.494		33.694		51.968			157.064
																			145.234		105.942		88.725		179.562		72.564		30.103		81.226		74.043		34.117		736.523				79.43		25.984		19.963			78.374
																			129.813		148.086		327.966		95.379		58.833		63.586		39.187		54.714		41.511		1339.22				71.931		18.062		59.995			146.924
																			89.781		241.036		936.577		106.998		100.344		43.518		112.702		93.901		52.073		526.224				57.777		556.644		51.756			38.87
																			106.47		123.264		154.846		84.817		78.796		21.97		54.608		71.614		463.694		521.365				111.118		492.952		38.87			166.043
																			78.796		81.12		301.665		68.762		55.559		186.956		36.758		61.579		757.754		293.215				59.256		949.252		56.615			113.124
																			146.291		83.761		104.463		408.135		91.26		535.519		43.201		98.548		509.007		918.938				64.854		981.784		91.577			202.061
																			136.784		139.636		59.784		118.194		114.709		480.383		14.999		56.932		253.711		684.239				79.219		1596.42		55.559			142.911
																			155.797		192.026		984.319		111.118		95.485		902.143		60.206		30.526		344.866		421.338				35.49		917.459		33.694			28.941
																			216.531		134.461		878.483		155.163		65.487		198.892		95.062		48.482		681.176		517.246				77.318		108.899		26.618			43.834
																			149.459		103.301		102.984		313.918		75.944		772.647		59.044		39.821		829.262		138.897				30.631		143.439		34.011
																			200.265		85.345		159.494		171.429		85.345		299.13		63.798		94.746		240.403		432.851				43.095		226.883		47.954
																			135.939		56.087		189.069		219.383		143.439		138.157		19.646		59.784		452.603		460.208				57.988		121.891		39.398
																			115.237		265.436		157.381		847.535		95.062		547.983		34.011		87.774		587.697		708.004				42.356		204.384		76.156
																			160.233		325.748		231.213		899.291		44.257		610.196		39.821		67.283				431.373				33.906		202.061		68.973
																			133.616		550.729		91.577		175.021		96.224		765.781		23.66		37.286				819.65				92.844				21.864
																			112.702		517.774		175.654		140.798		154.952		881.124		23.871		84.5				1303.41				28.73				95.696
																			186.534		315.924		107.315		95.908		79.853		490.839		11.83		76.789				1203.81				74.043				78.163
																			141.432		168.261				162.662		79.324		473.2		37.391		117.666				896.756				37.497				84.183
																			148.403		226.777				226.037		72.248		237.234		410.036		47.954				905.418				30.209				113.441
																			157.593		132.982				216.426		121.363		339.162		380.989		46.369				420.282				24.822				140.27
																			235.016		135.2				109.639		171.535		120.835		363.561		35.701				728.179				35.173
																			119.568		140.587						71.719		28.202		1422.13		43.306				514.394				19.752
																			139.108		145.763						141.749		475.101				82.282				465.384				25.033
																			145.34		117.349						48.587		509.852				40.138				113.441				883.764
																			73.515		306.524						40.138		72.248				17.323				879.962				560.763
																			218.433		124.426						86.507		57.143				6.232				549.673				734.094
																			118.089		141.96						81.437		48.271				122.208				1498.5				831.586
																			196.674		197.096						149.882		19.646				60.312				1612.68				939.429
																			192.132		180.091						119.99		14.893				74.571								724.904
																			126.856		241.776						149.988		24.822				77.423								1098.39
																			133.827		477.742						43.095		33.906				51.651								812.256
																			128.757		343.07						99.71		40.032				44.151								210.511
																			202.061		613.787						65.276		32.533				54.397								222.658
																			133.51		232.586						110.061		35.913				47.954								726.911
																			116.293		108.899						58.728		71.191				52.284								406.656
																			99.71		176.288						122.314						63.586								123.159
																			68.445		364.301						49.116						55.981								955.061
																			153.579		100.133						140.27						36.018								1018.23
																			193.083		136.151						124.215						69.29								70.135
																			190.864		229.101						63.058						76.473								48.693
																			106.364		279.906						73.409						78.585								72.881
																			100.238		315.185						104.886						34.434								72.67
																			181.675		109.639						57.988						33.589								38.236
																			154.424		236.917						118.723						37.286								32.814
																			156.431		159.811						60.523						658.678								40.121
																			88.408		49.432						50.278						663.642								31.204
																			72.564		111.223						56.826						593.613								70.874
																			323.846		100.766						34.434						540.166								92.293
																			127.701		124.109						58.094						56.721								78.479
																			142.488		181.886						62.53														54.928
																			92.422		59.678						93.267														23.19
																			132.454		48.165						91.999
																			201.744								31.582
																			197.096								45.947
																			115.343								20.597
																			934.148								17.956
																			643.362								47.214
																			642.094								57.671
																			120.096								64.431
																			156.853								29.786
																			155.058								48.482
																											25.35
																											60.629
																											30.209
																											73.409
																											19.752
																											67.6
																											47.954
																											51.123
																											49.855
																											18.062
																											17.851
																											17.006
																											25.561
																											87.141
																											67.811
																											106.576
																											46.686
																											27.779
																											124.849
																											69.184
																											60.101
																											159.388
																											163.402
																											126.644
																											104.358
																											85.979
																											144.601
																											40.349
																											43.201
																											60.946
																											23.132
																											56.193
																											52.812
																											62.741
																											2267.87
																											67.917
																											23.238
																											461.159
																											348.034
																											308.425
																											960.871
																											499.923
																											315.608
																											722.792
																											409.931
																											622.237
																											974.285
																											251.282
																											802.433
																											953.477
																											675.261
																											202.272
																											167.416
																											75.944
																											703.991
																											113.547
																											2175.88
																											120.518
																											228.15
																											590.127
																											40.771
																											63.903
																											18.801
																											35.807
																											41.088
																											17.745
																											52.707
																											89.993
																											50.911
																											56.826
[truncated: 54 more columns]
