# Supplementary material for: Neural control of growth and size in the axolotl limb regenerate
Source: eLife journal article supplement (doi:10.7554/elife.68584), 2021-11-15
Supplement: supp [file elife_poa_e68584_Figure_5_figure_supplement_1_source_data_1.xlsx]

## Sheet: Source data
Figure 5-figure supplement 1D						Figure 5-figure supplement 1E
	Large Animals	Small Animals				1.5385pixels/micron
Body Length (cm)	13.6	6.8
	14.2	6.5							DRG 3			DRG 4			DRG 5
	13.8	7				Bio Rep	Slide	Section	Tec Reps	in um	AVG	Tec Reps	in um	AVG	Tec Reps	in um	AVG
		6.6				Small 1	2b	1	54105.1	35167.4	37036.2	69282.5	45032.5	40682.9	21647.6	14070.6	14378.4
								2	56352.3	36628.1		60744.5	39482.9		23036	14973
AVG	13.8667	6.76667						3	60483.3	39313.1		57744.9	37533.3		21679.7	14091.5
SEM	0.176383	0.110868				Small 2	4a	4	60888.2	39576.3	36252.9	84702.9	55055.5	46182	29644.7	19268.6	17746.9
Ttest	3.0411e-07						4a	2	63075.2	40997.8		70767.8	45997.9		28828	18737.7
							5a	3	43361.9	28184.5		57682.4	37492.6		23437.9	15234.3
						Small 3	a	3	73985.7	48089.5	33771.4	89460.7	58148	58910.1	24468.9	15904.4	17711.7
							9a	5	44952.5	29218.4		122991	79942.2		31278.9	20330.8
							9a	1	36933.8	24006.4		59447.9	38640.1		26000.5	16899.9
						Small 4	4a	5	33053.9	21484.5	19319.8	56588	36781.3	31539	30452.3	19793.5	10201.6
							4a	1	26820.7	17433		45389.5	29502.4			0
							5a	2	29295.7	19041.7		43591	28333.5		16633.4	10811.4
						Large 1	12a	3	77373.4	50291.5	48612.4	68888.3	44776.3	43966.2	31219.9	20292.4	20742.4
							13a	2	84029.2	54617.6		62408.7	40564.7		31982.1	20787.9
							14a	4	62968	40928.2		71628.8	46557.6		32534.3	21146.8
						Large 2	15a	3	55841.7	36296.2	41356.9	187280	121729	112468	44752.6	29088.5	30572.4
							15a	2	46474.2	30207.4		186716	121363		52767	34297.7
							16a	3	88567	57567.1		145098	94311.3		43587.5	28331.2
						Large 3	10a	2	86256.5	56065.3	47678.7	219914	142941	111790	43559.9	28313.2	29657.5
							10a	1	88032.4	57219.6		197213	128185		37137	24138.4
							11a	4	45772.2	29751.2		98840.9	64245		56187.1	36520.7
							AVG
							DRG 3	DRG 4	DRG 5	Total
						Small 1	37036.2	40682.9	14378.4	92097.5
						Small 2	36252.9	46182	17746.9	100182
						Small 3	33771.4	58910.1	17711.7	110393
						Small 4	19319.8	31539	10201.6	61060.4
						Large 1	48612.4	43966.2	20742.4	113321
						Large 2	41356.9	112468	30572.4	184397
						Large 3	47678.7	111790	29657.5	189126
							AVG	SEM		Ttest
						6cm	90933.2	10637.9		0.0313542
						14cm	162281	24518.3
