# Supplementary material for: Neural control of growth and size in the axolotl limb regenerate
Source: eLife journal article supplement (doi:10.7554/elife.68584), 2021-11-15
Supplement: supp [file elife_poa_e68584_Figure_5_figure_supplement_2_source_data_1.xlsx]

## Sheet: Sheet1
Figure 5-figure supplement 2A data
Limb Length	AVERAGE	Large Host				Small Host
		DPG	Large Host, Large Donor	Large Host, Small Donor		DPG	Small Host, Large Donor	Small Host, Small Donor
		0	0.410714	0.208333		0	0.531818	0.405
		18	0.471429	0.438889		18	0.536364	0.425
		32	0.8	0.777778		38	0.609091	0.54		Early Tiny Limb
		38	0.95	0.933333		49	0.763636	0.81
		45	1.15714	1.19444		59	0.927273	1.045		Late Tiny Limb
		59	1.44286	1.45		77	1.13182	1.27
		75	1.60714	1.67778		95	1.33636	1.465
		81	1.7	1.84444		115	1.54	1.78333
		88	1.81429	1.93333		130	1.715	1.82222
		95	1.86429	2.01111
		102	2.05714	2.08889
		109	2.12857	2.2
		115	2.18571	2.32222
		123	2.24286	2.37778
		130	2.4	2.55556
	SEM	Large Host				Small Host
		DPG	Large Host, Large Donor	Large Host, Small Donor		DPG	Small Host, Large Donor	Small Host, Small Donor
		0	0.0107143	0.00833333		0	0.0181818	0.0157233
		18	0.014869	0.0246894		18	0.015212	0.0214087
		32	0.0361873	0.0237333		38	0.0221751	0.0314466
		38	0.0361873	0.0333333		49	0.028676	0.0233333
		45	0.0368856	0.0316715		59	0.0400929	0.0337062
		59	0.0480929	0.0493007		77	0.0581036	0.038873
		75	0.0468388	0.0682678		95	0.0639925	0.0489047
		81	0.057735	0.0959038		115	0.0748331	0.148371
		88	0.0704698	0.121335		130	0.108025	0.0928376
		95	0.0520008	0.116003
		102	0.0685119	0.137885
		109	0.0680136	0.137437
		115	0.0737711	0.134141
		123	0.0947607	0.151637
		130	0.0816497	0.123728
Figure 5-figure supplement 2B data
Limb Length (cm)	AVG								SEM
		Small Hosts			Large Hosts					Small Hosts			Large Hosts
	DPG	Small Host, Large DRG	Small Host, Small DRG	Small Host, Control	Large Host, Large DRG	Large Host, Small DRG	Large Host, Control		DPG	Large DRG	Small DRG	Control	Large DRG	Small DRG	Control
	0	0.3	0.315	1.545	0.321429	0.3275	2.62		0	0.00362738	0.00819178	0.0240947	0.00863529	0.00676193	0.0512076
	10	0.305	0.318421	1.72	0.341667	0.358333	2.81		10	0.005	0.00872796	0.0260342	0.0148647	0.0108841	0.0531246
	16	0.393421	0.382895	1.79	0.435417	0.436765	2.835		16	0.00913713	0.0132526	0.0221108	0.0155268	0.0151763	0.032532
	24	0.443421	0.5	1.895	0.56	0.502778	2.9325		24	0.0210161	0.0228618	0.0229129	0.0288937	0.0314991	0.0459544
	32	0.614474	0.689474	2.09	0.741667	0.644444	3.04		32	0.0379633	0.0388672	0.0286744	0.0621074	0.0451738	0.0470225
	45	0.777632	0.843421	2.215	0.8875	0.851562	3.12		45	0.0302218	0.0367166	0.0401732	0.0927535	0.0485449	0.0512076
	59	0.944737	0.959211	2.42	1.02917	0.990625	3.175		59	0.0333102	0.0415881	0.0351188	0.107213	0.057231	0.0578552
	73	1.13421	1.15526	2.55	1.13542	1.16563	3.335		73	0.0393297	0.0404461	0.035746	0.091931	0.0700772	0.0441273
	87	1.33158	1.32368	2.6625	1.34792	1.33125	3.425		87	0.0471731	0.0453412	0.031013	0.115571	0.0710963	0.0578552
	108	1.52895	1.53684	2.87	1.5375	1.47812	3.515		108	0.0607357	0.0521248	0.0402768	0.111825	0.0793159	0.0567891
	135	1.63421	1.71053	2.9	1.6125	1.59062	3.57		135	0.0675439	0.0519473	0.0394405	0.118085	0.0903948	0.0558768
AVG		0.855239	0.884976	2.24159	0.904562	0.879785	3.12523			0.032278	0.0327332	0.0314178	0.0697642	0.0478323	0.0503229
SEM		0.148671	0.149654	0.142623	0.14109	0.139239	0.0938752			0.00645967	0.00500094	0.00213454	0.0134995	0.00869685	0.00229707
