# Supplementary material for: Neural control of growth and size in the axolotl limb regenerate
Source: eLife journal article supplement (doi:10.7554/elife.68584), 2021-11-15
Supplement: supp [file elife_poa_e68584_Figure_5_source_data_1.xlsx]

## Sheet: Source data
Figure 5B data
Large Donor Animal Measurments day of amputations
Animal #	RFL length		LFL length		Body Length	RFL Width
	Before	After	Before	After
223	1.9	0.5	1.9	0.4	10.2	0.3
225	2.3	0.6	2.1	0.5	12	0.4
226	2.1	0.4	2.2	0.5	11	0.3
227	2.2	0.5	2.2	0.5	11.5	0.4
229	2.2	0.6	2.1	0.5	12	0.3
238	2.3	0.6	2.2	0.5	12.25	0.4
241	2.2	0.5	2.3	0.5	12.5	0.4
243	2.2	0.4	2.1	0.6	11.25	0.3
247	2	0.4	2.2	0.6	11	0.3
248	2.1	0.4	2.2	0.5	10.5	0.4
Average	2.15	0.49	2.15	0.51	11.42	0.35
STD	0.12693	0.0875595	0.108012	0.0567646	0.763835	0.0527046
					Ttest	7.50623e-15
Small Donor Animal Measurments day of amputations
Animal #	RFL length		LFL length		Body Length	RFL Width
	Before	After	Before	After
222	1	0.3	1.1	0.4	5.75	0.2
230	1	0.3	1.1	0.3	5.5	0.15
231	1.2	0.4	1.3	0.3	5.5	0.2
232	1	0.2	1.2	0.2	5.25	0.2
235	1.3	0.4	1.1	0.3	6	0.2
237	1.1	0.3	1	0.25	5.2	0.15
240	1.1	0.3	1	0.3	5.25	0.2
242	1.1	0.3	1.4	0.4	5.75	0.2
244	1.2	0.3	1.3	0.4	5.5	0.2
245	1.1	0.2	1.2	0.25	5.5	0.2
Average	1.11	0.3	1.17	0.31	5.52	0.19
STD	0.0994429	0.0666667	0.133749	0.0699206	0.255169	0.0210819
Figure 5C data
Grafts on Large Hosts	Days Post Grafting	0		18		32		38		45		59		75		81		88		95		102		109		116		123		130		135
		Large	Small	Large	Small	Large	Small	Large	Small	Large	Small	Large	Small	Large	Small	Large	Small	Large	Small	Large	Small	Large	Small	Large	Small	Large	Small	Large	Small	Large	Small	Large	Small
	Limb Length (cm)	0.4	0.2	0.5	0.4	0.8	0.75	0.9	0.8	1.3	1	1.4	1.1	1.7	1.4	1.8	1.4	1.8	1.5	1.8	1.6	2.1	1.5	2.2	1.5	2.2	1.6	2.3	1.6	2.3	1.8	2.4	1.9
		0.45	0.2	0.5	0.4	0.8	0.8	0.9	1	1.1	1.2	1.5	1.55	1.7	2	1.8	2.3	2	2.6	2.1	2.4	2.2	2.7	2.2	2.7	2.3	2.8	2.3	3	2.3	3	2.5	3.1
		0.45	0.175	0.5	0.35	0.7	0.9	1	1.1	1.2	1.3	1.5	1.6	1.6	1.6	1.7	1.6	1.7	1.6	1.8	1.5	2	1.5	2.1	1.6	2.1	1.9	2.2	1.8	2.3	2	2.4	2.2
		0.4	0.2	0.5	0.4	0.75	0.7	1	0.8	1.2	1.2	1.5	1.5	1.6	1.7	1.8	1.8	2	1.8	1.9	2.1	2.2	2.2	2.3	2.4	2.4	2.6	2.4	2.6	2.5	2.6	2.5	2.6
		0.4	0.2	0.45	0.4	0.95	0.7	1.1	0.9	1.2	1.2	1.6	1.4	1.75	1.5	1.8	2	2	2	1.9	2.2	2.2	2.2	2.3	2.3	2.4	2.4	2.6	2.5	2.7	2.6	2.7	2.7
		0.4	0.2	0.45	0.55	0.7	0.85	0.8	0.9	1	1.25	1.2	1.5	1.4	2	1.4	2.2	1.6	2.4	1.65	2.5	1.7	2.6	1.8	2.6	1.9	2.8	1.8	2.8	1.85	2.9	2	3
		0.375	0.2	0.4	0.4	0.9	0.8	0.95	1	1.1	1.3	1.4	1.55	1.5	1.6	1.6	1.7	1.6	1.7	1.9	1.7	2	2	2	2.1	2	2.1	2.1	2.2	2.3	2.3	2.3	2.4
			0.25		0.5		0.8		1		1.1		1.45		1.6		1.7		1.8		2		2		2.2		2.3		2.3		2.4		2.5
			0.25		0.55		0.7		0.9		1.2		1.4		1.7		1.9		2		2.1		2.1		2.4		2.4		2.6		2.6		2.6
	AVG	0.410714	0.208333	0.471429	0.438889	0.8	0.777778	0.95	0.933333	1.15714	1.19444	1.44286	1.45	1.60714	1.67778	1.7	1.84444	1.81429	1.93333	1.86429	2.01111	2.05714	2.08889	2.12857	2.2	2.18571	2.32222	2.24286	2.37778	2.32143	2.46667	2.4	2.55556
	SEM	0.0107143	0.00833333	0.014869	0.0246894	0.0361873	0.0237333	0.0361873	0.0333333	0.0368856	0.0316715	0.0480929	0.0493007	0.0468388	0.0682678	0.057735	0.0959038	0.0704698	0.121335	0.0520008	0.116003	0.0685119	0.137885	0.0680136	0.137437	0.0737711	0.134141	0.0947607	0.151637	0.0975028	0.130171	0.0816497	0.123728
	Ttest	4.41477e-10		0.31253		0.60189		0.741272		0.454095		0.920469		0.436007		0.251044		0.445671		0.312494		0.853306		0.677023		0.425429		0.493815		0.41102		0.342595
Grafts on Small Hosts	Days Post Grafting	0		18		38		49		59		77		95		115		130
		Large Grafts	Small Grafts	Large Grafts	Small Grafts	Large Grafts	Small Grafts	Large Grafts	Small Grafts	Large Grafts	Small Grafts	Large Grafts	Small Grafts	Large Grafts	Small Grafts	Large Grafts	Small Grafts	Large Grafts	Small Grafts
	Limb Length (cm)	0.55		0.55		0.55		0.7		0.8		1		1.25		1.3		1.35
			0.5		0.5		0.6		0.8		1		1.1		1.2		1.25		1.3
		0.4	0.4	0.45	0.4	0.6	0.7	0.8	0.9	1.1	1.1	1.3	1.3	1.5	1.45	1.7	1.6	2.2	1.65
			0.4		0.4		0.4		0.8		1		1.35		1.6		2.85		2
		0.6	0.3	0.6	0.3	0.7	0.4	0.85	0.7	1.1	0.85	1.25	1.2	1.4	1.5	1.5	1.8	1.7	2.15
		0.6		0.6		0.6		0.8		1		1.2		1.4		1.5		1.6
			0.45		0.4		0.6		0.8		1		1.2		1.4		1.5		1.6
			0.4		0.55		0.6		0.9		1.2		1.4		1.6		1.8		2
		0.55		0.55		0.7		0.9		1		1.2		1.4		1.6		1.8
		0.6	0.4	0.6	0.45	0.7	0.6	0.8	0.8	0.9	1	1	1.15	1.15	1.25	1.3		1.4
		0.55	0.4	0.55	0.4	0.6	0.5	0.75	0.7	0.9	1	1	1.2	1.2	1.45	1.4	1.6	1.5	1.7
			0.4		0.45		0.55		0.9		1.2		1.5		1.7		1.9		2.1
		0.5	0.4	0.5	0.4	0.5	0.45	0.6	0.8	0.75	1.1	1	1.3	1.2	1.5	1.4	1.75	1.5	1.9
		0.5		0.5		0.5		0.6		0.7		0.8		1
		0.5		0.5		0.6		0.8		0.95		1.2		1.4		1.6		1.7
		0.5		0.5		0.65		0.8		1		1.5		1.8		2.1		2.4
	AVG	0.531818	0.405	0.536364	0.425	0.609091	0.54	0.763636	0.81	0.927273	1.045	1.13182	1.27	1.33636	1.465	1.54	1.78333	1.715	1.82222
	SEM	0.0181818	0.0157233	0.015212	0.0214087	0.0221751	0.0314466	0.028676	0.0233333	0.0400929	0.0337062	0.0581036	0.038873	0.0639925	0.0489047	0.0748331	0.148371	0.108025	0.0928376
	Ttest	4.81404e-05		0.000384979		0.084216		0.230585		0.0385295		0.0679759		0.132259		0.149209		0.466816
Figure 5D data
DPA	0		15		29		42		62		77		81		88		95		102		107		117		123		130		141		145
Donor Size	Large	Small	Large	Small	Large	Small	Large	Small	Large	Small	Large	Small	Large	Small	Large	Small	Large	Small	Large	Small	Large	Small	Large	Small	Large	Small	Large	Small	Large	Small	Large	Small
Limb Length (cm)	0.55		0.95		1.2		1.6	1.4	2.15	2	2.7	2.3	2.7	2.4	2.8	2.5	2.9	2.7	3.1	2.7	3.1	2.8	3.3	3	3.4	3.1	3.5	3.2	3.6	3.3	3.7	3.4
	0.5		0.8		1		1.7	1.4	2.2	2.1	2.6	2.4	2.75	2.5	2.9	2.55	3.1	2.7	3.1	2.8	3.2	2.9	3.3	3	3.4	3.1	3.5	3.2	3.7	3.4	3.8	3.5
	0.45	0.2	0.75	0.7	0.95	0.8	1.7	1.3	2.3	2	2.7	2.2	2.8	2.3	2.85	2.4	2.9	2.6	3.2	2.7	3.2	2.75	3.4	3	3.5	3	3.6	3.1	3.7	3.35	3.8	3.4
	0.4	0.15	0.75	0.6	0.95	0.7	1.7	1.4	2.3	2.1	2.7	2.3	2.7	2.4	2.8	2.5	3	2.6	3.1	2.8	3.1	2.9	3.3	3	3.4	3.1	3.5	3.2	3.6	3.4	3.7	3.5
	0.5	0.2	0.9	0.65	1.1	0.75	1.6	1.4	2.2	2.1	2.6	2.35	2.7	2.4	2.85	2.6	2.9	2.7	3.1	2.7	3.2	2.8	3.4	3	3.4	3.2	3.5	3.3	3.6	3.4	3.7	3.4
	0.55		1.05		1.05		1.6	1.3	2.2	2	2.6	2.3	2.7	2.3	2.9	2.5	3	2.7	3.2	2.8	3.1	2.8	3.4	3	3.5	3.2	3.6	3.2	3.7	3.3	3.8	3.4
	0.5	0.3	0.9	0.8	0.9	0.9	1.7	1.7	2.1	2	2.6	2.3	2.6	2.4	2.8	2.7	2.9	2.7	2.9	2.7	3.1	2.9	3.3	3.1	3.4	3.2	3.5	3.3	3.6	3.4	3.75	3.5
	0.45	0.2	1.1	0.6	1.1	0.8	1.6	1.6	2.3	2.1	2.6	2.4	2.7	2.4	3	2.5	3.1	2.7	3	2.8	3.2	2.8	3.4	3	3.5	3.2	3.6	3.2	3.7	3.3	3.9	3.5
	0.4	0.2	0.95	0.65	0.95	0.75	1.4	1.3	2.2	2	2.4	2.3	2.65	2.4	2.8	2.5	3	2.7	3	2.8	3.1	2.8	3.2	3.1	3.4	3.2	3.5	3.3	3.6	3.4	3.8	3.4
	0.5	0.3	1	0.7	1	0.85	1.5	1.7	2.2	2.1	2.6	2.4	2.6	2.5	2.7	2.6	2.9	2.8	3	3	3.2	3	3.4	3.1	3.5	3.3	3.6	3.4	3.7	3.5	3.8	3.5
								1.2		2.1		2.3		2.35		2.5		2.6		2.7		2.7		3		3.1		3.2		3.3		3.5
								1.3		2		2.4		2.4		2.5		2.6		2.8		2.9		3		3.1		3.2		3.4		3.5
		0.2		0.7		0.7		1.2		1.9		2.3		2.4		2.4		2.7		2.7		2.8		3		3		3.1		3.4		3.5
		0.2		0.8		0.8		1.5		2.1		2.2		2.4		2.6		2.7		2.8		2.9		3.1		3.2		3.2		3.4		3.5
		0.25		0.8		0.8		1.4		2.15		2.3		2.4		2.5		2.7		2.8		2.9		3		3.2		3.3		3.4		3.5
								1.4		1.9		2.3		2.4		2.5		2.7		2.9		2.8		3		3.1		3.3		3.4		3.5
		0.25		0.95		0.95		1.7		2		2.4		2.5		2.6		2.8		2.7		2.9		3		3.2		3.3		3.4		3.55
		0.2		0.7		0.7		1.4		2		2.3		2.4		2.55		2.7		2.8		2.8		3		3.2		3.2		3.4		3.5
		0.3		0.85		0.85		1.4		2		2.3		2.4		2.5		2.7		2.8		2.7		3		3.2		3.3		3.4		3.5
		0.3		0.8		0.8		1.7		2		2.4		2.5		2.6		2.7		3		2.9		3.1		3.3		3.4		3.5		3.6
AVG	0.48	0.232143	0.915	0.735714	1.02	0.796429	1.61	1.435	2.215	2.0325	2.61	2.3225	2.69	2.4075	2.84	2.53	2.97	2.69	3.07	2.79	3.15	2.8375	3.34	3.025	3.44	3.16	3.54	3.245	3.65	3.3875	3.775	3.4825
SEM	0.0169967	0.0134727	0.0380424	0.0269455	0.0290593	0.0199342	0.0314466	0.0364728	0.0211476	0.0155068	0.0276887	0.0138007	0.0194365	0.0127088	0.0256038	0.015977	0.0260342	0.0123544	0.03	0.0203909	0.0166667	0.017349	0.0221108	0.00993399	0.0163299	0.0183533	0.0163299	0.0184605	0.0166667	0.0125	0.0200693	0.0121801
T Test				0.000656896																												1.00789e-12
