# Supplementary material for: Neural control of growth and size in the axolotl limb regenerate
Source: eLife journal article supplement (doi:10.7554/elife.68584), 2021-11-15
Supplement: supp [file elife_poa_e68584_Figure_7_source_data_1.xlsx]

## Sheet: Sheet1
Raw data
	0 DPG												10 DPG														16 DPG														24 DPG
Host Size	DRG Size	Animal #	Body Length	LENGTH				LL:BL RATIO				Host Size	DRG Size	Animal #	Body Length	LENGTH				LL:BL RATIO		GROWTH RATE				Host Size	DRG Size	Animal #	Body Length	LENGTH				LL:BL RATIO		GROWTH RATE				Host Size	DRG Size	Animal #	Body Length	LENGTH				LL:BL RATIO
				LFL	STAGE	RFL	STAGE	LFL	RFL							LFL	STAGE	RFL	STAGE	LFL	RFL	LFL	RFL							LFL	STAGE	RFL	STAGE	LFL	RFL	LFL	RFL							LFL	STAGE	RFL	STAGE	LFL	RFL
SMALL	Small Host, Large DRG	5B	6.6	0.3	MB	0.3	MB	0.0454545	0.0454545			SMALL	LARGE	5B	7.3	0.3		0.3		0.0410959	0.0410959	0	0			SMALL	LARGE	5B	7.7	0.4	LB	0.45		0.0519481	0.0584416	0.0166667	0.025			SMALL	LARGE	5B	8.5	0.4		0.4		0.0470588	0.0470588
		6B	6.1	0.3	MB	0.3	MB	0.0491803	0.0491803					6B	6.6	0.35		0.3		0.0530303	0.0454545	0.005	0					6B	6.8	0.45	D	0.4		0.0661765	0.0588235	0.0166667	0.0166667					6B	7.2	0.6		0.4		0.0833333	0.0555556
		14B	6.8	0.3	MB	0.3	MB	0.0441176	0.0441176					14B	7.4	0.3		0.3		0.0405405	0.0405405	0	0					14B	8	0.35	Pal	0.425		0.04375	0.053125	0.00833333	0.0208333					14B	8.6	0.35		0.525		0.0406977	0.0610465
		16B	7	0.3	MB	0.35	MB	0.0428571	0.05					16B	7.4	0.3		0.35		0.0405405	0.0472973	0	0					16B	7.8	0.4		0.4		0.0512821	0.0512821	0.0166667	0.00833333					16B	8.4	0.5		0.5		0.0595238	0.0595238
		18B	7	0.3	MB	0.3	MB	0.0428571	0.0428571					18B	8	0.3		0.3		0.0375	0.0375	0	0					18B	8.6	0.4		0.4		0.0465116	0.0465116	0.0166667	0.0166667					18B	9.4	0.4		0.425		0.0425532	0.0452128
		20B	6.9	0.25	MB	0.3	MB	0.0362319	0.0434783					20B	7.4	0.25		0.3		0.0337838	0.0405405	0	0					20B	7.9	0.35		0.4		0.0443038	0.0506329	0.0166667	0.0166667					20B	8.6	0.4		0.35		0.0465116	0.0406977
		22B	5.9	0.3	MB	0.3	MB	0.0508475	0.0508475					22B	6.4	0.35		0.3		0.0546875	0.046875	0.005	0					22B	6.7	0.45		0.375		0.0671642	0.0559701	0.0166667	0.0125					22B	7.2	0.5		0.4		0.0694444	0.0555556
		34B	6.9	0.3	MB	0.3	MB	0.0434783	0.0434783					34B	7.5	0.3		0.3		0.04	0.04	0	0					34B	8	0.35				0.04375	0	0.00833333	-0.05					34B	8.7	0.3				0.0344828	0
		37B	6.9	0.3	MB	0.3	MB	0.0434783	0.0434783					37B	7.3	0.3		0.3		0.0410959	0.0410959	0	0					37B	7.6	0.35		0.425		0.0460526	0.0559211	0.00833333	0.0208333					37B	8.6	0.4		0.65		0.0465116	0.0755814
		40B	6.6	0.3	MB	0.3	MB	0.0454545	0.0454545					40B	7.3	0.3		0.3		0.0410959	0.0410959	0	0					40B	7.8	0.3		0.4		0.0384615	0.0512821	0	0.0166667					40B	8.5	0.375		0.55		0.0441176	0.0647059
	Small Host, Small DRG	45B	7.1	0.4	MB	0.35	MB	0.056338	0.0492958				SMALL	45B	7.8			0.35			0.0448718		0				SMALL	45B	8.2			0.425			0.0518293		0.0125				SMALL	45B	8.7			0.5			0.0574713
		53B	6.5	0.35	MB	0.3	MB	0.0538462	0.0461538					53B	7.2	0.4		0.35		0.0555556	0.0486111	0.005	0.005					53B	7.7	0.4		0.4		0.0519481	0.0519481	0	0.00833333					53B	8.6	0.45		0.425		0.0523256	0.0494186
		54B	6.8	0.25	MB	0.3	MB	0.0367647	0.0441176					54B	7.4	0.25		0.3		0.0337838	0.0405405	0	0					54B	7.9	0.25		0.45		0.0316456	0.056962	0	0.025					54B	8.7	0.35		0.6		0.0402299	0.0689655
		61B	6.4	0.3	MB	0.3	MB	0.046875	0.046875					61B	6.9	0.35		0.3		0.0507246	0.0434783	0.005	0					61B	7.3	0.4		0.425		0.0547945	0.0582192	0.00833333	0.0208333					61B	8	0.5		0.6		0.0625	0.075
		63B	6.7	0.3	MB	0.3	MB	0.0447761	0.0447761					63B	7.3	0.3		0.3		0.0410959	0.0410959	0	0					63B	7.8	0.3		0.35		0.0384615	0.0448718	0	0.00833333					63B	8.6	0.425		0.4		0.0494186	0.0465116
		66B	6.5	0.3	MB	0.25	MB	0.0461538	0.0384615					66B	7.1	0.3		0.25		0.0422535	0.0352113	0	0					66B	7.6	0.375		0.375		0.0493421	0.0493421	0.0125	0.0208333					66B	8.2	0.4		0.45		0.0487805	0.054878
		68B	7	0.3	MB	0.3	MB	0.0428571	0.0428571					68B	7.7	0.3		0.3		0.038961	0.038961	0	0					68B	8.2	0.4		0.4		0.0487805	0.0487805	0.0166667	0.0166667					68B	9.1	0.7		0.5		0.0769231	0.0549451
		73B	6.1	0.35	MB	0.35	MB	0.057377	0.057377					73B	6.8	0.35		0.35		0.0514706	0.0514706	0	0					73B	7.4	0.4		0.4		0.0540541	0.0540541	0.00833333	0.00833333					73B	8.1	0.5		0.55		0.0617284	0.0679012
		77B	6.2	0.35	MB	0.35	MB	0.0564516	0.0564516					77B	6.8	0.35		0.35		0.0514706	0.0514706	0	0					77B	7	0.25		0.4		0.0357143	0.0571429	-0.0166667	0.00833333					77B	7.5	0.4		0.45		0.0533333	0.06
		78B	6.8	0.3	MB	0.3	MB	0.0441176	0.0441176					78B	7.2	0.3		0.3		0.0416667	0.0416667	0	0					78B	7.7	0.425		0.45		0.0551948	0.0584416	0.0208333	0.025					78B	8.5	0.65		0.65		0.0764706	0.0764706
Small Host Control		131B	6.8	1.65	INTACT	1.6	INTACT	0.242647	0.235294			SMALL CONTROL		131B	7.7	1.75	INTACT	1.6	INTACT	0.227273	0.207792	0.01	0			SMALL CONTROL		131B	8	1.8		1.7		0.225	0.2125	0.00833333	0.0166667			SMALL CONTROL		131B	8.6	1.9		1.8		0.22093	0.209302
		139B	7.3	1.5	INTACT	1.55	INTACT	0.205479	0.212329					139B	8.2	1.65	INTACT	1.65	INTACT	0.20122	0.20122	0.015	0.01					139B	8.4	1.7		1.8		0.202381	0.214286	0.00833333	0.025					139B	9.3	1.8		1.9		0.193548	0.204301
		147B	6.7	1.5	INTACT	1.5	INTACT	0.223881	0.223881					147B	7.9	1.7	INTACT	1.7	INTACT	0.21519	0.21519	0.02	0.02					147B	8.4	1.8		1.8		0.214286	0.214286	0.0166667	0.0166667					147B	9.1	1.9		1.9		0.208791	0.208791
		152B	7.3	1.55	INTACT	1.65	INTACT	0.212329	0.226027					152B	8.5	1.75	INTACT	1.85	INTACT	0.205882	0.217647	0.02	0.02					152B	8.7	1.75		1.9		0.201149	0.218391	0	0.00833333					152B	9.6	1.9		2.05		0.197917	0.213542
		153B	7.1	1.4	INTACT	1.55	INTACT	0.197183	0.21831					153B	8.3	1.7	INTACT	1.85	INTACT	0.204819	0.222892	0.03	0.03					153B	8.7	1.75		1.9		0.201149	0.218391	0.00833333	0.00833333					153B	9.5	1.85		1.95		0.194737	0.205263
LARGE	Large Host, Large DRG	957A	13.5	0.3	MB	0.3	MB	0.0222222	0.0222222			LARGE	LARGE	957A	13.9	0.3		0.3		0.0215827	0.0215827	0	0			LARGE	LARGE	957A	14.2	0.4		0.4		0.028169	0.028169	0.0166667	0.0166667			LARGE	LARGE	957A	14.9	0.5		0.45		0.033557	0.0302013
		958A	14.5	0.35	MB	0.3	MB	0.0241379	0.0206897					958A	14.7	0.4		0.3		0.0272109	0.0204082	0.005	0					958A	15	0.4		0.375		0.0266667	0.025	0	0.0125					958A	15.8	0.47		0.5		0.0297468	0.0316456
		960A	15	0.35	MB	0.35	MB	0.0233333	0.0233333					960A	15.4	0.35		0.4		0.0227273	0.025974	0	0.005					960A	15.3	0.4		0.525		0.0261438	0.0343137	0.00833333	0.0208333					960A	15.9	0.7		0.65		0.0440252	0.0408805
		961A	14.3	0.25	MB	0.3	MB	0.0174825	0.020979					961A	14.5	0.25		0.3		0.0172414	0.0206897	0	0					961A	14.7	0.45		0.45		0.0306122	0.0306122	0.0333333	0.025					961A	15.2	0.6		0.6		0.0394737	0.0394737
		962A	13.1	0.35	MB	0.35	MB	0.0267176	0.0267176					962A	13.6	0.35		0.35		0.0257353	0.0257353	0	0					962A	13.9	0.5		0.4		0.0359712	0.028777	0.025	0.00833333					962A	14.4	0.75		0.5		0.0520833	0.0347222
		963A	13.4	0.3	MB	0.35	MB	0.0223881	0.0261194					963A	13.8			0.4			0.0289855		0.005					963A	14			0.4			0.0285714		0					963A	14.7			0.45			0.0306122
		964A	14.6	0.3	MB	0.35	MB	0.0205479	0.0239726					964A	15			0.4			0.0266667		0.005					964A	15.2			0.525			0.0345395		0.0208333					964A	15.9			0.55			0.0345912
	Large Host, Small DRG	967A	14.7	0.3	MB	0.35	MB	0.0204082	0.0238095				SMALL	967A	15.2			0.4			0.0263158		0.005				SMALL	967A	15.4			0.5			0.0324675		0.0166667				SMALL	967A	16			0.7			0.04375
		968A	13.3	0.3	MB	0.3	MB	0.0225564	0.0225564					968A	13.8	0.35				0.0253623		0.005						968A	14	0.4				0.0285714		0.00833333						968A	14.8	0.4				0.027027
		969A	12.9	0.3	MB	0.35	MB	0.0232558	0.0271318					969A	13.3	0.3		0.4		0.0225564	0.0300752	0	0.005					969A	13.6	0.425		0.425		0.03125	0.03125	0.0208333	0.00416667					969A	14.1	0.6		0.55		0.0425532	0.0390071
		970A	13.7	0.25	MB	0.35	MB	0.0182482	0.0255474					970A	14.1	0.25		0.4		0.0177305	0.0283688	0	0.005					970A	14.2			0.425			0.0299296		0.00416667					970A	14.8	0.15		0.4		0.0101351	0.027027
		971A	14.1	0.35	MB	0.35	MB	0.0248227	0.0248227					971A	14.4	0.4		0.35		0.0277778	0.0243056	0.005	0					971A	14.7	0.4		0.425		0.0272109	0.0289116	0	0.0125					971A	15.2	0.55		0.45		0.0361842	0.0296053
		973A	14.2	0.35	MB	0.35	MB	0.0246479	0.0246479					973A	14.6	0.35		0.4		0.0239726	0.0273973	0	0.005					973A	15	0.5		0.55		0.0333333	0.0366667	0.025	0.025					973A	15.6	0.625		0.6		0.0400641	0.0384615
		975A	13.8	0.35	MB	0.35	MB	0.0253623	0.0253623					975A	13.9	0.35		0.4		0.0251799	0.028777	0	0.005					975A	14	0.4		0.45		0.0285714	0.0321429	0.00833333	0.00833333					975A	14.5	0.575		0.5		0.0396552	0.0344828
		976A	14.2	0.35	MB	0.35	MB	0.0246479	0.0246479					976A	14.5	0.35		0.4		0.0241379	0.0275862	0	0.005					976A	14.7	0.375		0.45		0.0255102	0.0306122	0.00416667	0.00833333					976A	15.4	0.5		0.55		0.0324675	0.0357143
		977A	14.3	0.3	MB	0.3	MB	0.020979	0.020979					977A	14.8	0.3		0.3		0.0202703	0.0202703	0	0					977A	15.2	0.4		0.3		0.0263158	0.0197368	0.0166667	0					977A	15.6	0.4		0.3		0.025641	0.0192308
		978A	13.4	0.3	MB	0.35	MB	0.0223881	0.0261194					978A	13.7	0.35		0.4		0.0255474	0.0291971	0.005	0.005					978A	14.2	0.55		0.45		0.0387324	0.0316901	0.0333333	0.00833333					978A	14.6	0.6		0.6		0.0410959	0.0410959
Large Host Control		981A	14.2	2.45	INTACT	2.55	INTACT	0.172535	0.179577			LARGE CONTROL		981A	15	2.7	INTACT	2.65	INTACT	0.18	0.176667	0.025	0.01			LARGE CONTROL		981A	15.3	2.8		2.7		0.183007	0.176471	0.0166667	0.00833333			LARGE CONTROL		981A	16	2.9		2.9		0.18125	0.18125
		982A	13.2	2.5	INTACT	2.5	INTACT	0.189394	0.189394					982A	14.1	2.65	INTACT	2.75	INTACT	0.187943	0.195035	0.015	0.025					982A	14.3	2.75		2.85		0.192308	0.199301	0.0166667	0.0166667					982A	15	2.75		2.85		0.183333	0.19
		983A	14	2.55	INTACT	2.5	INTACT	0.182143	0.178571					983A	14.9	2.65	INTACT	2.8	INTACT	0.177852	0.187919	0.01	0.03					983A	15	2.75		2.75		0.183333	0.183333	0.0166667	-0.00833333					983A	15.7	2.75		2.825		0.175159	0.179936
		984A	12.7	2.95	INTACT	2.7	INTACT	0.232283	0.212598					984A	13.5	3.1	INTACT	2.95	INTACT	0.22963	0.218519	0.015	0.025					984A	13.8	2.95		2.85		0.213768	0.206522	-0.025	-0.0166667					984A	14.2	3.15		3.05		0.221831	0.214789
		985A	14.5	2.8	INTACT	2.7	INTACT	0.193103	0.186207					985A	15.3	2.8	INTACT	3.05	INTACT	0.183007	0.199346	0	0.035					985A	15.6	2.95		3		0.189103	0.192308	0.025	-0.00833333					985A	16.2	3.1		3.05		0.191358	0.188272
MEASURMENT	Limb Length											MEASURMENT	Limb Length													MEASURMENT	Limb Length													MEASURMENT	Limb Length
HOST SIZE	Small Hosts			Large Hosts				Control Ttest				HOST SIZE	Small Hosts			Large Hosts										HOST SIZE	Small Hosts			Large Hosts										HOST SIZE	Small Hosts			Large Hosts
DRG SIZE	Large DRG	Small DRG	Control	Large DRG	Small DRG	Control		2.34061e-13				DRG SIZE	Large	Small	Control	Large	Small	Control								DRG SIZE	Large	Small	Control	Large	Small	Control								DRG SIZE	Large	Small	Control	Large	Small	Control
AVG	0.3	0.315	1.545	0.321429	0.3275	2.62						AVG	0.305	0.318421	1.72	0.341667	0.358333	2.81								AVG	0.393421	0.382895	1.79	0.435417	0.436765	2.835								AVG	0.443421	0.5	1.895	0.56	0.502778	2.9325
SDEV	0.0162221	0.0366348	0.0761942	0.0323103	0.0302403	0.161933						SDEV	0.0223607	0.0380443	0.0823273	0.0514929	0.0461774	0.167995								SDEV	0.0398278	0.0577667	0.0699206	0.0537865	0.0625735	0.102875								SDEV	0.0916068	0.0996522	0.0724569	0.100091	0.133639	0.145321
SEM	0.00362738	0.00819178	0.0240947	0.00863529	0.00676193	0.0512076						SEM	0.005	0.00872796	0.0260342	0.0148647	0.0108841	0.0531246								SEM	0.00913713	0.0132526	0.0221108	0.0155268	0.0151763	0.032532								SEM	0.0210161	0.0228618	0.0229129	0.0288937	0.0314991	0.0459544
Figure 7C
Limb Length (cm)	AVG			Ttest	SEM					0DPG			135DPG
		Small Hosts	Large Hosts			Small Hosts	Large Hosts			Small Host, Large DRG	Large Host, Large DRG		Small Host, Large DRG	Large Host, Large DRG
	DPG	Large DRG	Large DRG		DPG	Large DRG	Large DRG		Limb Length (cm)	0.3	0.3		1.75	1.35
	0	0.3	0.321429		0	0.00362738	0.00863529			0.3	0.35		1.7	2
	10	0.305	0.341667		10	0.005	0.0148647			0.3	0.35		1.5	2.3
	16	0.393421	0.435417		16	0.00913713	0.0155268			0.3	0.25		1.5	1.8
	24	0.443421	0.56		24	0.0210161	0.0288937			0.3	0.35		2	1.45
	32	0.614474	0.741667		32	0.0379633	0.0621074			0.25	0.3		1.7	1.4
	45	0.777632	0.8875		45	0.0302218	0.0927535			0.3	0.3		2.05	1.9
	59	0.944737	1.02917		59	0.0333102	0.107213			0.3	0.3		1.7	2.05
	73	1.13421	1.13542		73	0.0393297	0.091931			0.3	0.3		1.2	1.35
	87	1.33158	1.34792		87	0.0471731	0.115571			0.3	0.35		1.25	1
	108	1.52895	1.5375		108	0.0607357	0.111825			0.3	0.3		1.45	1.7
	135	1.63421	1.6125		135	0.0675439	0.118085			0.3	0.35		1.55	1.05
										0.3	0.35		1.5
										0.35	0.35		1.25
										0.3			1.85
										0.3			1.35
										0.3			2.3
										0.3			1.9
										0.3			1.55
										0.3
									AVG	0.3	0.321429		1.63421	1.6125
									SEM	0.00362738	0.00863529		0.0675439	0.118085
									Ttest	0.0347466			0.874962
Figure 7D
AVG			Ttest Pvalue		SEM
	Small Host	Large Host				Small Host	Large Host
0DPG	1.545	2.62	2.34061e-13		0DPG	0.0240947	0.0512076
135DPG	2.9	3.57	1.22502e-08		135DPG	0.0394405	0.0558768
[truncated: 72 more columns]
