# Supplementary material for: Neural control of growth and size in the axolotl limb regenerate
Source: eLife journal article supplement (doi:10.7554/elife.68584), 2021-11-15
Supplement: supp [file elife_poa_e68584_Figure_8_source_data_1.xlsx]

## Sheet: Sheet1
Note: the raw data from Figure 7-source data 1 was used for the following
Figure 8C
Limb Length (cm)	AVG			Ttest	SEM					0DPG			135DPG
		Large Hosts				Large Hosts				Large DRG	Small DRG		Large DRG	Small DRG
	DPG	Large DRG	Small DRG		DPG	Large DRG	Small DRG		Limb Length (cm)	0.3	0.3		1.35	1.25
	0	0.321429	0.3275		0	0.00863529	0.00676193			0.35	0.3		2	2.05
	10	0.341667	0.358333		10	0.0148647	0.0108841			0.35	0.3		2.3
	16	0.435417	0.436765		16	0.0155268	0.0151763			0.25	0.25		1.8	1.7
	24	0.56	0.502778		24	0.0288937	0.0314991			0.35	0.35		1.45	1.1
	32	0.741667	0.644444		32	0.0621074	0.0451738			0.3	0.35		1.4	2.05
	45	0.8875	0.851562		45	0.0927535	0.0485449			0.3	0.35		1.9	1.75
	59	1.02917	0.990625		59	0.107213	0.057231			0.3	0.35		2.05	1.4
	73	1.13542	1.16563		73	0.091931	0.0700772			0.3	0.3		1.35	1.05
	87	1.34792	1.33125		87	0.115571	0.0710963			0.35	0.3		1	1.3
	108	1.5375	1.47812		108	0.111825	0.0793159			0.3	0.35		1.7
	135	1.6125	1.59062		135	0.118085	0.0903948			0.35	0.3		1.05	1.95
										0.35	0.35
										0.35	0.35			1.8
											0.35			1.4
											0.35			2.05
											0.35			1.85
											0.35			1.65
											0.3			1.1
											0.35
									AVG	0.321429	0.3275		1.6125	1.59062
									SEM	0.00863529	0.00676193		0.118085	0.0903948
									Ttest	0.584444			0.88439
Figure 8D
	Small DRG	Large DRG
Nerve Area (mm2)	3646.07	7176.8
	3505.06	4777.52
	2485.46	4566.53
	3799.65	4729.2
	2273.26	4002.13
Average	3141.9	5050.44
Standard Dev	707.84	1228.03
SEM	316.556	549.19
Mann-Whitney Test	0.0079
